# Supplementary material for: Ruthenium-catalyzed formal sp3 C–H activation of allylsilanes/esters with olefins: efficient access to functionalized 1,3-dienes
Source: Chem Sci. 2021 Feb 2;12(12):4367–72. doi: 10.1039/d0sc06845d (PMC8179449; doi:10.1039/d0sc06845d)
Supplement: SC-012-D0SC06845D-s001 [file SC-012-D0SC06845D-s001.pdf]

Supplementary Information for

**Ruthenium-Catalyzed Formal  $\text{sp}^3$ -H Activation of Allylsilanes/esters  
with Olefins: Efficient Access to functionalized 1,3-Dienes**

Dattatraya H. Dethe<sup>\*a</sup>, Nagabhushana C B<sup>a</sup>, Saikat Das<sup>a,†</sup>, Appasaheb Nirpal<sup>1a†</sup>

<sup>a</sup>Department of Chemistry, Indian Institute of Technology-Kanpur, Kanpur - 208016, India.  
Tel: + 91-512-2596537, fax: + 91-512-2597436.

## Table of Contents

|                                                                                           |         |
|-------------------------------------------------------------------------------------------|---------|
| 1. General Information:.....                                                              | 3       |
| 2. Experimental procedures                                                                |         |
| 2.1. General procedure for the oxidative coupling reaction of allyl esters with acrylates |         |
| 2.1a. Examples with data .....                                                            | 4 - 8   |
| 2.1b. Procedure and data for isomerization of Allylsilanes and Deuterated study.....      | 9       |
| 2.1c. Coupling reaction between vinylsilane <b>6b</b> and methyl acrylate <b>2a</b> ..... | 9-10    |
| 2.1d. Procedure and data for Diels-Alder reaction, <b>8</b> .....                         | 10      |
| 2.2. Gram scale synthesis and its applications.....                                       | 10 - 12 |
| 2.2a. Synthesis of compound <b>5gh</b>                                                    |         |
| 2.2b. Synthesis of compound <b>9</b>                                                      |         |
| 2.2c. Synthesis of compound <b>13</b>                                                     |         |
| 2.2d. Synthesis of compound <b>11</b>                                                     |         |
| 2.2e. Synthesis of compound <b>12</b>                                                     |         |
| 2.2f. Synthesis of compound <b>10</b>                                                     |         |
| 2.3. Total synthesis of norpyrenophorin.....                                              | 12-14   |
| 2.3a. Synthesis of compound <b>19</b>                                                     |         |
| 2.3b. Synthesis of compound <b>20</b>                                                     |         |
| 2.3c. Synthesis of compound <b>21</b>                                                     |         |
| 2.3d. Synthesis of compound <b>22</b>                                                     |         |
| 2.3e. Synthesis of norpyrenophorin <b>14</b>                                              |         |
| 3. NMR spectra.....                                                                       | 15 - 68 |
| 4. References.....                                                                        | 69      |

## 1. General Information:

**General Aspects:** Experiments involving moisture and/or air sensitive components were performed in oven-dried glassware. Commercial solvents and reagents were used without further purification unless otherwise noted. All the chemicals were purchased commercially, and used without further purification. Yields refer to chromatographically pure compounds, unless otherwise stated. Reactions were monitored by thin-layer chromatography (TLC) carried out on 0.25 mm Merck silica gel plates (60F-254) using UV light as a visualizing agent and an p-anisaldehyde or ninhydrine stain, and heat as developing agents. Merck silica gel (particle size 100-200 and 230-400 mesh) was used for flash column chromatography. Neat compounds were used for record IR spectra. NMR spectra were recorded on either a Bruker Avance 400 (<sup>1</sup>H, 400 MHz; <sup>13</sup>C, 100 MHz), Bruker Avance 500 ( <sup>1</sup>H, 500 MHz; <sup>13</sup>C, 125 MHz), or JEOL DELTA (ECX) 500 (<sup>1</sup>H, 500 MHz; <sup>13</sup>C, 125 MHz). Mass spectrometric data were obtained using WATERS-Q-Tof-Premier-HAB213 and WATERS-QTof-Premier-ESI-MS instruments. Optical rotations were measured using a polarimeter (AUTOPOL II) at 30 °C. The following abbreviations were used to explain the multiplicities: s = singlet, d = doublet, t = triplet, q = quartet, spt= septet, dd = doublet of doublet, ddd = doublet of a doublet of a doublet, dt = doublet of a triplet, td = triplet of a doublet, m = multiplet, br = broad.

## 2. Experimental Procedures:

### 2.1. General procedure for the oxidative coupling reaction of allylsilanes/esters with activated olefins

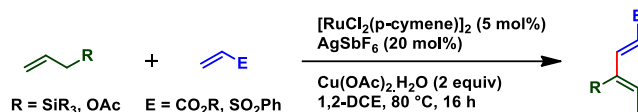

A 8 mL screw-cap vial was charged with  $[\text{RuCl}_2(\text{p-cymene})]_2$  (6.1 mg, 0.01 mmol, 5.0 mol%),  $\text{Cu}(\text{OAc})_2 \cdot \text{H}_2\text{O}$  (80 mg, 0.4 mmol, 2.0 equiv),  $\text{AgSbF}_6$  (14 mg, 0.04 mmol, 20 mol%) and 1,2-dichloroethane (2.0 mL). Then acrylate/vinyl sulfone (0.2 mmol, 1.0 equiv) and allylsilane or allyl ester (0.24 mmol, 1.2 equiv) were added into the solution in sequence. The vial was sealed under  $\text{N}_2$  and heated to  $80^\circ\text{C}$  with stirring for 16 h. After cooling down, the mixture was diluted with ethyl acetate, filtrated and concentrated to give the crude compound which was directly purified by column chromatography.

#### 2.1a. Examples with data

**Compound 3aa** Following general procedure, **3aa** was obtained as a pale yellow oil (30:1::pet ether:EtOAc) (33 mg, 0.16 mmol, 82%).  $^1\text{H}$  NMR (400MHz,  $\text{CDCl}_3$ )  $\delta$  7.38 (d,  $J = 15.9$  Hz, 1H), 6.56 (q,  $J = 7.2$  Hz, 1H), 5.79 (d,  $J = 15.7$  Hz, 1H), 3.70 (s, 3H), 1.88 (d,  $J = 7.2$  Hz, 3H), 0.21 (s, 9H).  $^{13}\text{C}$  NMR (125MHz,  $\text{CDCl}_3$ )  $\delta$  167.9, 152.2, 146.2, 138.3, 116.7, 51.4, 18.3, 0.5 (3C). HRMS (ESI)  $m/z$  calcd. for  $\text{C}_{10}\text{H}_{18}\text{O}_2\text{Si}$   $[\text{M}+\text{H}]^+$  199.1154; found 199.1158. IR (neat):  $\nu_{\text{max}}/\text{cm}^{-1}$  2970, 2950, 1743, 1712, 1643, 1618, 1432, 1300, 1115, 910, 840. NOESY shows that  $\text{H}_a$  (0.21) and  $\text{H}_b$  (1.88) are correlated and also  $\text{H}_c$  (6.56) and  $\text{H}_d$  (7.38) are weakly correlated.

**Compound 3ab** Following general procedure, **3ab** was obtained as a pale yellow oil (30:1::pet ether:EtOAc) (40 mg, 0.168 mmol, 84%).  $^1\text{H}$  NMR (400MHz,  $\text{CDCl}_3$ )  $\delta$  7.38 (d,  $J = 15.9$  Hz, 1H), 6.57 (q,  $J = 7.2$  Hz, 1H), 5.79 (d,  $J = 15.5$  Hz, 1H), 4.12 (t,  $J = 6.4$  Hz, 2H), 1.89 (d,  $J = 7.2$  Hz, 3H), 1.67 - 1.61 (m, 2H), 1.42 - 1.35 (m, 2H), 0.93 (t,  $J = 7.3$  Hz, 3H), 0.22 (s, 9H).  $^{13}\text{C}$  NMR (100MHz,  $\text{CDCl}_3$ )  $\delta$  167.6, 151.8, 146.1, 138.3, 117.2, 64.1, 30.9, 19.3, 18.4, 13.8, 0.5 (3C). HRMS (ESI)  $m/z$  calcd. for  $\text{C}_{13}\text{H}_{24}\text{O}_2\text{Si}$   $[\text{M}+\text{H}]^+$  241.1624; found 241.1626. IR (neat):  $\nu_{\text{max}}/\text{cm}^{-1}$  2975, 2948, 1749, 1716, 1640, 1619, 1430, 1298, 1120, 908, 838.

**Compound 3ac** Following general procedure, **3ac** was obtained as a pale yellow oil (30:1::pet ether:EtOAc) (38 mg, 0.158 mmol, 79%).  $^1\text{H}$  NMR (400MHz,  $\text{CDCl}_3$ )  $\delta$  7.39 (d,  $J = 15.9$  Hz, 1H), 6.58 (q,  $J = 7.2$  Hz, 1H), 5.81 (d,  $J = 15.3$  Hz, 1H), 3.91 (d,  $J = 6.4$  Hz, 2H), 2.00 - 1.94 (m, 1H), 1.89 (d,  $J = 7.0$  Hz, 3H), 0.94 (d,  $J = 6.5$  Hz, 6H), 0.23 (s, 9H).  $^{13}\text{C}$  NMR (125MHz,  $\text{CDCl}_3$ )  $\delta$  167.5, 151.8, 145.8, 138.4, 117.2, 70.4, 27.9, 19.2 (2C), 18.3, 0.5 (3C). HRMS (ESI)  $m/z$  calcd. for  $\text{C}_{13}\text{H}_{24}\text{O}_2\text{Si}$   $[\text{M}+\text{H}]^+$  241.1624; found 241.1626. IR (neat):  $\nu_{\text{max}}/\text{cm}^{-1}$  2978, 2949, 1748, 1716, 1642, 1622, 1431, 1297, 1122, 906, 839.

**Compound 3ad** Following general procedure, **3ad** was obtained as a pale yellow oil (30:1::pet ether:EtOAc) (42 mg, 0.16 mmol, 80%).  $^1\text{H}$  NMR (400MHz,  $\text{CDCl}_3$ )  $\delta$  7.37 (d,  $J = 15.9$  Hz, 1H), 6.57 (q,  $J = 7.2$  Hz, 1H), 5.78 (d,  $J = 15.3$  Hz, 1H), 4.83 - 4.76 (m, 1H), 1.88 (d,  $J = 7.3$  Hz, 3H), 1.76 - 1.71 (m, 2H), 1.43 (d,  $J = 9.8$  Hz, 2H), 1.38 - 1.34 (m, 2H), 0.22 (s, 9H).  $^{13}\text{C}$  NMR (100MHz,  $\text{CDCl}_3$ )  $\delta$  166.9, 151.5, 145.9, 138.3, 117.7, 72.3, 31.8 (2C), 25.5, 23.9 (2C), 18.4, 0.5 (3C). HRMS (ESI)  $m/z$  calcd. for  $\text{C}_{15}\text{H}_{26}\text{O}_2\text{Si}$   $[\text{M}+\text{H}]^+$  267.1780; found 267.1783. IR (neat):  $\nu_{\text{max}}/\text{cm}^{-1}$  2983, 2953, 1743, 1708, 1636, 1620, 1439, 1293, 1115, 902, 832.

**Compound 3ae** Following general procedure, **3ae** was obtained as a pale yellow oil (30:1::pet ether:EtOAc) (54 mg, 0.150 mmol, 71%).  $^1\text{H}$  NMR (500MHz,  $\text{CDCl}_3$ )  $\delta$  7.38 (d,  $J = 15.9$  Hz, 1H), 6.57 (q,  $J = 7.2$  Hz, 1H), 6.37 (d,  $J = 6.9$  Hz, 1H), 6.11 (dd,  $J = 6.9, 5.2$ , Hz, 1H), 5.81 - 5.78 (m, 2H), 4.15 - 4.12 (m, 4H), 1.89 (d,  $J = 7.4$  Hz, 3H), 1.65 (m, 6H), 1.37 - 1.33 (m, 8H), 0.23 (s, 9H).  $^{13}\text{C}$  NMR (125MHz,  $\text{CDCl}_3$ )  $\delta$  167.6, 166.4, 151.8, 146.0, 130.5, 128.7, 117.2, 64.8, 64.4, 29.5, 29.4, 29.3, 29.2, 28.8, 28.7, 26.0 (2C), 18.4, 0.5 (3C). HRMS (ESI)  $m/z$  calcd. for  $\text{C}_{21}\text{H}_{36}\text{O}_4\text{Si}$   $[\text{M}+\text{H}]^+$  381.2461; found 381.2460. IR (neat):  $\nu_{\text{max}}/\text{cm}^{-1}$  2945, 2860, 1769, 1720, 1658, 1629, 1432, 1370, 1259, 1120, 920, 850.

**Compound 3af** Following general procedure, **3af** was obtained as a pale yellow oil (30:1::pet ether:EtOAc) (50 mg, 0.146 mmol, 73%).  $^1\text{H}$  NMR (400 MHz,  $\text{CDCl}_3$ )  $\delta$  7.38 (d,  $J = 15.9$  Hz, 1H), 6.51 (q,  $J = 7.2$  Hz, 1H), 5.79 (d,  $J = 15.7$  Hz, 1H), 4.09 (t,  $J = 6.4$  Hz, 2H), 4.03 (t,  $J = 6.4$  Hz, 2H), 2.03 (s, 3H), 1.89 (d,  $J = 7.2$  Hz, 3H), 1.65 - 1.59 (m, 6H), 1.34 (m, 4H), 0.22 (s, 9H).  $^{13}\text{C}$  NMR (125 MHz,  $\text{CDCl}_3$ )  $\delta$

171.3, 167.5, 151.8, 146.0, 138.4, 117.2, 64.6, 64.2, 29.0, 28.7, 28.6, 25.9, 25.9, 21.1, 18.3, 0.5 (3C). HRMS (ESI)  $m/z$  calcd. for  $C_{18}H_{32}O_4Si[M+H]^+$  341.2148; found 341.2149. IR (neat):  $\nu_{max}/cm^{-1}$  2935, 2850, 1723, 1638, 1463, 1415, 1370, 1293, 1125, 935, 860.

**Compound 3ba** Following general procedure, **3ba** was obtained as a pale yellow oil (30:1::pet ether:EtOAc) (45 mg, 0.166 mmol, 83%).  $^1H$  NMR (500 MHz,  $CDCl_3$ )  $\delta$  7.37 (d,  $J$  = 16.0 Hz, 1H), 7.19 (t,  $J$  = 7.4 Hz, 2H), 7.07 (t,  $J$  = 7.2 Hz, 1H), 6.98 (d,  $J$  = 6.9 Hz, 2H), 6.57 (q,  $J$  = 7.2 Hz, 1H), 5.76 (d,  $J$  = 16.0 Hz, 1H), 3.73 (s, 3H), 2.26 (s, 2H), 1.76 (d,  $J$  = 6.9 Hz, 3H), 0.20 (s, 6H).  $^{13}C$  NMR (100MHz,  $CDCl_3$ )  $\delta$  167.8, 152.0, 147.0, 139.3, 136.7, 128.3 (2C), 128.2 (2C), 124.4, 117.0, 51.5, 26.1, 18.4, -1.3 (2C). HRMS (ESI)  $m/z$  calcd. for  $C_{16}H_{22}O_2Si$   $[M+H]^+$  275.1467; found 275.1469. IR (neat):  $\nu_{max}/cm^{-1}$  3033, 2940, 1820, 1765, 1730, 1663, 1615, 1450, 1370, 1260, 1123, 960, 835.

**Compound 3bb** Following general procedure, **3bb** was obtained as a pale yellow oil (30:1::pet ether:EtOAc) (54 mg, 0.17 mmol, 85%).  $^1H$  NMR (500 MHz,  $CDCl_3$ )  $\delta$  7.35 (d,  $J$  = 15.5 Hz, 1H), 7.18 (t,  $J$  = 7.4 Hz, 2H), 7.06 (t,  $J$  = 7.2 Hz, 1H), 6.98 (d,  $J$  = 7.4 Hz, 2H), 6.59 (q,  $J$  = 6.9 Hz, 1H), 5.75 (d,  $J$  = 16.0 Hz, 1H), 4.12 (t,  $J$  = 6.4 Hz, 2H), 2.26 (s, 2H), 1.76 (d,  $J$  = 6.9 Hz, 3H), 1.65 (m, 2H), 1.40 (m, 2H), 0.93 (t,  $J$  = 7.2 Hz, 3H), 0.20 (s, 6H).  $^{13}C$  NMR (125MHz,  $CDCl_3$ )  $\delta$  167.4, 151.5, 146.5, 139.3, 136.8, 128.3 (2C), 128.2 (2C), 124.4, 117.6, 64.1, 30.9, 26.1, 19.3, 18.3, 13.8, -1.3 (2C). HRMS (ESI)  $m/z$  calcd. for  $C_{19}H_{28}O_2Si$   $[M+H]^+$  317.1937; found 317.1938. IR (neat):  $\nu_{max}/cm^{-1}$  3025, 2930, 1835, 1740, 1715, 1670, 1630, 1425, 1360, 1225, 1115, 930, 840.

**Compound 3bc** Following general procedure, **3bc** was obtained as a pale yellow oil (30:1::pet ether:EtOAc) (54 mg, 0.164 mmol, 82%).  $^1H$  NMR (500 MHz,  $CDCl_3$ )  $\delta$  7.36 (d,  $J$  = 16.0 Hz, 1H), 7.16 (t,  $J$  = 7.4 Hz, 2H), 7.09 (t,  $J$  = 7.2 Hz, 1H), 6.98 (d,  $J$  = 7.4 Hz, 2H), 6.59 (q,  $J$  = 7.1 Hz, 1H), 5.75 (d,  $J$  = 16.0 Hz, 1H), 3.91 (d,  $J$  = 6.9 Hz, 2H), 2.26 (s, 2H), 1.96 (m, 1H), 1.77 (d,  $J$  = 6.9 Hz, 3H), 0.95 (d,  $J$  = 6.9 Hz, 6H), 0.20 (s, 6H).  $^{13}C$  NMR (125MHz,  $CDCl_3$ )  $\delta$  167.4, 151.5, 146.3, 139.3, 136.8, 128.3 (2C), 128.2 (2C), 124.4, 117.6, 70.4, 27.9, 26.1, 19.2 (2C), 18.4, -1.3 (2C). HRMS (ESI)  $m/z$  calcd. for  $C_{19}H_{28}O_2Si$   $[M+H]^+$  317.1937; found 317.1938. IR (neat):  $\nu_{max}/cm^{-1}$  3026, 2932, 1839, 1742, 1717, 1672, 1632, 1430, 1365, 1229, 1116, 938, 838.

**Compound 3cb** Following general procedure, **3cb** was obtained as a pale yellow oil (30:1::pet ether:EtOAc) (45 mg, 0.16 mmol, 80%).  $^1H$  NMR (500 MHz,  $CDCl_3$ )  $\delta$  7.43 (d,  $J$  = 15.9 Hz, 1H), 6.59 (q,  $J$  = 6.9 Hz, 1H), 5.79 (d,  $J$  = 15.4 Hz, 1H), 4.12 (t,  $J$  = 6.7 Hz, 2H), 1.88 (d,  $J$  = 7.2 Hz, 3H), 1.67 - 1.62 (m, 2H), 1.42 - 1.37 (m, 2H), 0.92 (t,  $J$  = 6.7 Hz, 3H), 0.91 (s, 9H), 0.20 (s, 6H).  $^{13}C$  NMR (125MHz,  $CDCl_3$ )  $\delta$  167.5, 152.8, 145.1, 136.8, 117.3, 64.1, 30.9, 27.0 (3C), 19.3, 19.1, 18.5, 13.8, -3.2 (2C). HRMS (ESI)  $m/z$  calcd. for  $C_{16}H_{30}O_2Si$   $[M+H]^+$  283.2093; found 283.2097. IR (neat):  $\nu_{max}/cm^{-1}$  2965, 2939, 2872, 1773, 1720, 1643, 1630, 1315, 1173, 1050, 960, 855.

**Compound 3ag** Following general procedure, **3ag** was obtained as a pale yellow solid (15:1::pet ether:EtOAc) (43 mg, 0.154 mmol, 78%).  $^1H$  NMR (500 MHz,  $CDCl_3$ )  $\delta$  7.87 (d,  $J$  = 7.4 Hz, 2H), 7.58 (t,  $J$  = 7.4 Hz, 1H), 7.51 (t,  $J$  = 7.4 Hz, 2H), 7.37 (d,  $J$  = 14.9 Hz, 1H), 6.60 - 6.54 (m, 1H), 6.24 (d,  $J$  = 14.9 Hz, 1H), 1.89 (d,  $J$  = 7.4 Hz, 3H), 0.19 (s, 9H).  $^{13}C$  NMR (125MHz,  $CDCl_3$ )  $\delta$  149.6, 147.6, 141.5, 136.7, 133.1, 129.3 (2C), 127.5 (2C), 125.9, 18.5, 0.3 (3C). HRMS (ESI)  $m/z$  calcd. for  $C_{14}H_{20}O_2SSi$   $[M+H]^+$  281.1032; found 281.1035. IR (neat):  $\nu_{max}/cm^{-1}$  3039, 2945, 1820, 1778, 1715, 1660, 1615, 1472, 1343, 1235, 1132, 1055, 960, 853.

**Compound 3bg** Following general procedure, **3bg** was obtained as a pale yellow solid (15:1::pet ether:EtOAc) (54 mg, 0.152 mmol, 76%).  $^1H$  NMR (500 MHz,  $CDCl_3$ )  $\delta$  7.82 (d,  $J$  = 7.4 Hz, 2H), 7.59 (t,  $J$  = 7.2 Hz, 1H), 7.52 (t,  $J$  = 7.4 Hz, 2H), 7.30 (d,  $J$  = 15.5 Hz, 1H), 7.10 (t,  $J$  = 7.4 Hz, 2H), 6.99 (t,  $J$  = 7.4 Hz, 1H), 6.90 (d,  $J$  = 6.9 Hz, 2H), 6.58 (q,  $J$  = 7.4 Hz, 1H), 6.05 (d,  $J$  = 14.9 Hz, 1H), 2.21 (s, 2H), 1.80 (d,  $J$  = 7.4 Hz, 3H), 0.18 (s, 6H).  $^{13}C$  NMR (125 MHz,  $CDCl_3$ )  $\delta$  149.3, 148.0, 141.3, 138.8, 135.3, 133.1, 129.3 (2C), 128.3, 128.2 (3C), 127.5 (2C), 126.3, 124.5, 25.9, 18.5, -1.5 (2C). HRMS (ESI)  $m/z$  calcd. for  $C_{20}H_{24}O_2SSi$   $[M+H]^+$  357.1345; found 357.1349. IR (neat):  $\nu_{max}/cm^{-1}$  3050, 2958, 2936, 2915, 1816, 1780, 1740, 1615, 1602, 1520, 1459, 1368, 1232, 1128, 1059, 960, 856.

**Compound 3da** Following general procedure, **3da** was obtained as a pale yellow oil (30:1::pet ether:EtOAc) (49 mg, 0.136 mmol, 68%).  $^1H$  NMR (500 MHz,  $CDCl_3$ )  $\delta$  7.55 (d,  $J$  = 8.0 Hz, 4H), 7.42 - 7.38 (m, 2H), 7.37 - 7.33 (m, 4H), 7.10 (dd,  $J$  = 10.9, 15.5 Hz, 1H), 6.18 - 6.08 (m, 1H), 5.95 (dd,  $J$  = 10.9, 14.9 Hz, 1H), 5.59 (d,  $J$  = 14.9 Hz, 1H), 3.68 (s, 3H), 2.30 (d,  $J$  = 8.0 Hz, 2H), 1.07 (s, 9H).  $^{13}C$  NMR

(125MHz, CDCl<sub>3</sub>)  $\delta$  168.0, 145.6, 141.9, 136.0 (4C), 133.7, 129.5 (2C), 128.5, 127.8 (5C), 117.1, 51.4, 27.9 (3C), 19.4, 18.7. HRMS (ESI)  $m/z$  calcd. for C<sub>23</sub>H<sub>28</sub>O<sub>2</sub>Si [M+H]<sup>+</sup> 365.1937; found 365.1938. IR (neat):  $\nu_{\max}/\text{cm}^{-1}$  3080, 3032, 2980, 2936, 2915, 1826, 1790, 1745, 1630, 1580, 1523, 1480, 1353, 1238, 1130, 1030, 953, 842.

**Compound 5aa** Following general procedure, **5aa** was obtained as a white solid (8.5:1.5::pet ether:EtOAc) (54 mg, 0.132 mmol, 66%). <sup>1</sup>H NMR (500 MHz, CDCl<sub>3</sub>)  $\delta$  7.18 (d,  $J$  = 15.6 Hz, 1 H), 5.83 (q,  $J$  = 7.2 Hz, 1 H), 5.75 (d,  $J$  = 15.6 Hz, 1 H), 3.75 (s, 3 H), 2.54 (t,  $J$  = 7.6 Hz, 2 H), 1.77 - 1.72 (m, 2 H), 1.69 (d,  $J$  = 7.2 Hz, 3 H), 1.42 - 1.38 (m, 2 H), 1.27 (s, 26 H), 0.88 (t,  $J$  = 6.7 Hz, 3 H). <sup>13</sup>C NMR (125 MHz, CDCl<sub>3</sub>):  $\delta$  170.9, 167.3, 145.7, 139.7, 126.3, 116.7, 52.0, 34.2, 32.3, 30.0(8C), 29.9, 29.8, 29.7, 29.5, 25.4, 23.0, 14.5, 12.6. HRMS (ESI)  $m/z$  calcd. for C<sub>25</sub>H<sub>44</sub>O<sub>4</sub> [M+NH<sub>4</sub>]<sup>+</sup> 426.3583; found 426.3583. IR (neat):  $\nu_{\max}/\text{cm}^{-1}$  2925, 2854, 1764, 1725, 1652, 1628, 1435, 1306, 1167.

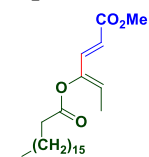

**Compound 5ba** Following general procedure, **5ba** was obtained as a pale yellow oil (8:2::pet ether:EtOAc) (28 mg, 0.13mmol, 65%). <sup>1</sup>H NMR (500 MHz, CDCl<sub>3</sub>)  $\delta$  7.19 (d,  $J$  = 15.5 Hz, 1 H), 5.85 - 5.80 (m, 1 H), 5.73 (d,  $J$  = 15.5 Hz, 1 H), 3.75 (s, 3 H), 2.81 (spt,  $J$  = 7.0 Hz, 1 H), 1.68 (d,  $J$  = 7.2 Hz, 3 H), 1.33 (s, 3 H), 1.32 (s, 3 H). <sup>13</sup>C NMR (125 MHz, CDCl<sub>3</sub>):  $\delta$  174.2, 167.3, 145.6, 139.7, 126.2, 116.5, 77.1, 52.0, 34.3, 19.5(2C), 12.4. HRMS (ESI)  $m/z$  calcd. for C<sub>11</sub>H<sub>16</sub>O<sub>4</sub> [M+H]<sup>+</sup> 213.1127; found 213.1134. IR (neat):  $\nu_{\max}/\text{cm}^{-1}$  2975, 2950, 1757, 1721, 1652, 1627, 1436, 1306, 1168.

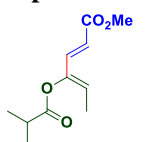

**Compound 5ca** Following general procedure, **5ca** was obtained as a white solid (8:2::pet ether:EtOAc) (35 mg, 0.136 mmol, 68%). <sup>1</sup>H NMR (400 MHz, CDCl<sub>3</sub>)  $\delta$  7.17 (d,  $J$  = 15.3 Hz, 1 H), 5.82 (q,  $J$  = 7.3 Hz, 1 H), 5.74 (d,  $J$  = 15.9 Hz, 1 H), 3.74 (s, 3 H), 2.54 (t,  $J$  = 7.3 Hz, 2 H), 1.77 - 1.72 (m, 2 H), 1.68 (d,  $J$  = 7.2 Hz, 3 H), 1.43 - 1.37 (m, 2 H), 1.35 - 1.31 (m, 4 H), 0.89 (t,  $J$  = 6.7 Hz, 3 H). <sup>13</sup>C NMR (100 MHz, CDCl<sub>3</sub>):  $\delta$  170.9, 167.3, 145.6, 139.7, 126.3, 116.6, 52.0, 34.2, 31.7, 29.2, 25.3, 22.8, 14.3, 12.6. HRMS (ESI)  $m/z$  calcd. for C<sub>14</sub>H<sub>23</sub>O<sub>4</sub> [M+H]<sup>+</sup> 255.1596; found 255.1591. IR (neat):  $\nu_{\max}/\text{cm}^{-1}$  2931, 2859, 1761, 1723, 1652, 1628, 1435, 1308, 1168.

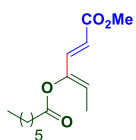

**Compound 5da** Following general procedure, **5da** was obtained as a pale yellow oil (8:2::pet ether:EtOAc) (32 mg, 0.142mmol, 71%). <sup>1</sup>H NMR (500 MHz, CDCl<sub>3</sub>)  $\delta$  7.17 (d,  $J$  = 15.5 Hz, 1 H), 5.83 (q,  $J$  = 7.3 Hz, 1 H), 5.74 (d,  $J$  = 15.5 Hz, 1 H), 3.74 (s, 3 H), 2.42 (d,  $J$  = 7.2 Hz, 2 H), 2.27 - 2.18 (m, 1 H), 1.69 (d,  $J$  = 7.2 Hz, 3 H), 1.05 (s, 3 H), 1.04 (s, 3 H). <sup>13</sup>C NMR (125 MHz, CDCl<sub>3</sub>):  $\delta$  169.9, 167.1, 145.4, 139.5, 126.0, 116.4, 51.8, 42.8, 25.7, 22.5(2C), 12.4. HRMS (ESI)  $m/z$  calcd. for C<sub>12</sub>H<sub>18</sub>O<sub>4</sub> [M+H]<sup>+</sup> 227.1283; found 227.1280. IR (neat):  $\nu_{\max}/\text{cm}^{-1}$  2959, 2874, 1760, 1723, 1653, 1628, 1466, 1307, 1169.

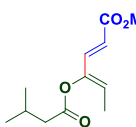

**Compound 5ea** Following general procedure, **5ea** was obtained as a white solid (8:2::pet ether:EtOAc) (25mg, 0.086mmol, 43%). <sup>1</sup>H NMR (400 MHz, CDCl<sub>3</sub>)  $\delta$  7.27 (d,  $J$  = 15.9 Hz, 1 H), 6.94 (s, 2 H), 5.98 - 5.88 (m, 2 H), 3.75 (s, 3 H), 2.47 (s, 6 H), 2.33 (s, 3 H), 1.85 (d,  $J$  = 6.7 Hz, 3 H). <sup>13</sup>C NMR (125 MHz, CDCl<sub>3</sub>):  $\delta$  167.4, 166.8, 145.9, 140.7, 140.1, 136.9(2C), 129.5(2C), 129.1, 126.6, 117.0, 52.1, 21.5, 21.4(2C), 13.3. HRMS (ESI)  $m/z$  calcd. for C<sub>17</sub>H<sub>24</sub>NO<sub>4</sub> [M+NH<sub>4</sub>]<sup>+</sup> 306.1705; found 306.1705. IR (neat):  $\nu_{\max}/\text{cm}^{-1}$  2923, 2852, 1725, 1612, 1651, 1435, 1307, 1234, 1165, 1052.

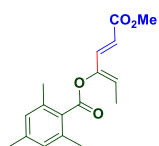

**Compound 5fa** Following general procedure, **5fa** was obtained as a white solid (8:2::pet ether:EtOAc) (29 mg, 0.096 mmol, 48%). <sup>1</sup>H NMR (400 MHz, CDCl<sub>3</sub>)  $\delta$  7.18 (d,  $J$  = 15.9 Hz, 1 H), 5.81 (q,  $J$  = 7.3 Hz, 1 H), 5.70 (d,  $J$  = 15.9 Hz, 1 H), 3.75 (s, 3 H), 2.09 (br. s., 3 H), 2.07 (br. s, 6 H), 1.77 (br. s, 6 H), 1.66 (d,  $J$  = 6.7 Hz, 3 H). <sup>13</sup>C NMR (125 MHz, CDCl<sub>3</sub>):  $\delta$  174.7, 167.4, 145.6, 139.9, 126.2, 116.4, 52.0, 41.6, 39.3(3C), 36.7(3C), 28.2(3C), 12. HRMS (ESI)  $m/z$  calcd. for C<sub>18</sub>H<sub>24</sub>O<sub>4</sub> [M+NH<sub>4</sub>]<sup>+</sup> 322.2018; found 322.2019. IR (neat):  $\nu_{\max}/\text{cm}^{-1}$  2909, 2853, 1750, 1722, 1651, 1627, 1453, 1435, 1307, 1201, 1180, 1167.

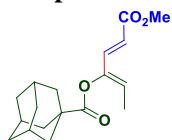

**Compound 5ga** Following general procedure, **5ga** was obtained as a pale yellow oil (8:2::pet ether:EtOAc) (24 mg, 0.13 mmol, 65%). <sup>1</sup>H NMR (500 MHz, CDCl<sub>3</sub>)  $\delta$  7.17 (d,  $J$  = 15.6 Hz, 1 H), 5.82 (q,  $J$  = 7.2 Hz, 1 H), 5.77 (d,  $J$  = 15.5 Hz, 1 H), 3.75 (s, 3 H), 2.28 (s, 3 H), 1.70 (d,  $J$  = 7.2 Hz, 3 H). <sup>13</sup>C NMR (125 MHz, CDCl<sub>3</sub>):  $\delta$  167.8, 167.0, 145.4, 139.2, 126.1, 116.5, 51.8, 20.4, 12.3. HRMS (ESI)  $m/z$  calcd. for C<sub>9</sub>H<sub>12</sub>O<sub>4</sub> [M+H]<sup>+</sup> 185.0814; found 185.0818. IR (neat):  $\nu_{\max}/\text{cm}^{-1}$  3058, 2953, 1762, 1723, 1653, 1628, 1436, 1310, 1200, 1171.

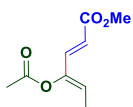

NOESY shows that H<sub>a</sub> (5.80 - 5.86) and H<sub>b</sub> (7.19 - 7.15) are correlated. H<sub>c</sub> (5.76 - 5.78) and H<sub>d</sub> (1.70) are weakly correlated.

**Compound 5gb** Following general procedure, **5gb** was obtained as a pale yellow oil (8:2::pet ether:EtOAc) (32 mg, 0.140 mmol, 70%). <sup>1</sup>H NMR (500 MHz, CDCl<sub>3</sub>): δ 7.15 (d, *J* = 15.5 Hz, 1 H), 5.82 (q, *J* = 7.3 Hz, 1 H), 5.76 (d, *J* = 15.5 Hz, 1 H), 4.15 (t, *J* = 7.1 Hz, 3 H), 2.28 (s, 3 H), 1.69 (d, *J* = 7.3 Hz, 3 H), 1.66 - 1.63 (m, 2 H), 1.42 - 1.38 (m, 2 H), 0.94 (t, *J* = 7.1 Hz, 3 H). <sup>13</sup>C NMR (125 MHz, CDCl<sub>3</sub>): δ 168.1, 166.9, 145.8, 139.1, 126.0, 117.3, 64.8, 31.1, 20.6, 19.5, 14.0, 12.5. HRMS (ESI) *m/z* calcd. for C<sub>12</sub>H<sub>18</sub>O<sub>4</sub> [M+H]<sup>+</sup> 227.1283; found 227.1281. IR (neat):  $\nu_{\text{max}}$ /cm<sup>-1</sup> 2960, 2934, 2874, 1765, 1715, 1653, 1627, 1304, 1196, 1170.

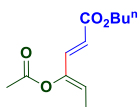

**Compound 5gc** Following general procedure, **5gc** was obtained as a pale yellow oil (8:2::pet ether:EtOAc) (31 mg, 0.136 mmol, 68%). <sup>1</sup>H NMR (500 MHz, CDCl<sub>3</sub>): δ 7.16 (d, *J* = 15.5 Hz, 1 H), 5.83 (q, *J* = 7.3 Hz, 1 H), 5.77 (d, *J* = 15.6 Hz, 1 H), 3.93 (d, *J* = 6.6 Hz, 2 H), 2.29 (s, 3 H), 2.00 - 1.92 (m, 1 H), 1.70 (d, *J* = 7.2 Hz, 3 H), 0.95 (d, *J* = 6.7 Hz, 6 H). <sup>13</sup>C NMR (125 MHz, CDCl<sub>3</sub>): δ 167.8, 166.6, 145.4, 138.8, 125.8, 116.9, 70.7, 27.8, 20.4, 19.1(2C), 12.2. HRMS (ESI) *m/z* calcd. for C<sub>12</sub>H<sub>18</sub>O<sub>4</sub> [M+H]<sup>+</sup> 227.1283; found 227.1282. IR (neat):  $\nu_{\text{max}}$ /cm<sup>-1</sup> 2962, 2928, 2875, 2854, 1765, 1718, 1627, 1653, 1470, 1371, 1211, 1197, 1168.

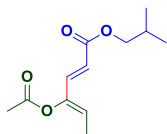

**Compound 5gd** Following general procedure, **5gd** was obtained as a white solid (8:2::pet ether:EtOAc) (32 mg, 0.128 mmol, 64%). <sup>1</sup>H NMR (500 MHz, CDCl<sub>3</sub>): δ 7.15 (d, *J* = 15.6 Hz, 1 H), 5.82 (q, *J* = 7.3 Hz, 1 H), 5.74 (d, *J* = 15.5 Hz, 1 H), 4.85 - 4.78 (m, 1 H), 2.28 (s, 3 H), 1.89 - 1.84 (m, 2 H), 1.74 (m, 2 H), 1.69 (d, *J* = 7.3 Hz, 3 H), 1.58 - 1.52 (m, 1 H), 1.44 - 1.36 (m, 4 H), 1.29 - 1.24 (m, 1 H). <sup>13</sup>C NMR (100 MHz, CDCl<sub>3</sub>): δ 167.8, 166.0, 145.5, 138.5, 125.6, 117.5, 72.9, 31.7(2C), 25.4, 23.8(2C), 20.4, 12.2. HRMS (ESI) *m/z* calcd. for C<sub>14</sub>H<sub>20</sub>O<sub>4</sub> [M+H]<sup>+</sup> 253.1440; found 253.1443. IR (neat):  $\nu_{\text{max}}$ /cm<sup>-1</sup> 2936, 2859, 1764, 1713, 1653, 1626, 1450, 1371, 1259, 1197, 1173.

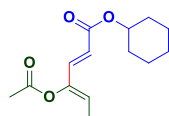

**Compound 5gh** Following general procedure, **5gh** was obtained as a pale yellow oil (8:2::pet ether:EtOAc) (29 mg, 0.144 mmol, 72%). <sup>1</sup>H NMR (500 MHz, CDCl<sub>3</sub>): δ 7.16 (d, *J* = 15.5 Hz, 1 H), 5.85 - 5.80 (m, 1 H), 5.75 (d, *J* = 15.6 Hz, 1 H), 4.20 (q, *J* = 7.2 Hz, 2 H), 2.28 (s, 3 H), 1.70 (d, *J* = 7.2 Hz, 3 H), 1.29 (t, *J* = 7.1 Hz, 3 H). <sup>13</sup>C NMR (125 MHz, CDCl<sub>3</sub>): δ 168.1, 166.8, 145.7, 139.2, 126.1, 117.2, 60.9, 20.7, 14.6, 12.5. HRMS (ESI) *m/z* calcd. for C<sub>10</sub>H<sub>14</sub>O<sub>4</sub> [M+NH<sub>4</sub>]<sup>+</sup> 216.1236; found 216.1233. IR (neat):  $\nu_{\text{max}}$ /cm<sup>-1</sup> 2982, 1764, 1714, 1652, 1628, 1369, 1305, 1197, 1175.

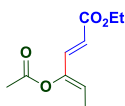

**Compound 5gi** Following general procedure, **5gi** was obtained as a white solid (8:2::pet ether:EtOAc) (40 mg, 0.148 mmol, 74%). <sup>1</sup>H NMR (500 MHz, CDCl<sub>3</sub>): δ 7.16 (d, *J* = 15.5 Hz, 1 H), 5.83 (q, *J* = 7.3 Hz, 1 H), 5.76 (d, *J* = 15.6 Hz, 1 H), 4.14 (t, *J* = 6.8 Hz, 2 H), 2.29 (s, 3 H), 1.70 (d, *J* = 7.3 Hz, 3 H), 1.67 - 1.64 (m, 2 H), 1.32 (m, 8 H), 0.89 (t, *J* = 7.0 Hz, 3 H). <sup>13</sup>C NMR (100 MHz, CDCl<sub>3</sub>): δ 168.1, 167.0, 145.7, 139.1, 126.1, 117.2, 65.1, 32.1, 29.3, 29.0, 26.2, 22.9, 20.7, 14.4, 12.5. HRMS (ESI) *m/z* calcd. for C<sub>15</sub>H<sub>24</sub>O<sub>4</sub> [M+H]<sup>+</sup> 269.1753; found 269.1757. IR (neat):  $\nu_{\text{max}}$ /cm<sup>-1</sup> 2925, 2855, 1727, 1651, 1627, 1453, 1435, 1307, 1261, 1180, 1167.

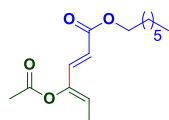

**Compound 5ge** Following general procedure, **5ge** was obtained as a white solid (8:2::pet ether:EtOAc) (40 mg, 0.108 mmol, 54%). <sup>1</sup>H NMR (400 MHz, CDCl<sub>3</sub>): δ 7.16 (d, *J* = 15.5 Hz, 1 H), 6.40 (dd, *J* = 1.4, 17.3 Hz, 1 H), 6.12 (dd, *J* = 10.5, 17.3 Hz, 1 H), 5.84 - 5.80 (m, 2 H), 5.75 (d, *J* = 15.5 Hz, 1 H), 4.17 - 4.12 (m, 4 H), 2.28 (s, 3 H), 1.70 (d, *J* = 7.3 Hz, 3 H), 1.68 - 1.63 (m, 4 H), 1.37 - 1.31 (m, 10 H). <sup>13</sup>C NMR (100 MHz, CDCl<sub>3</sub>): δ 167.8, 166.6, 166.4, 145.4, 138.8, 130.5, 128.7, 125.8, 116.9, 64.7, 64.7, 29.4, 29.2(2C), 28.7, 28.6, 25.9(2C), 20.4, 12.2. HRMS (ESI) *m/z* calcd. for C<sub>20</sub>H<sub>30</sub>O<sub>6</sub> [M+H]<sup>+</sup> 367.2121; found 367.2121. IR (neat):  $\nu_{\text{max}}$ /cm<sup>-1</sup> 2930, 2856, 1725 (br), 1636, 1465, 1408, 1371, 1370, 1302, 1288, 1297, 1272, 1196.

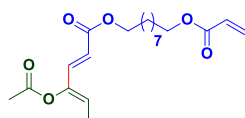

**Compound 5gj** Following general procedure, **5gj** was obtained as a white solid (8:2::pet ether:EtOAc) (48 mg, 0.156 mmol, 78%). <sup>1</sup>H NMR (400 MHz, CDCl<sub>3</sub>): δ 7.15 (d, *J* = 15.3 Hz, 1 H), 5.84 (q, *J* = 7.3 Hz, 1 H), 5.78 (d, *J* = 15.9 Hz, 1 H), 4.97 - 4.92 (m, 1 H), 2.42 - 2.34 (m, 1 H), 2.31 (s, 3 H), 2.01 - 1.93 (m, 1 H), 1.77 (ddd, *J* = 4.0, 7.6, 11.6 Hz, 1 H), 1.70 (d, *J* = 7.3 Hz, 3 H), 1.37 - 1.22 (m, 3 H), 1.01 (dd, *J* = 3.4, 13.7 Hz, 1 H), 0.92 (s, 3 H), 0.88 (s, 3 H), 0.85 (s, 3 H). <sup>13</sup>C NMR (100 MHz, CDCl<sub>3</sub>): δ 167.9, 166.9, 145.4, 138.5, 125.7, 117.4, 80.2, 48.9, 47.9, 44.9, 36.8, 28.0, 27.2, 20.4, 19.7, 18.9, 13.5, 12.2. HRMS (ESI) *m/z* calcd. for C<sub>18</sub>H<sub>26</sub>O<sub>4</sub> [M+NH<sub>4</sub>]<sup>+</sup> 324.2175; found 324.2177. IR (neat):  $\nu_{\text{max}}$ /cm<sup>-1</sup> 2924, 2864, 1750, 1722, 1651, 1627, 1453, 1435, 1307, 1201, 1180, 1167.  $[\alpha]_D^{30}$  = -20.68 (c = 0.81 in CHCl<sub>3</sub>).

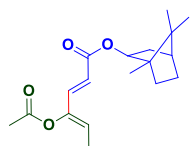

**Compound 5gk** Following general procedure, **5gk** was obtained as a white solid (8:2::pet ether:EtOAc) (42 mg, 0.160 mmol, 80%). <sup>1</sup>H NMR (400 MHz, CDCl<sub>3</sub>): δ 7.16 (d, *J* = 15.9 Hz, 1 H), 5.83 (q, *J* = 7.1 Hz, 1 H), 5.76 (d, *J* = 15.3 Hz, 1 H), 3.96 (d, *J* = 6.7 Hz, 2 H), 2.29 (s, 3 H), 1.76 - 1.66 (m, 10 H), 1.28 - 1.21 (m, 3 H), 1.02 - 0.98 (m, 1 H). <sup>13</sup>C NMR (100 MHz, CDCl<sub>3</sub>): δ 168.1, 167.0, 145.8, 139.1, 126.0, 117.3, 70.1, 37.5, 30.1(2C), 26.7, 26.0(2C), 20.7, 12.5. HRMS (ESI) *m/z* calcd. for C<sub>15</sub>H<sub>22</sub>O<sub>4</sub> [M+Na]<sup>+</sup> 289.1416; found 289.1418. IR (neat): ν<sub>max</sub>/cm<sup>-1</sup> 2928, 2854, 1766, 1715, 1651, 1627, 1450, 1370, 1305, 1288, 1196, 1168, 1023.

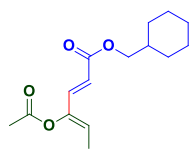

**Compound 5gl** Following general procedure, **5gl** was obtained as a white solid (8:2::pet ether:EtOAc) (43 mg, 0.14 mmol, 70%). <sup>1</sup>H NMR (400 MHz, CDCl<sub>3</sub>): δ 7.14 (d, *J* = 15.9 Hz, 1 H), 5.82 (q, *J* = 7.1 Hz, 1 H), 5.75 (d, *J* = 15.3 Hz, 1 H), 4.76 (dt, *J* = 4.3, 10.7 Hz, 1 H), 2.29 (s, 3 H), 2.04 - 1.98 (m, 1 H), 1.91 - 1.84 (m, 1 H), 1.69 [m, 4 H (3H + 1H)], 1.55 - 1.45 (m, 1 H), 1.43 - 1.36 (m, 1 H), 1.10 - 0.97 (m, 2 H), 0.92 - 0.88 (m, 8 H), 0.75 (d, *J* = 6.7 Hz, 3 H). <sup>13</sup>C NMR (100 MHz, CDCl<sub>3</sub>): δ 168.2, 166.4, 145.8, 138.9, 126.0, 117.6, 74.6, 47.5, 41.3, 34.6, 31.7, 26.5, 23.7, 22.4, 21.1, 20.7, 16.6, 12.5. HRMS (ESI) *m/z* calcd. for C<sub>18</sub>H<sub>28</sub>O<sub>4</sub> [M+Na]<sup>+</sup> 331.1885; found 331.1889. IR (neat): ν<sub>max</sub>/cm<sup>-1</sup> 2956, 2929, 2870, 1766, 1711, 1651, 1626, 1455, 1370, 1302, 1288, 1196, 1171. [α]<sub>D</sub><sup>30</sup> = -15.78 (c = 0.58 in CHCl<sub>3</sub>).

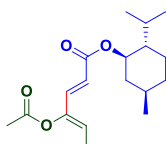

**Compound 5gm** Following general procedure, **5gm** was obtained as a brownish oil (8:2::pet ether:EtOAc) (29 mg, 0.116 mmol, 58%). <sup>1</sup>H NMR (500 MHz, CDCl<sub>3</sub>): δ 7.41 - 7.38 (m, 2 H), 7.36 (d, *J* = 15.5 Hz, 1 H), 7.26 - 7.22 (m, 1 H), 7.12 (d, *J* = 7.6 Hz, 2 H), 5.98 - 5.90 (m, 2 H), 2.33 (s, 3 H), 1.75 (d, *J* = 7.2 Hz, 3 H). <sup>13</sup>C NMR (125 MHz, CDCl<sub>3</sub>): δ 168.1, 165.3, 151.1, 145.8, 141.0, 129.8(2C), 127.4, 126.2, 121.9(2C), 116.4, 20.7, 12.7. HRMS (ESI) *m/z* calcd. for C<sub>14</sub>H<sub>14</sub>O<sub>4</sub> [M+H]<sup>+</sup> 247.0970; found 247.0973. IR (neat): ν<sub>max</sub>/cm<sup>-1</sup> 2924, 2854, 1762, 1731, 1649, 1626, 1493, 1371, 1290, 1192, 1141.

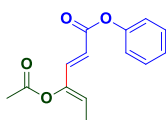

**Compound 5gn** Following general procedure, **5gn** was obtained as a white solid (8:2::pet ether:EtOAc) (36 mg, 0.138 mmol, 69%). <sup>1</sup>H NMR (500 MHz, CDCl<sub>3</sub>): δ 7.39 - 7.35 (m, 5 H), 7.21 (d, *J* = 15.5 Hz, 1 H), 5.86 - 5.80 (m, 2 H), 5.20 (s, 2 H), 2.27 (s, 3 H), 1.70 (d, *J* = 7.2 Hz, 3 H). <sup>13</sup>C NMR (125 MHz, CDCl<sub>3</sub>): δ 167.7, 166.4, 145.5, 139.5, 136.0, 128.7(2C), 128.4(2C), 128.4, 126.2, 116.6, 66.5, 20.4, 12.3. HRMS (ESI) *m/z* calcd. for C<sub>15</sub>H<sub>16</sub>O<sub>4</sub> [M+NH<sub>4</sub>]<sup>+</sup> 278.1392; found 278.1394. IR (neat): ν<sub>max</sub>/cm<sup>-1</sup> 3034, 2938, 1815, 1760, 1723, 1650, 1626, 1455, 1372, 1264, 1198, 1165.

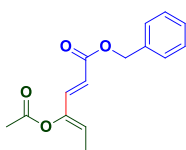

**Compound 5ag** Following general procedure, **5ag** was obtained as a white solid (8:2::pet ether:EtOAc) (43mg, 0.088 mmol, 44%). <sup>1</sup>H NMR (400 MHz, CDCl<sub>3</sub>): δ 7.88 (d, *J* = 7.3 Hz, 2 H), 7.62 (t, *J* = 7.3 Hz, 1 H), 7.53 (t, *J* = 7.6 Hz, 2 H), 7.19 (d, *J* = 14.6 Hz, 1 H), 6.20 (d, *J* = 14.6 Hz, 1 H), 5.95 (q, *J* = 7.3 Hz, 1 H), 2.47 (t, *J* = 7.6 Hz, 2 H), 1.69 (d, *J* = 7.1 Hz 3 H), 1.68 - 1.63 (m, 2 H), 1.31 - 1.25 (m, 28 H), 0.88 (t, *J* = 6.7 Hz, 3 H). <sup>13</sup>C NMR (100 MHz, CDCl<sub>3</sub>): δ 170.2, 143.6, 140.5, 137.8, 133.4, 129.3(2C), 128.8, 127.6(2C), 125.7, 33.8, 31.9, 29.7(6C), 29.6, 29.6, 29.4, 29.4, 29.2, 29.1, 24.9, 22.7, 14.2, 12.6. HRMS (ESI) *m/z* calcd. for C<sub>29</sub>H<sub>46</sub>O<sub>4</sub>S [M+NH<sub>4</sub>]<sup>+</sup> 508.3461; found 508.3463. IR (neat): ν<sub>max</sub>/cm<sup>-1</sup> 2923, 2853, 1763, 1652, 1601, 1447, 1308, 1192, 1147, 1112, 1085.

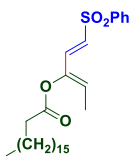

**Compound 5cg** Following general procedure, **5cg** was obtained as a white solid (8:2::pet ether:EtOAc) (34 mg, 0.10 mmol, 50%). <sup>1</sup>H NMR (500 MHz, CDCl<sub>3</sub>): δ 7.88 (d, *J* = 8.2 Hz, 2 H), 7.62 (t, *J* = 7.4 Hz, 1 H), 7.54 (t, *J* = 7.9 Hz, 2 H), 7.19 (d, *J* = 14.9 Hz, 1 H), 6.20 (d, *J* = 14.9 Hz, 1 H), 5.95 (q, *J* = 7.3 Hz, 1 H), 2.48 (t, *J* = 7.6 Hz, 2 H), 1.70 (d, *J* = 7.2 Hz, 3 H), 1.68 - 1.64 (m, 2 H), 1.34 - 1.27 (m, 6 H), 0.90 - 0.86 (m, 3 H). <sup>13</sup>C NMR (100 MHz, CDCl<sub>3</sub>): δ 170.2, 143.6, 140.5, 137.8, 133.5, 129.3(2C), 128.8, 127.6 (2C), 125.7, 33.8, 31.3, 28.8, 24.9, 22.4, 14.0, 12.6. HRMS (ESI) *m/z* calcd. for C<sub>18</sub>H<sub>24</sub>O<sub>4</sub>S [M+NH<sub>4</sub>]<sup>+</sup> 354.1739; found 354.1737. IR (neat): ν<sub>max</sub>/cm<sup>-1</sup> 2923, 2853, 1721, 1650, 1661, 1447, 1308, 1147, 1084, 1025.

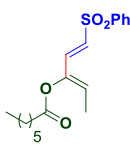

**Compound 5gg** Following general procedure, **5gg** was obtained as a white solid (8:2::pet ether:EtOAc) (28.19 mg, 0.106 mmol, 53%). <sup>1</sup>H NMR (500 MHz, CDCl<sub>3</sub>): δ 7.88 (d, *J* = 8.2 Hz, 2 H), 7.62 (t, *J* = 7.4 Hz, 1 H), 7.54 (t, *J* = 7.9 Hz, 2 H), 7.19 (d, *J* = 14.9 Hz, 1 H), 6.23 (d, *J* = 14.9 Hz, 1 H), 5.96 (q, *J* = 7.2 Hz, 1 H), 2.23 (s, 3 H), 1.71 (d, *J* = 7.3 Hz, 3 H). <sup>13</sup>C NMR (125 MHz, CDCl<sub>3</sub>): δ 167.6, 144.0, 140.8, 137.9, 133.8, 129.7(2C), 129.2, 128.0 (2C), 126.2, 20.6, 12.9. HRMS (ESI) *m/z* calcd. for C<sub>13</sub>H<sub>14</sub>O<sub>4</sub>S [M+NH<sub>4</sub>]<sup>+</sup> 284.0957; found 284.0954. IR (neat): ν<sub>max</sub>/cm<sup>-1</sup> 2923, 2852, 1762, 1652, 1600, 1447, 1371, 1306, 1194, 1145, 1085, 1023.

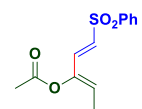

## Procedure for Isomerization of Allylsilanes:

A 8 mL screw-cap vial was charged with  $[\text{RuCl}_2(\text{p-cymene})]_2$  (6.1 mg, 0.01 mmol, 5.0 mol%),  $\text{Cu}(\text{OAc})_2 \cdot \text{H}_2\text{O}$  (80 mg, 0.4 mmol, 2.0 equiv),  $\text{AgSbF}_6$  (14 mg, 0.04 mmol, 20 mol%) and 1,2-dichloroethane (1.5 mL). Then allylsilane (0.2 mmol, 1.0 equiv) was added into the solution. The vial was sealed under  $\text{N}_2$  and heated to  $80^\circ\text{C}$  with stirring for 12 h. After cooling down, the mixture was diluted with dichloromethane, filtered and concentrated to give the crude compound which was directly purified by column chromatography using only pentane as a eluent.

**Compound 6b** Following general procedure, **6b** was obtained as a colourless oil (using pentane as a eluent) (34 mg, 0.174 mmol, 87%).  $^1\text{H}$  NMR (500 MHz,  $\text{CDCl}_3$ ):  $\delta$  7.21 (t,  $J = 7.2$  Hz, 2 H), 7.07 (t,  $J = 6.9$  Hz, 1 H), 7.00 (d,  $J = 7.4$  Hz, 2 H), 6.12 - 5.99 (m, 1 H), 5.63 (d,  $J = 20$  Hz, 1 H), 2.11 (s, 2 H), 1.81 (d,  $J = 6.3$  Hz, 3 H), 0.02 (s, 6 H).  $^{13}\text{C}$  NMR (125 MHz,  $\text{CDCl}_3$ ):  $\delta$  143.7, 140.6, 129.8, 128.6, 128.4, 124.2, 26.5, 23.0, -3.0. HRMS (ESI)  $m/z$  calcd. for  $\text{C}_{12}\text{H}_{18}\text{Si}$   $[\text{M}+\text{H}]^+$  191.1256; found 191.1258. IR (neat):  $\nu_{\text{max}}/\text{cm}^{-1}$  3078, 3022, 2988, 2953, 2849, 1799, 1618, 1599, 1492, 1247, 1055, 831, 697.

**Compound 6c** Following general procedure, **6c** was obtained as a colourless oil (using pentane as a eluent) (26 mg, 0.166 mmol, 83%).  $^1\text{H}$  NMR (500 MHz,  $\text{CDCl}_3$ ):  $\delta$  6.05 (qd,  $J = 6.0, 18.5$  Hz, 1 H), 5.67 - 5.60 (m, 1 H), 1.85 - 1.79 (m, 3 H), 0.85 (s, 9 H), -0.01 (s, 7 H).  $^{13}\text{C}$  NMR (125 MHz,  $\text{CDCl}_3$ ):  $\delta$  143.3, 128.6, 26.5, 22.8, 16.5, -6.0. HRMS (ESI)  $m/z$  calcd. for  $\text{C}_9\text{H}_{20}\text{Si}$   $[\text{M}+\text{H}]^+$  157.1413; found 157.1416. IR (neat):  $\nu_{\text{max}}/\text{cm}^{-1}$  2923, 2852, 1600, 1371, 1234, 1050, 827, 720.

**Compound 6d** Following general procedure, **6d** was obtained as a colourless oil (using pentane as a eluent) (50 mg, 0.18 mmol, 90%).  $^1\text{H}$  NMR (500 MHz,  $\text{CDCl}_3$ ): 7.67 - 7.59 (m, 4 H), 7.43 - 7.31 (m, 6 H), 6.17 - 6.00 (m, 2 H), 1.93 (d,  $J = 4.6$  Hz, 3 H), 1.09 (s, 9 H).  $^{13}\text{C}$  NMR (100 MHz,  $\text{CDCl}_3$ ):  $\delta$  147.8, 136.4, 135.2, 129.0, 127.6, 124.7, 27.8, 23.1, 18.2. HRMS (ESI)  $m/z$  calcd. for  $\text{C}_{19}\text{H}_{24}\text{Si}$   $[\text{M}+\text{H}]^+$  281.1726; found 281.1723. IR (neat):  $\nu_{\text{max}}/\text{cm}^{-1}$  3082, 3035, 2992, 2949, 2901, 1601, 1592, 1567, 1492, 1282, 1012, 845, 693.

**Compound 6e** Following general procedure, **6e** was obtained as a colourless oil (using pentane as a eluent) (34 mg, 0.17 mmol, 90%).  $^1\text{H}$  NMR (500 MHz,  $\text{CDCl}_3$ ): 7.67 - 7.59 (m, 4 H), 7.43 - 7.31 (m, 6 H), 6.17 - 6.00 (m, 2 H), 1.93 (d,  $J = 4.6$  Hz, 3 H), 1.09 (s, 9 H).  $^{13}\text{C}$  NMR (100 MHz,  $\text{CDCl}_3$ ):  $\delta$  147.8, 136.4, 135.2, 129.0, 127.6, 124.7, 27.8, 23.1, 18.2. HRMS (ESI)  $m/z$  calcd. for  $\text{C}_{12}\text{H}_{26}\text{Si}$   $[\text{M}+\text{H}]^+$  199.1882; found 199.1886. IR (neat):  $\nu_{\text{max}}/\text{cm}^{-1}$  2946, 2893, 1593, 1299, 1203, 1001, 819, 725.

## Procedure for Deuterium study:

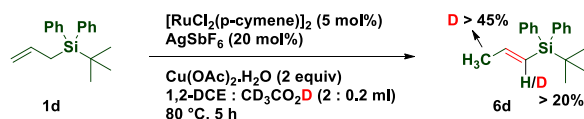

A 8 mL screw-cap vial was charged with  $[\text{RuCl}_2(\text{p-cymene})]_2$  (11 mg, 0.017 mmol, 5.0 mol%),  $\text{Cu}(\text{OAc})_2 \cdot \text{H}_2\text{O}$  (143 mg, 0.71 mmol, 2.0 equiv),  $\text{AgSbF}_6$  (24.5 mg, 0.07 mmol, 20 mol%), 1,2-dichloroethane (2 mL) and  $\text{CD}_3\text{CO}_2\text{D}$  (0.2 mL). Then Diphenyltertiarybutyl allylsilane **1d** (0.2 mmol, 1.0 equiv) was added into the solution. The vial was sealed under  $\text{N}_2$  and heated to  $80^\circ\text{C}$  with stirring for 5 h. After cooling down, the mixture was diluted with dichloromethane, filtered and concentrated to give the crude compound which was directly purified by column chromatography using only pentane as a eluent to afford compound **6d**. It was found that deuterium scrambling at the  $\alpha$ -position ( $> 20\%$ ) as well as at the methyl group ( $> 45\%$ ) in vinylsilane.

## Coupling reaction between vinylsilane 6b and methyl acrylate 2a:

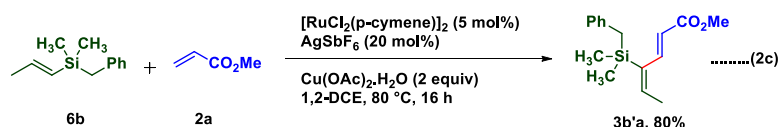

A 8 mL screw-cap vial was charged with  $[\text{RuCl}_2(\text{p-cymene})]_2$  (11 mg, 0.017 mmol, 5.0 mol%),  $\text{Cu}(\text{OAc})_2 \cdot \text{H}_2\text{O}$  (143 mg, 0.71 mmol, 2.0 equiv),  $\text{AgSbF}_6$  (24.5 mg, 0.07 mmol, 20 mol%) and 1,2-dichloroethane (2 mL). Then vinylsilane **6b** (70 mg,

0.4 mmol, 1.2 equiv) and methyl acrylate **2a** (30 mg, 0.35 mmol, 1.0 equiv) were added into the solution. The vial was sealed under N<sub>2</sub> and heated to 80 °C with stirring for 16 h. After cooling down, the mixture was diluted with dichloromethane, filtered and concentrated to give the crude compound which was directly purified by column chromatography using 30:1 pet:ether:EtOAc as a eluent to afford compound **3b'a** (77 mg, 0.28 mmol, 80%).

<sup>1</sup>H NMR (400 MHz, CDCl<sub>3</sub>) δ 7.36 (d, *J* = 15.9 Hz, 1 H), 7.18 (t, *J* = 7.6 Hz, 2 H), 7.06 (t, *J* = 7.3 Hz, 1 H), 6.96 (d, *J* = 6.7 Hz, 2 H), 6.68 - 6.47 (m, 1 H), 5.75 (d, *J* = 15.9 Hz, 1 H), 3.72 (s, 3 H), 2.25 (s, 2 H), 1.75 (d, *J* = 7.3 Hz, 3 H), 0.19 (s, 6 H). <sup>13</sup>C NMR (125 MHz, CDCl<sub>3</sub>) δ 167.8, 151.9, 146.8, 139.3, 136.8, 128.3, 128.3, 124.4, 117.1, 51.5, 26.1, 18.4, -1.3.

### Procedure for Diels-Alder reaction:

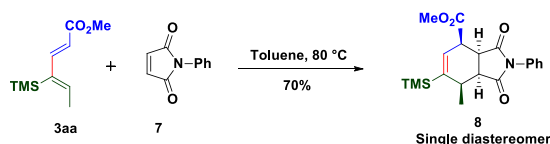

Compound **3aa** (100 mg, 0.5 mmol, 1.0 equiv.) and N-phenyl maleimide **7** (88 mg, 0.5 mmol, 1.0 equiv.) were taken in 8 mL screw-cap vial and Toluene (1.5 mL) was added. Then reaction mixture was heated at 80 °C for 15 h. After cooling down, Toluene was removed under reduced pressure and crude compound was directly purified by column chromatography using 0 - 20% EtOAc in Pet ether as a eluent to afford single diastereomer **8** (130 mg, 0.35 mmol) in 70% yield.

### Compound 8:

<sup>1</sup>H NMR (500 MHz, CDCl<sub>3</sub>): δ 7.44 - 7.38 (m, 2 H), 7.36 - 7.31 (m, 1 H), 7.19 - 7.13 (m, 2 H), 6.67 (dd, *J* = 2.6, 3.7 Hz, 1 H), 3.80 (s, 3 H), 3.77 - 3.69 (m, 1 H), 3.33 - 3.25 (m, 1 H), 3.23 - 3.15 (m, 1 H), 2.67 (t, *J* = 6.9 Hz, 1 H), 1.56 (d, *J* = 7.4 Hz, 3 H), 0.13 (s, 9 H). <sup>13</sup>C NMR (125 MHz, CDCl<sub>3</sub>): δ 176.5, 176.4, 171.4, 148.0, 135.3, 131.8, 129.1, 128.6, 126.5, 52.4, 44.6, 42.9, 41.1, 35.6, 16.7, -0.1. HRMS (ESI) *m/z* calcd. for C<sub>20</sub>H<sub>25</sub>NO<sub>4</sub>Si [M+H]<sup>+</sup> 372.1631; found 372.1634. IR (neat): ν<sub>max</sub>/cm<sup>-1</sup> 2951, 2922, 2849, 1739, 1709, 1499, 1455, 1382, 1276, 1247, 1201, 1036, 923, 834, 690.

## 2.2. Gram scale synthesis and its applications

### 2.2a. Synthesis of compound 3gh

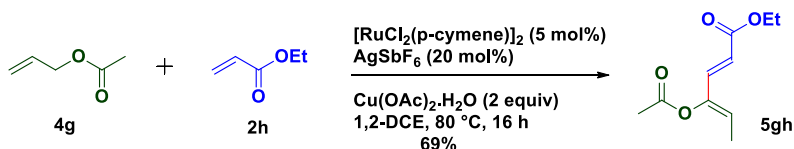

By following the general procedure, A 100 mL seal tube was charged with [RuCl<sub>2</sub>(p-cymene)]<sub>2</sub> (307 mg, 0.5 mmol, 5.0 mol%), Cu(OAc)<sub>2</sub>·H<sub>2</sub>O (4.0 g, 20 mmol, 2.0 equiv), AgSbF<sub>6</sub> (685 mg, 2.0 mmol, 20 mol%) and 1,2-dichloroethane (30 mL). Then ethyl acrylate **2h** (1.0 g, 1.06 mL, 10 mmol, 1.0 equiv) and allyl acetate **4g** (1.2 g, 1.3 mL, 12 mmol, 1.2 equiv) were added into the solution in sequence. Then vial was sealed under N<sub>2</sub> and heated to 80 °C with stirring for 16 h. After cooling down, the mixture was diluted with ethyl acetate, filtrated and concentrated to give the crude compound which was directly purified by column chromatography (8:2 petroleum ether/ethyl acetate) to give **5gh** as a colourless oil (1.36 g, 6.9 mmol, 69%).

### 2.2b. Synthesis of compound 9

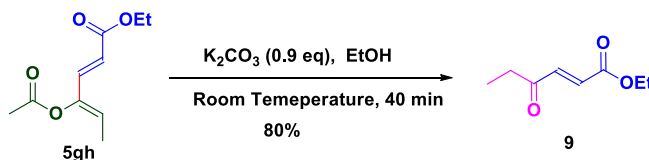

To a solution of **5gh** (1.3 g, 6.5 mmol, 1.0 equiv) in ethanol (15 mL), added potassium carbonate (815 mg, 5.9 mmol, 0.9 equiv) in four portions over 5 min and reaction mixture was allowed to stirred for 40 minutes at room temperature. Then reaction mixture was quenched with water and extracted with ethyl acetate (15 mL X 3), washed with brine, dried over anhydrous Na<sub>2</sub>SO<sub>4</sub>, concentrated *in vacuo* and purified by column chromatography (7:3 petroleum ether/ethyl acetate) furnishing the enone **9** (816 mg, 5.2 mmol, 80%) as a yellow liquid.

### (E)-ethyl 4-oxohex-2-enoate (**9**)

$^1\text{H}$  NMR (400 MHz,  $\text{CDCl}_3$ ):  $\delta$  7.06 (d,  $J$  = 16.5 Hz, 1 H), 6.67 (d,  $J$  = 15.9 Hz, 1 H), 4.26 (q,  $J$  = 7.3 Hz, 2 H), 2.67 (q,  $J$  = 7.3 Hz, 2 H), 1.32 (t,  $J$  = 7.1 Hz, 3 H), 1.13 (t,  $J$  = 7.3 Hz, 3 H).  $^{13}\text{C}$  NMR (101 MHz,  $\text{CDCl}_3$ ):  $\delta$  200.2, 165.6, 139.2, 130.6, 61.4, 34.8, 14.1, 7.6. HRMS (ESI)  $m/z$  calcd. for  $\text{C}_8\text{H}_{12}\text{O}_3$   $[\text{M}+\text{NH}_4]^+$  174.1130; found 174.1139. IR (neat):  $\nu_{\text{max}}/\text{cm}^{-1}$  2982, 2939, 1727, 1704, 1688, 1641, 1304, 1185.

### 2.2c. Synthesis of compound **13**<sup>1</sup>

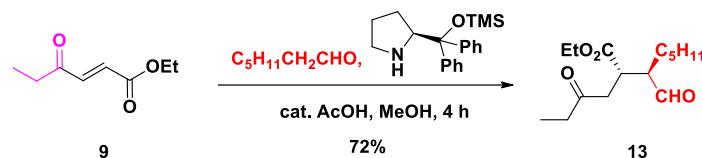

To a suspension of catalyst (52 mg, 0.16 mmol, 0.1 equiv), enone **9** (250 mg, 1.60 mmol, 1 equiv) and acetic acid (10  $\mu\text{l}$ , 0.16 mmol, 0.1 equiv) in methanol (7 ml) was added heptaldehyde (0.45 ml, 365 mg, 3.2 mmol, 2 equiv) at 0 °C. The reaction mixture was stirred for 1 h at the same temperature and then warmed to room temperature for 3 h. The solution was partitioned between ethyl acetate and saturated  $\text{NaHCO}_3$ . The organic phase was separated and aqueous phase was extracted with ethyl acetate. The combined organic layers were dried over  $\text{Na}_2\text{SO}_4$  and concentrated. Purification of the residue by flash column chromatography (silica gel) eluting with 10:1 petroleum ether/ethyl acetate afforded the Michael adduct **13** (310 mg, 1.152 mmol, 72%) as a pale-yellow liquid.

### (2R,3S)-ethyl 3-formyl-2-(2-oxobutyl)octanoate (**13**)

$^1\text{H}$  NMR (400 MHz,  $\text{CDCl}_3$ ):  $\delta$  9.61 (s, 1 H), 4.13 (q,  $J$  = 7.3 Hz, 2 H), 3.37 - 3.28 (m, 1 H), 2.97 (dd,  $J$  = 9.8, 17.7 Hz, 1 H), 2.65 - 2.57 (m, 1 H), 2.51 - 2.44 (m, 2 H), 2.42 - 2.36 (m, 1 H), 1.33 - 1.26 (m, 8 H), 1.23 (s, 3 H), 1.05 (t,  $J$  = 7.3 Hz, 3 H), 0.87 (s, 3 H).  $^{13}\text{C}$  NMR (101 MHz,  $\text{CDCl}_3$ ):  $\delta$  209.0, 202.7, 173.1, 61.1, 52.7, 40.7, 39.6, 36.1, 31.7, 27.1, 26.2, 22.4, 14.1, 13.9, 7.7. HRMS (ESI)  $m/z$  calcd. for  $\text{C}_{15}\text{H}_{26}\text{O}_4$   $[\text{M}-\text{H}]^-$  269.1757; found 269.1753. IR (neat):  $\nu_{\text{max}}/\text{cm}^{-1}$  2957, 2932, 2860, 1725 (br), 1461, 1376, 1212, 1179, 1115.  $[\alpha]_{\text{D}}^{30}$  = +12.68 ( $c$  = 1.6 in  $\text{CHCl}_3$ ).

### 2.2d. Synthesis of compound **11**<sup>1</sup>

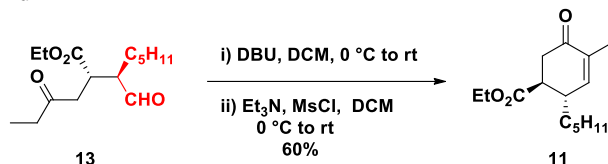

To a solution of Michael adduct **13** (100 mg, 0.37 mmol) in 4 mL of DCM, was added DBU (113  $\mu\text{l}$ , 0.74 mmol, 2.0 equiv) at 0 °C. After it was stirred for 1 h at 0 °C, the solution was warmed to room temperature and stirred for 2 h. The reaction mixture was partitioned between ethyl acetate and brine. The organic phase was separated and aqueous phase was extracted with ethyl acetate. The combined organic layers were dried over  $\text{Na}_2\text{SO}_4$  and concentrated. The residue was purified by flash column chromatography (silicagel, 10:1 petroleum ether/ethyl acetate as eluent) to give the corresponding cyclohexanone.

To a solution of aldol reaction product (70 mg, 0.25 mmol) in DCM (3 mL) were added  $\text{MsCl}$  (60  $\mu\text{l}$ , 0.77 mmol, 3.0 equiv) and  $\text{Et}_3\text{N}$  (0.19 ml, 1.5 mmol, 6.0 equiv) at 0 °C. After the reaction mixture was stirred for 1 h at 0 °C, and 6 h at 25 °C, it was partitioned between ethyl acetate and brine. The organic phase was separated and aqueous phase was extracted with ethyl acetate. The combined organic layers were dried over  $\text{Na}_2\text{SO}_4$  and concentrated. The residual oil was purified via flash column chromatography (silica gel, 20:1 petroleum ether/ethyl acetate as eluent) to afford the corresponding cyclohexenone **11** (38 mg, 0.15 mmol, 60%).

### (1S, 2S)-ethyl 4-methyl-5-oxo-2-pentylcyclohex-3-enecarboxylate (**11**)

$^1\text{H}$  NMR (400 MHz,  $\text{CDCl}_3$ ):  $\delta$  6.57 (br. s., 1 H), 4.15 (q,  $J$  = 6.9 Hz, 2 H), 2.86 - 2.75 (m, 2 H), 2.64 - 2.59 (m, 2 H), 1.77 (s, 3 H), 1.53 - 1.35 (m, 4 H), 1.30 (br. s., 4 H), 1.25 (d,  $J$  = 7.3 Hz, 3 H), 0.89 (t,  $J$  = 6.7 Hz, 3 H).  $^{13}\text{C}$  NMR (101 MHz,  $\text{CDCl}_3$ ):  $\delta$  197.4, 173.8, 147.8, 135.0, 61.2, 46.1, 39.3, 38.5, 33.5, 32.1, 26.5, 22.8, 16.1, 14.5, 14.3. HRMS (ESI)  $m/z$  calcd. for  $\text{C}_{15}\text{H}_{24}\text{O}_3$   $[\text{M}+\text{H}]^+$  253.1804; found 253.1806. IR (neat):  $\nu_{\text{max}}/\text{cm}^{-1}$  2957, 2928, 2859, 1733, 1682, 1454, 1377, 1276, 1175, 1032.  $[\alpha]_{\text{D}}^{30}$  = +68.6 ( $c$  = 0.70 in  $\text{CHCl}_3$ ).

### 2.2e. Synthesis of compound **12**<sup>1</sup>

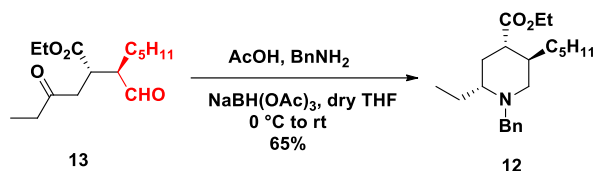

The Michael adduct **13** (100 mg, 0.37 mmol) was dissolved in 3 mL THF. To this solution  $\text{NaBH(OAc)}_3$  (235 mg, 1.11 mmol, 3.0 equiv), AcOH (23  $\mu\text{L}$ , 0.37 mmol, 1.0 equiv) and  $\text{BnNH}_2$  (60 mg, 61  $\mu\text{L}$ , 0.55 mmol, 1.5 equiv) were added at 0 °C. After it was stirred for 1 h at 0 °C, the solution was warmed to rt, and stirred for 2.5 hours. Then mixture was partitioned between ethyl acetate and saturated  $\text{NaHCO}_3$ . The organic phase was separated and aqueous phase was extracted with ethyl acetate. The combined organic layers were dried over  $\text{Na}_2\text{SO}_4$  and concentrated. Purification of the residue by flash column chromatography (silica gel, 20:1 petroleum ether/ethyl acetate as eluent) afforded the corresponding piperidine **12** (82.5 mg, 0.24 mmol, 65%).

### (2R,4S,5R)-ethyl 1-benzyl-2-ethyl-5-pentylpiperidine-4-carboxylate (**12**)

$^1\text{H}$  NMR (400 MHz,  $\text{CDCl}_3$ ):  $\delta$  7.32 - 7.28 (m, 3 H), 7.25 (br.s, 2 H), 4.17 - 4.11 (m, 2 H), 2.84 (d,  $J$  = 13.6 Hz, 1 H), 2.79 (dd,  $J$  = 2.7, 11.8 Hz, 1 H), 2.51 (td,  $J$  = 4.1, 13.1 Hz, 1 H), 2.12 - 2.07 (m, 1 H), 1.86 - 1.75 (m, 3 H), 1.73 - 1.61 (m, 4 H), 1.25 - 1.22 (m, 5 H), 1.20 - 1.15 (m, 3 H), 0.98 - 0.94 (m, 3 H), 0.92 - 0.86 (m, 3 H), 0.81 (t,  $J$  = 6.8 Hz, 3 H).  $^{13}\text{C}$  NMR (100 MHz,  $\text{CDCl}_3$ ):  $\delta$  175.1, 140.7, 128.8(2C), 128.4(2C), 126.9, 62.0, 60.4, 57.5, 55.6, 46.2, 36.9, 32.3, 28.0, 27.6, 26.9, 26.3, 22.9, 14.6, 14.4, 8.6. HRMS (ESI)  $m/z$  calcd. for  $\text{C}_{22}\text{H}_{35}\text{O}_2\text{N}$   $[\text{M}+\text{H}]^+$  346.2746; found 346.2735. IR (neat):  $\nu_{\text{max}}/\text{cm}^{-1}$  2957, 2929, 2873, 2856, 2791, 2754, 1732, 1453, 1377, 1338, 1254, 1237, 1185, 1169.  $[\alpha]_D^{30} = -29.2$  ( $c$  = 1.1 in  $\text{CHCl}_3$ ).

## 2.2f. Synthesis of compound 7<sup>2</sup>

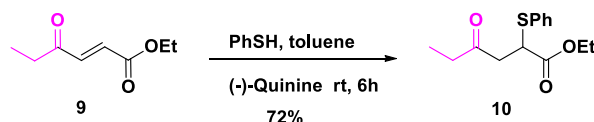

To a solution of thiophenol (39 mg, 36  $\mu\text{L}$ , 0.35 mmol, 1.1 equiv) and Quinine (10.5 mg, 0.032 mmol, 0.1 equiv) in toluene, was added enone **9** (50 mg, 0.32 mmol, 1 equiv) at rt and reaction mixture was allowed stirred for 6 h. Then reaction mixture was quenched with water and extracted with ethyl acetate (15 mL X 3), washed with brine, dried over anhydrous  $\text{Na}_2\text{SO}_4$ , concentrated *in vacuo* and purified by column chromatography furnishing the product **10** (61.2 mg, 0.23 mmol, 72%).

### Ethyl 4-oxo-2-(phenylthio)hexanoate (**10**)

$^1\text{H}$  NMR (400 MHz,  $\text{CDCl}_3$ ):  $\delta$  7.54 - 7.45 (m, 2 H), 7.37 - 7.29 (m, 3 H), 4.11 (q,  $J$  = 7.1 Hz, 2 H), 4.06 (dd,  $J$  = 4.6, 10.1 Hz, 1 H), 3.10 (dd,  $J$  = 10.4, 17.7 Hz, 1 H), 2.79 (dd,  $J$  = 4.6, 18.0 Hz, 1 H), 2.48 - 2.39 (m, 2 H), 1.17 (t,  $J$  = 7.3 Hz, 3 H), 1.05 (t,  $J$  = 7.3 Hz, 3 H).  $^{13}\text{C}$  NMR (100 MHz,  $\text{CDCl}_3$ ):  $\delta$  208.4, 171.9, 134.0 (2C), 132.7, 129.3 (2C), 128.8, 61.7, 45.1, 44.3, 36.3, 14.3, 7.9. HRMS (ESI)  $m/z$  calcd. for  $\text{C}_{14}\text{H}_{18}\text{O}_5\text{S}$   $[\text{M}+\text{Na}]^+$  289.0874; found 289.0878. IR (neat):  $\nu_{\text{max}}/\text{cm}^{-1}$  2979, 2938, 2906, 1731, 1582, 1439, 1369, 1223, 1173, 1153.

## 2.3. Synthesis of norpyrenophorin (**14**)

### 2.3a. Synthesis of compound 19

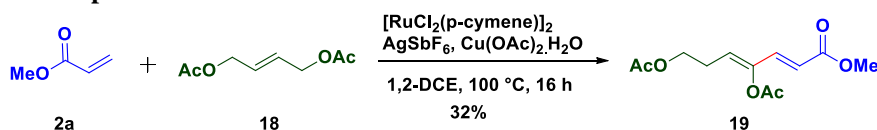

By following the general procedure, A 50 mL seal tube was charged with  $[\text{RuCl}_2(\text{p-cymene})]_2$  (179 mg, 5.83 mmol, 5.0 mol%),  $\text{Cu(OAc)}_2 \cdot \text{H}_2\text{O}$  (2.32 g, 11.6 mmol, 2.0 equiv),  $\text{AgSbF}_6$  (400 mg, 2.0 mmol, 20 mol%) and 1,2-dichloroethane (20 mL). Then methyl acrylate **2a** (250 mg, 2.90 mmol, 0.5 equiv) and diacetate **18** (1.0 g, 5.83 mmol, 1.0 equiv) were added into the solution in sequence. Then vial was sealed under  $\text{N}_2$  and heated to 100 °C with stirring for 16 h. After cooling down, the mixture was diluted with ethyl acetate, filtrated and concentrated to give the crude compound which was directly purified by column chromatography (3:1:: Pet ether : EtOAc) to give **19** (477 mg, 1.86 mmol, 32%).

### (3Z,5E)-7-methoxy-7-oxohepta-3,5-diene-1,4-diyl diacetate (**19**)

$^1\text{H}$  NMR (400 MHz,  $\text{CDCl}_3$ ):  $\delta$  7.17 (d,  $J$  = 15.9 Hz, 1 H), 5.83 - 5.73 (m, 2 H), 4.13 (t,  $J$  = 6.7 Hz, 2 H), 3.75 (s, 3 H), 2.42 (q,  $J$  = 6.9 Hz, 2 H), 2.28 (s, 3 H), 2.05 (s, 3 H).  $^{13}\text{C}$  NMR (101 MHz,  $\text{CDCl}_3$ ):  $\delta$  171.0, 167.8, 166.7, 146.0, 138.7, 125.9, 117.7, 62.3, 51.8, 26.4, 20.9, 20.3. HRMS (ESI)  $m/z$  calcd. for  $\text{C}_{12}\text{H}_{16}\text{O}_6$   $[\text{M}+\text{NH}_4]^+$  274.1291; found 274.1296. IR (neat):  $\nu_{\text{max}}/\text{cm}^{-1}$  2954, 2849, 1765, 1738, 1652, 1627, 1435, 1368, 1309, 1238, 1198, 1172, 1037.

### 2.3b. Synthesis of compound 20

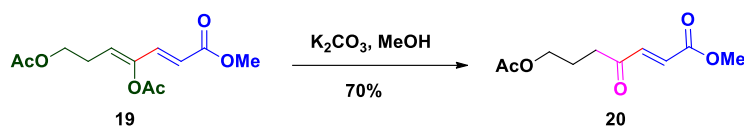

To a solution of **19** (450 mg, 1.75 mmol, 1.0 equiv) in methanol, added potassium carbonate (218 mg, 1.58 mmol, 0.9 equiv) in four portions over 5 min and reaction mixture was allowed to stirred for 40 minutes at room temperature. Then reaction mixture was quenched with water and extracted with ethyl acetate (15ml X 3), washed with brine, dried over anhydrous  $\text{Na}_2\text{SO}_4$ , concentrated *in vacuo* and purified by column chromatography (3 : 1.5 :: Pet ether : EtOAc) furnishing the compound **20** (262mg, 1.22mmol, 70%).

#### (E)-methyl 7-acetoxy-4-oxohept-2-enoate (20)

$^1\text{H}$  NMR (400 MHz,  $\text{CDCl}_3$ ):  $\delta$  7.08 (d,  $J$  = 16.0 Hz, 1 H), 6.70 (d,  $J$  = 16.0 Hz, 1 H), 4.10 (t,  $J$  = 6.3 Hz, 2 H), 3.82 (s, 3 H), 2.74 (t,  $J$  = 6.9 Hz, 2 H), 2.04 (s, 3 H), 2.02 - 1.97 (m, 2 H).  $^{13}\text{C}$  NMR (101 MHz,  $\text{CDCl}_3$ ):  $\delta$  198.5, 171.1, 166.0, 139.3, 130.6, 63.4, 52.5, 38.0, 22.7, 21.0. HRMS (ESI)  $m/z$  calcd. for  $\text{C}_{10}\text{H}_{14}\text{O}_5$   $[\text{M}+\text{Na}]^+$  237.0739; found 237.0730. IR (neat):  $\nu_{\text{max}}/\text{cm}^{-1}$  2956, 2853, 1737, 1731, 1703, 1643, 1437, 1366, 1305, 1241, 1176, 1040.

### 2.3c. Synthesis of compound 21

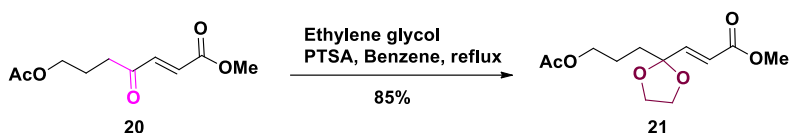

Using a Dean-Stark trap, ethylene glycol (1.3 ml, 23.36 mmol, 30 equiv.) was refluxed in benzene (5 mL) for 1 hour. Upon cooling, compound **20** (250 mg, 1.16 mmol) in benzene (2 mL) and p-toluene sulfonic acid (10 mg, 0.046 mmol, 0.04 equiv.) were added to the solution and the resulting mixture was heated to reflux under a condenser for 1.5 hours (heating for more than 1.5 hours resulted in decomposition of product). The solution was then cooled and quenched with  $\text{NaHCO}_3$  (10 mL). The resulting mixture was extracted with EtOAc (3 x 10 mL), washed with water (80 mL) and brine (80 mL), dried over  $\text{Na}_2\text{SO}_4$  and concentrated. The crude product was purified by column chromatography (3 : 1.5:: Pet ether : EtOAc) to obtain of the pure ketal **21** (254 mg, 0.986 mmol, 85% yield) as a yellow liquid.

#### (E)-methyl 3-(2-(3-acetoxypropyl)-1,3-dioxolan-2-yl)acrylate (21)

$^1\text{H}$  NMR (400 MHz,  $\text{CDCl}_3$ ):  $\delta$  6.73 (d,  $J$  = 15.6 Hz, 1 H), 6.09 (d,  $J$  = 15.8 Hz, 1 H), 4.07 (t,  $J$  = 6.4 Hz, 2 H), 4.00 - 3.95 (m, 2 H), 3.90 - 3.85 (m, 2 H), 3.76 (s, 3 H), 2.04 (s, 3 H), 1.85 - 1.78 (m, 2 H), 1.78 - 1.70 (m, 2 H).  $^{13}\text{C}$  NMR (101 MHz,  $\text{CDCl}_3$ ):  $\delta$  171.4, 166.9, 146.6, 121.9, 108.2, 65.3 (2C), 64.5, 52.1, 34.4, 22.8, 21.3. HRMS (ESI)  $m/z$  calcd. for  $\text{C}_{12}\text{H}_{18}\text{O}_6$   $[\text{M}+\text{Na}]^+$  281.1001; found 281.1000. IR (neat):  $\nu_{\text{max}}/\text{cm}^{-1}$  2955, 2895, 1731 (br.), 1663, 1436, 1387, 1365, 1305, 1243, 1197, 1169, 1036.

### 2.3d. Synthesis of compound 22

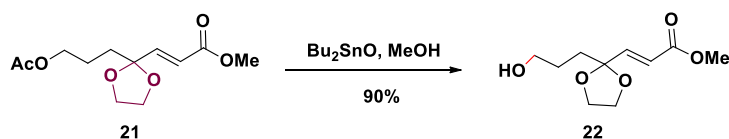

To a solution of **21** (240 mg, 0.930 mmol, 1.0 equiv) in methanol (8 ml), added dibutyl tin oxide (2.31 g, 5.9 mmol, 0.9 equiv) in one portion and reaction mixture was refluxed for 2 hours. Upon cooling the reaction mixture, concentrated *in vacuo*, solid was removed by filtration, residue washed with ethyl acetate and filterate was concentrated, purified by column chromatography (3 : 2 :: Pet ether : EtOAc) furnishing the product **22** (216 mg, 0.93 mmol, 90%) as a pale brownish liquid.

#### (E)-methyl 3-(2-(3-hydroxypropyl)-1,3-dioxolan-2-yl)acrylate (22)

$^1\text{H}$  NMR (400 MHz,  $\text{CDCl}_3$ ):  $\delta$  6.73 (d,  $J$  = 15.4 Hz, 1 H), 6.07 (d,  $J$  = 15.4 Hz, 1 H), 4.00 - 3.96 (m, 2 H), 3.89 - 3.85 (m, 2 H), 3.74 (s, 3 H), 3.63 (t,  $J$  = 5.9 Hz, 2 H), 2.03 (br. s., 1 H), 1.87 - 1.82 (m, 2 H), 1.69 - 1.64 (m, 2 H).  $^{13}\text{C}$  NMR (101 MHz,  $\text{CDCl}_3$ ):  $\delta$  166.6, 146.3, 121.5, 108.1, 64.9 (2C), 62.5, 51.8, 34.1, 26.2. HRMS (ESI)  $m/z$  calcd. for  $\text{C}_{10}\text{H}_{16}\text{O}_5$   $[\text{M}+\text{Na}]^+$  239.0895; found 239.0894. IR (neat):  $\nu_{\text{max}}/\text{cm}^{-1}$  3400 (br.), 2954, 2849, 1765, 1738, 1652, 1627, 1435, 1368, 1309, 1238, 1198, 1172, 1037.

### 2.3e. Synthesis of norpyrenophorin 14<sup>3</sup>

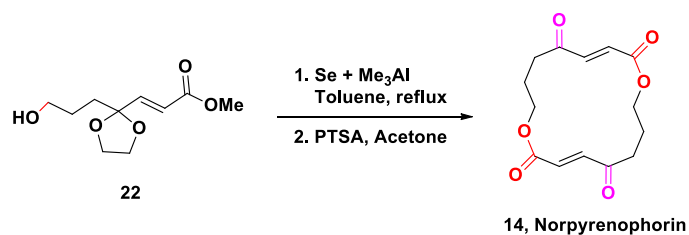

Trimethylaluminium (0.925 mL of a 2 M solution, 1.85 mmol, 10 equiv) in toluene was added to a 5 mL side-arm flask containing selenium powder (150 mg, 1.924 mmol, 10.4 equiv) at 0 °C and refluxed till the selenium powder had reacted completely, the resulting mixture was cooled to room temperature. An aliquot of Me<sub>2</sub>SeAlMe (10 µl, 1.1 mmol) was transferred by syringe to a solution containing compound **22** (40 mg, 0.185 mmol) in toluene (1.2 mL) at 0 °C. After 28 h of heating at reflux, the yellow solution was warmed to room temperature over a period of 30 min and treated with sodium carbonate. The solution was then diluted with dichloromethane, washed with water six times and treated with sodium hydrogen carbonate. The solution was then dried with brine and anhydrous magnesium sulfate. The solvent was removed under vacuum from the yellow solution and the residue was dissolved in acetone (0.75 mL), added p-toluene sulfonic acid (3 mg, 0.0081 mmol, 0.1 equiv) at 0 °C and stirred for 4 hours at room temperature. then reaction mixture was quenched with NaHCO<sub>3</sub> solution and extracted with EtOAc, dried over Na<sub>2</sub>SO<sub>4</sub> and concentrated. The crude product was purified by column chromatography (1:1 :: Pet ether : EtOAc) furnishing the **norpyrenophorin 14**<sup>3</sup> (6 mg, 0.0214 mmol, 23% in two steps).

#### Norpyrenophorin (14)

<sup>1</sup>H NMR (500 MHz, CDCl<sub>3</sub>): δ 7.03 (d, *J* = 16.3 Hz, 1 H), 6.68 (d, *J* = 16.2 Hz, 1 H), 4.31 (t, *J* = 5.9 Hz, 2 H), 2.85 (t, *J* = 7.0 Hz, 2 H), 2.13 - 2.07 (m, 2 H). <sup>13</sup>C NMR (101 MHz, CDCl<sub>3</sub>): δ 198.5, 165.4, 140.2, 131.2, 64.6, 37.2, 22.4. HRMS (ESI) *m/z* calcd. for C<sub>14</sub>H<sub>17</sub>O<sub>6</sub> [M+H]<sup>+</sup> 281.1025; found 281.1025. IR (neat): ν<sub>max</sub>/cm<sup>-1</sup> 2923, 2852, 1728, 1428, 1258.

### 3. NMR spectra

NAG1130P\_1H-4 (2).JDF

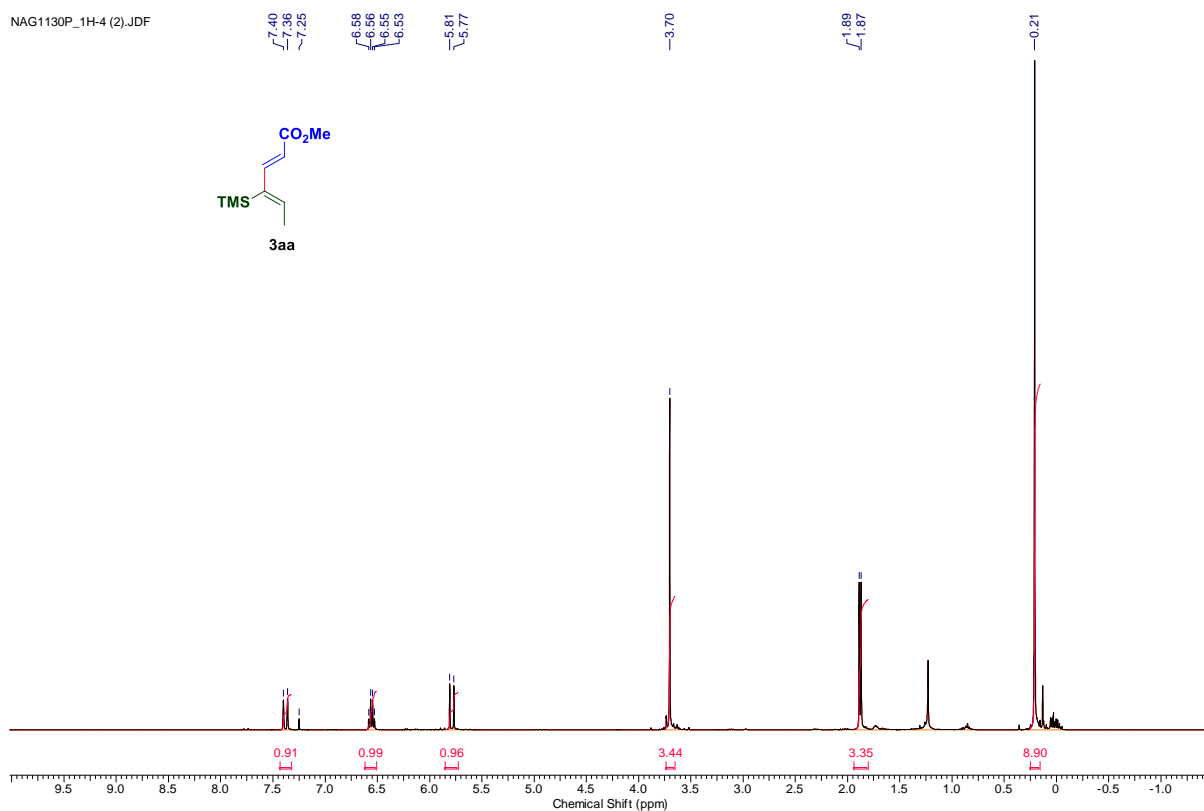

NAG1130P\_13C-2 (2).JDF

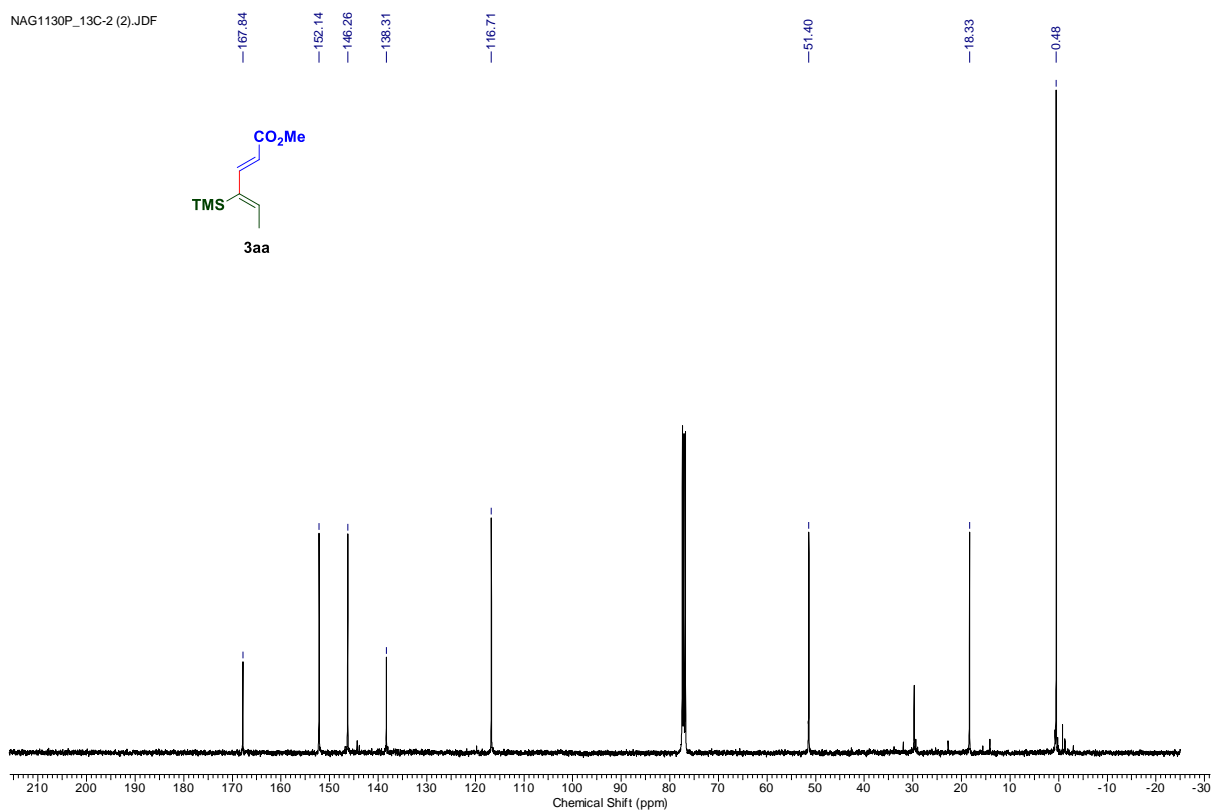

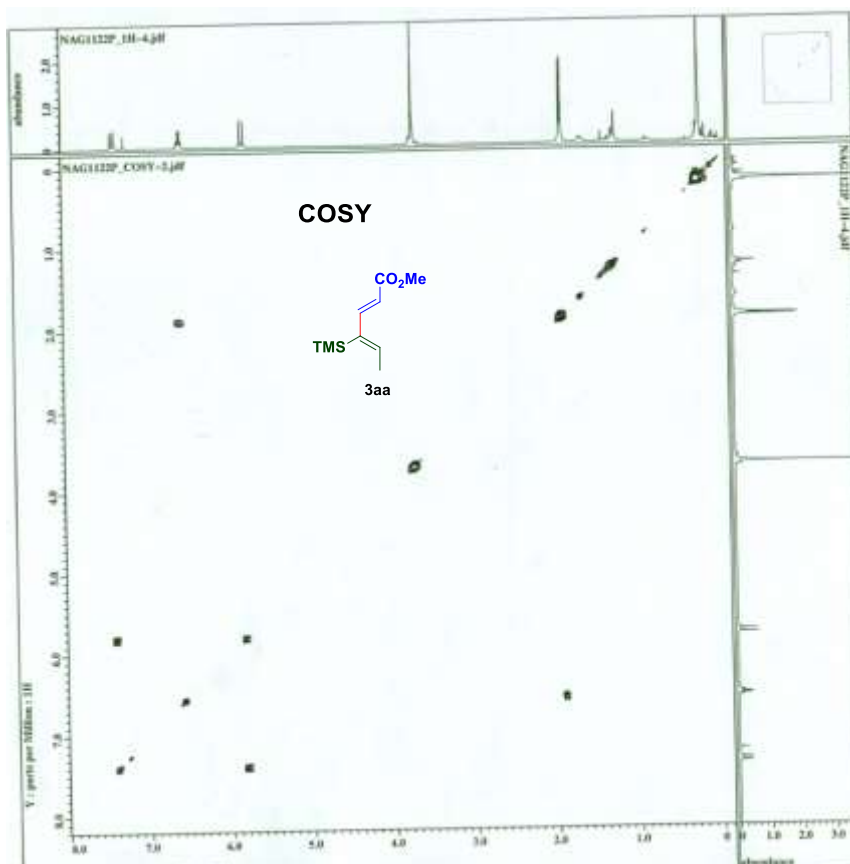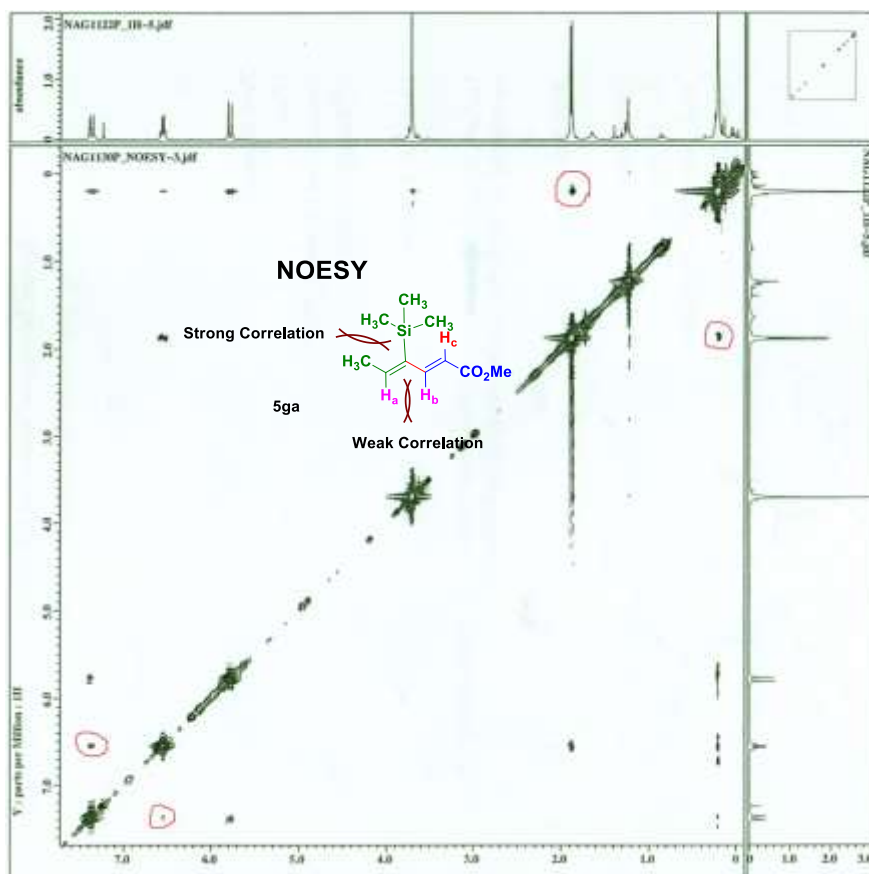

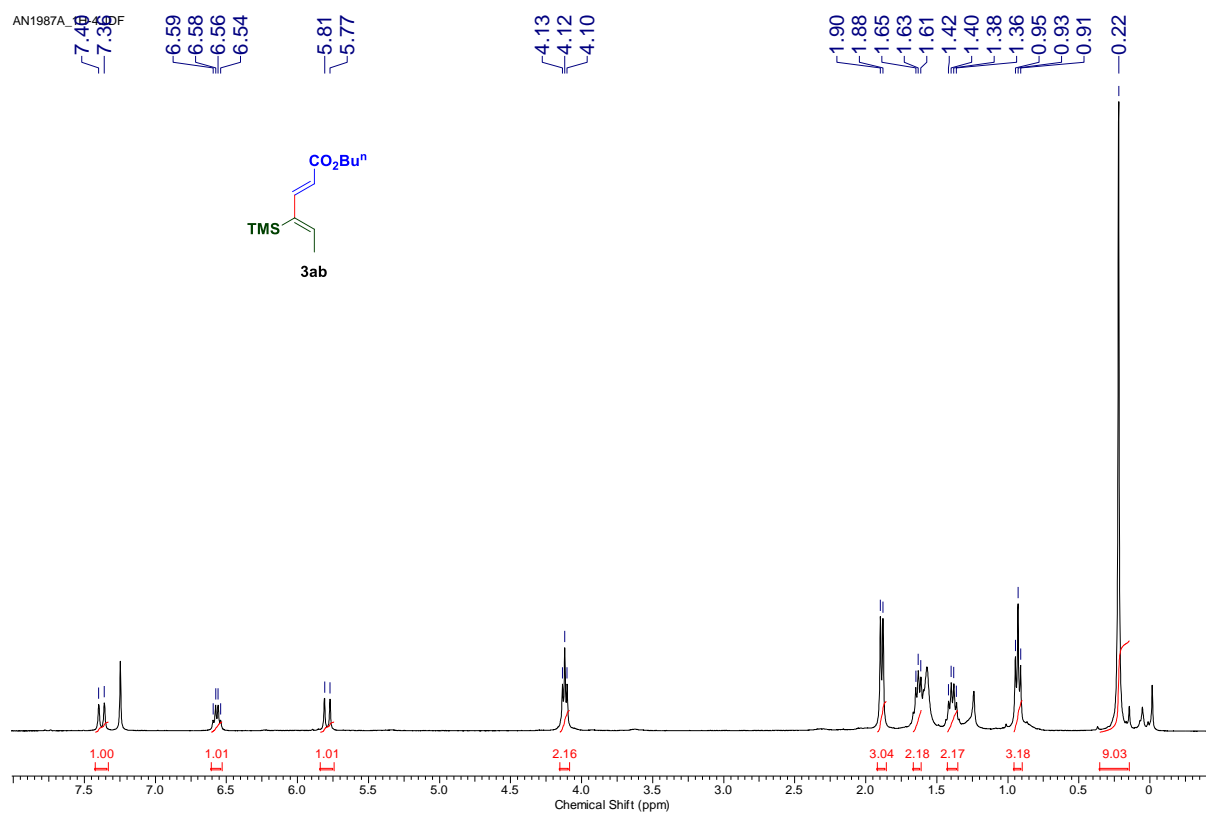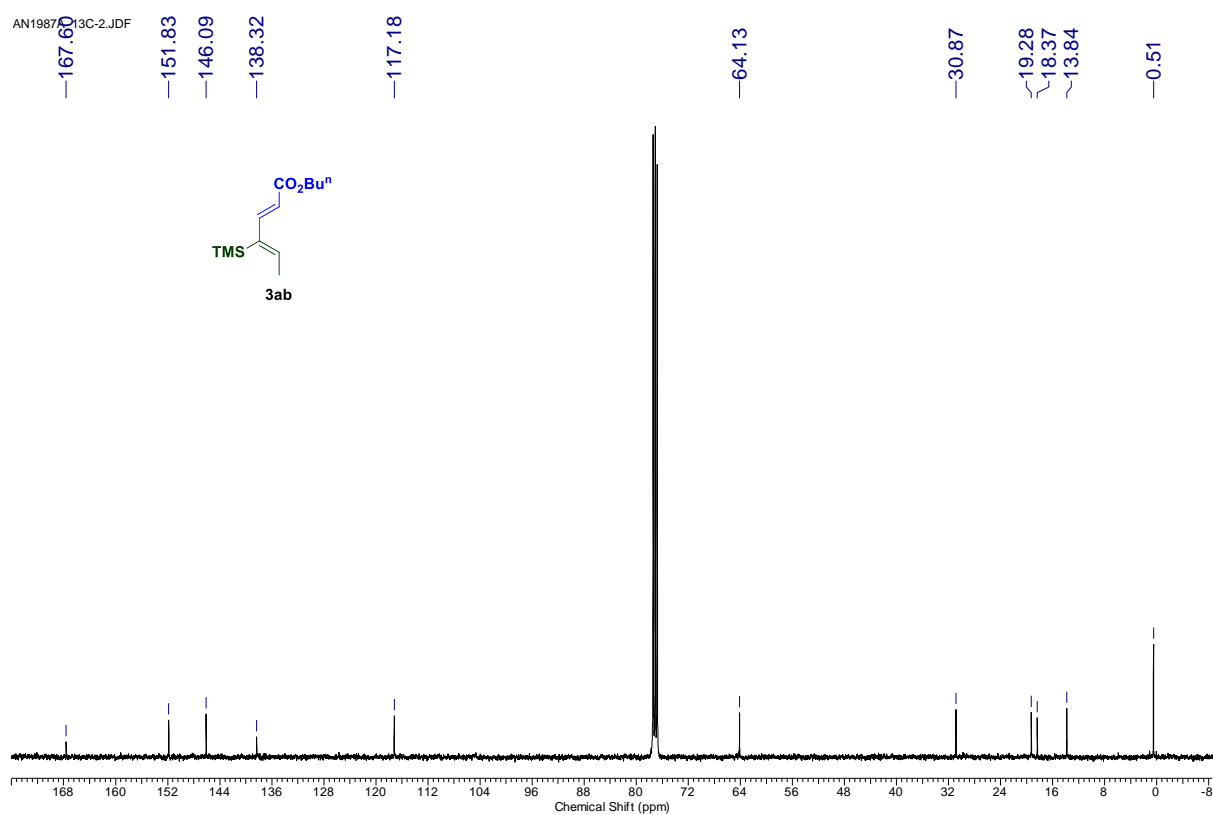

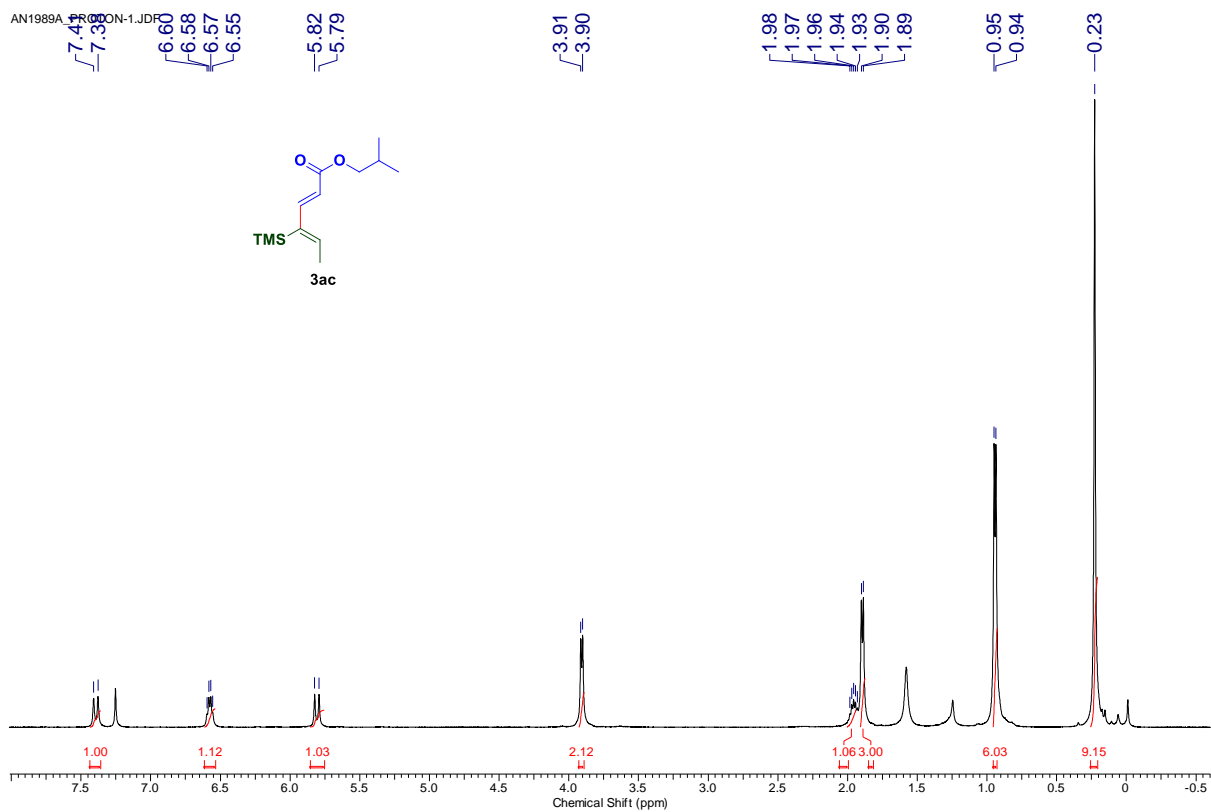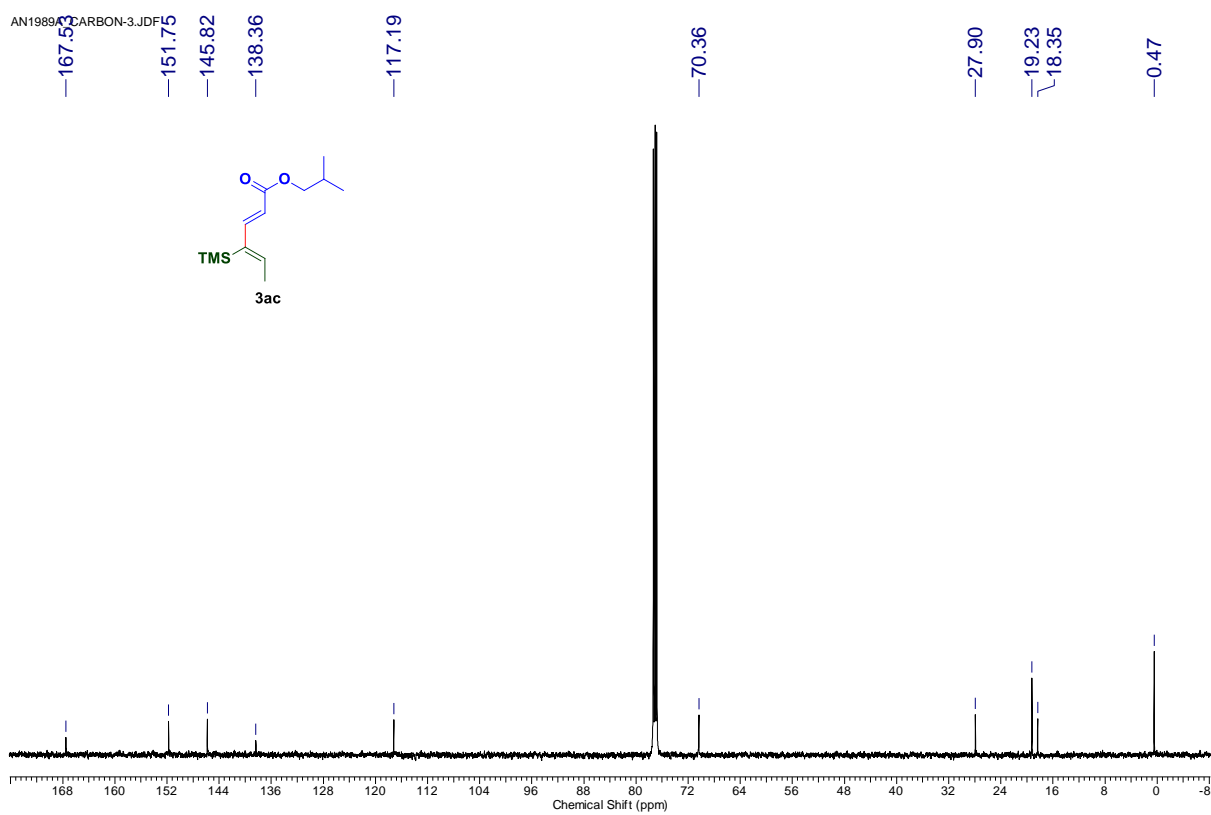

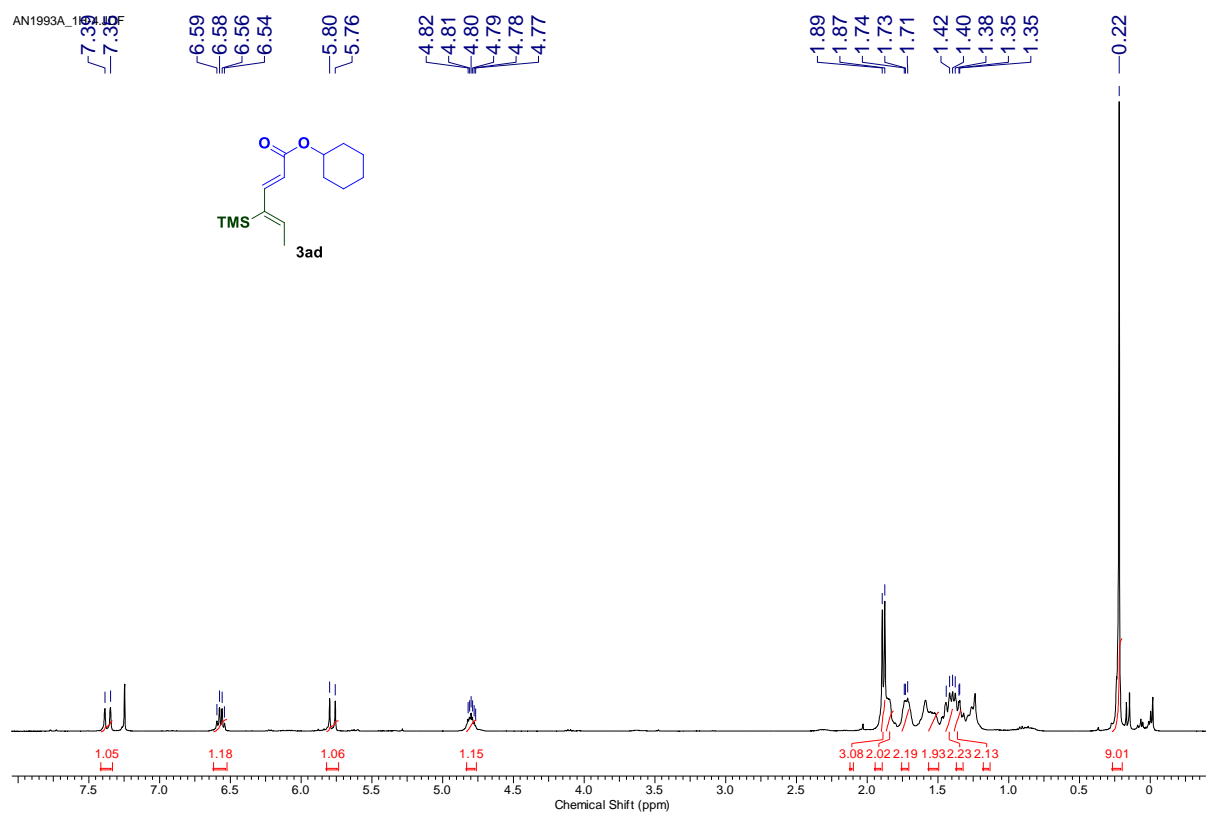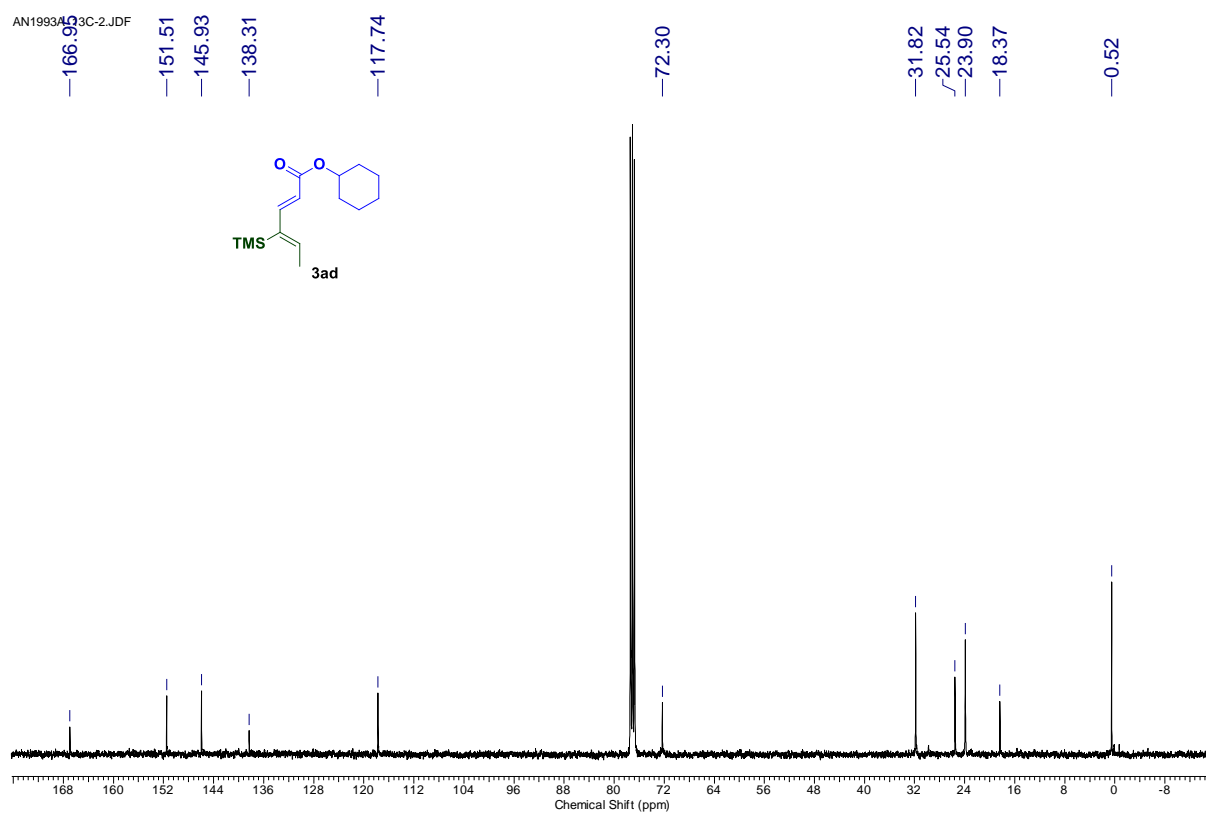

AN2066\_PRC102-4

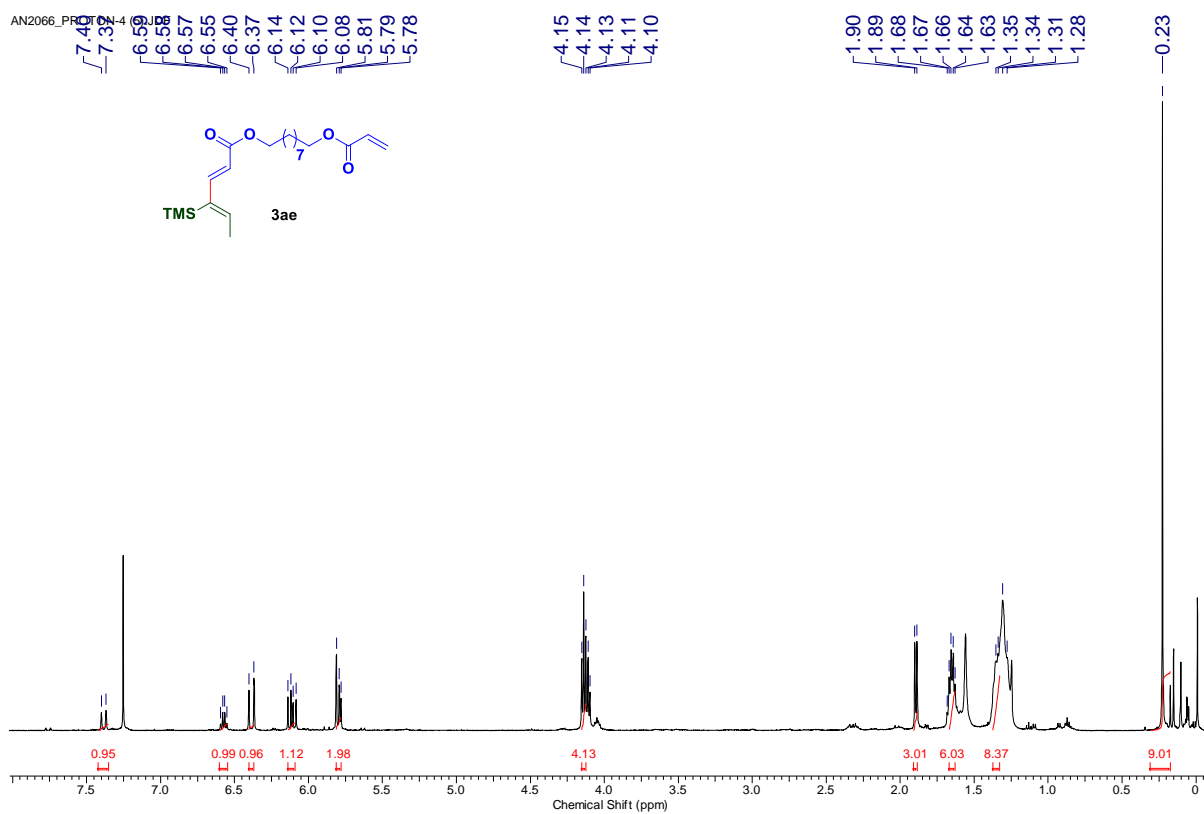

AN2066\_PRC102-4

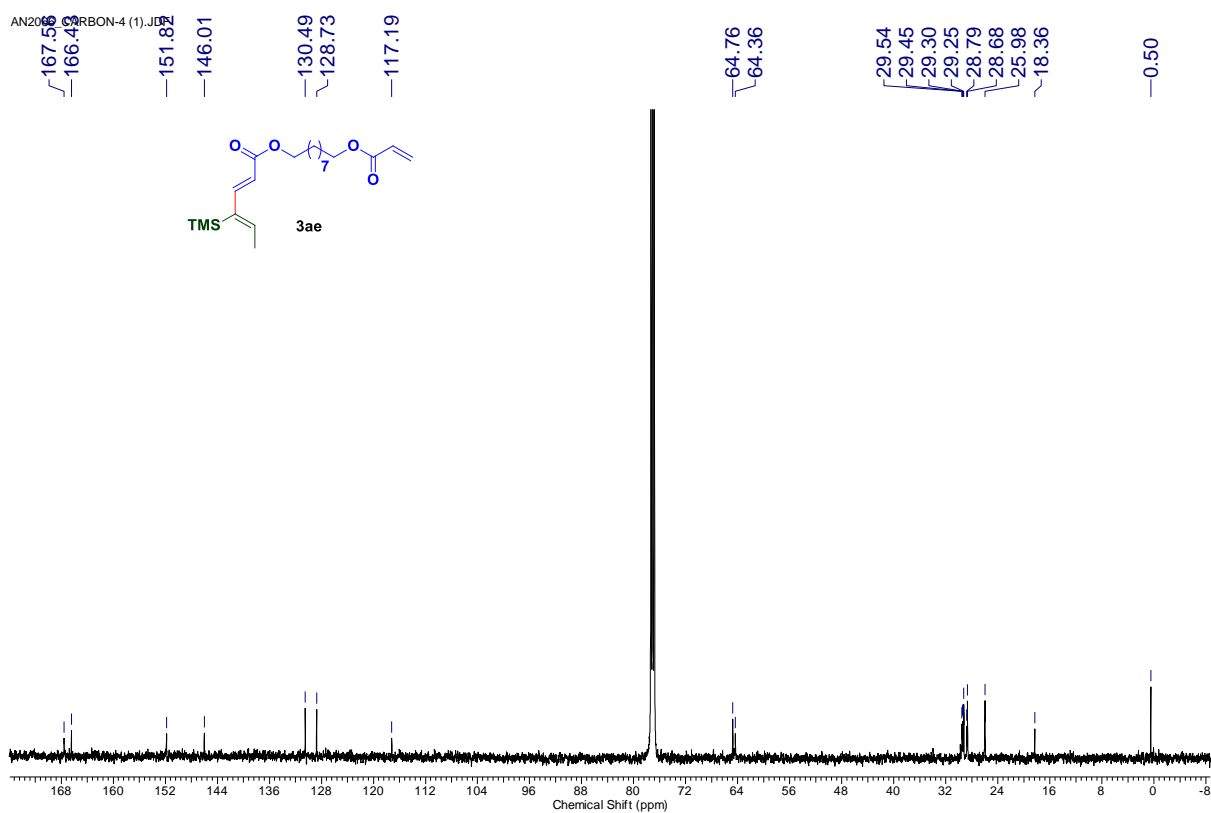



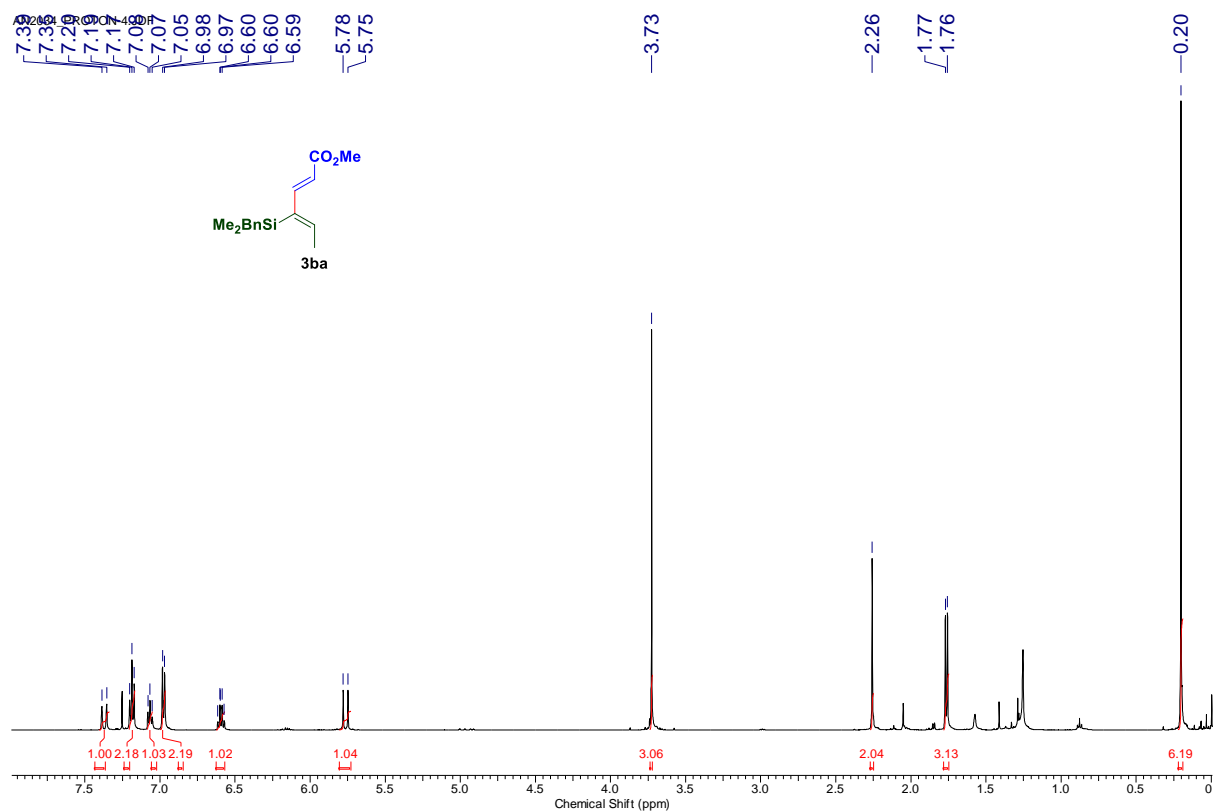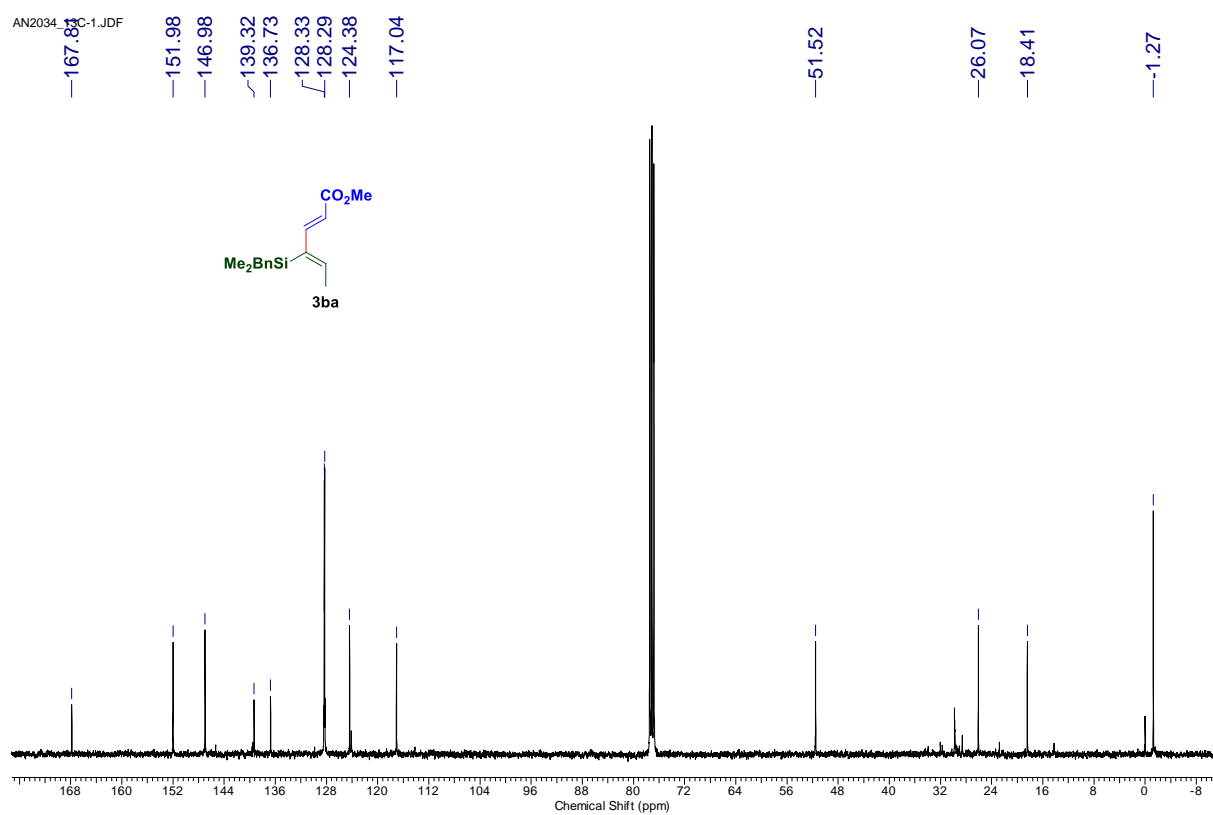





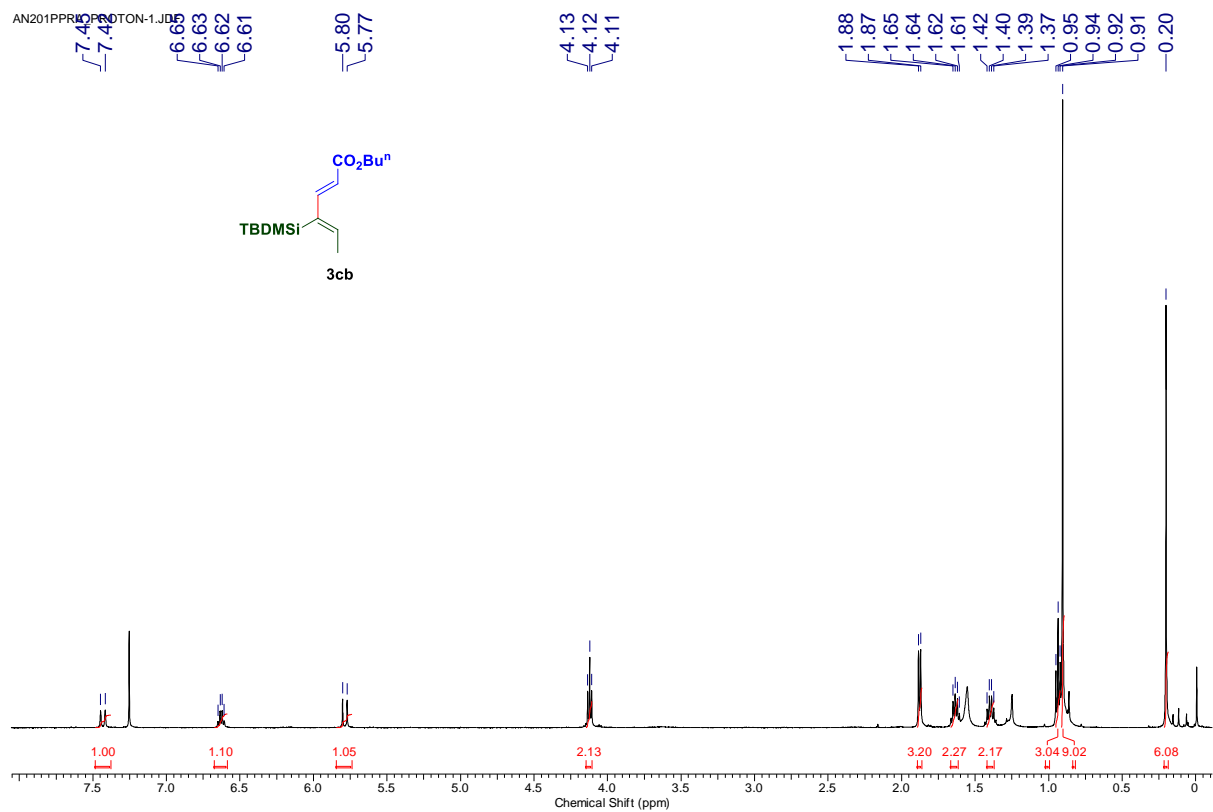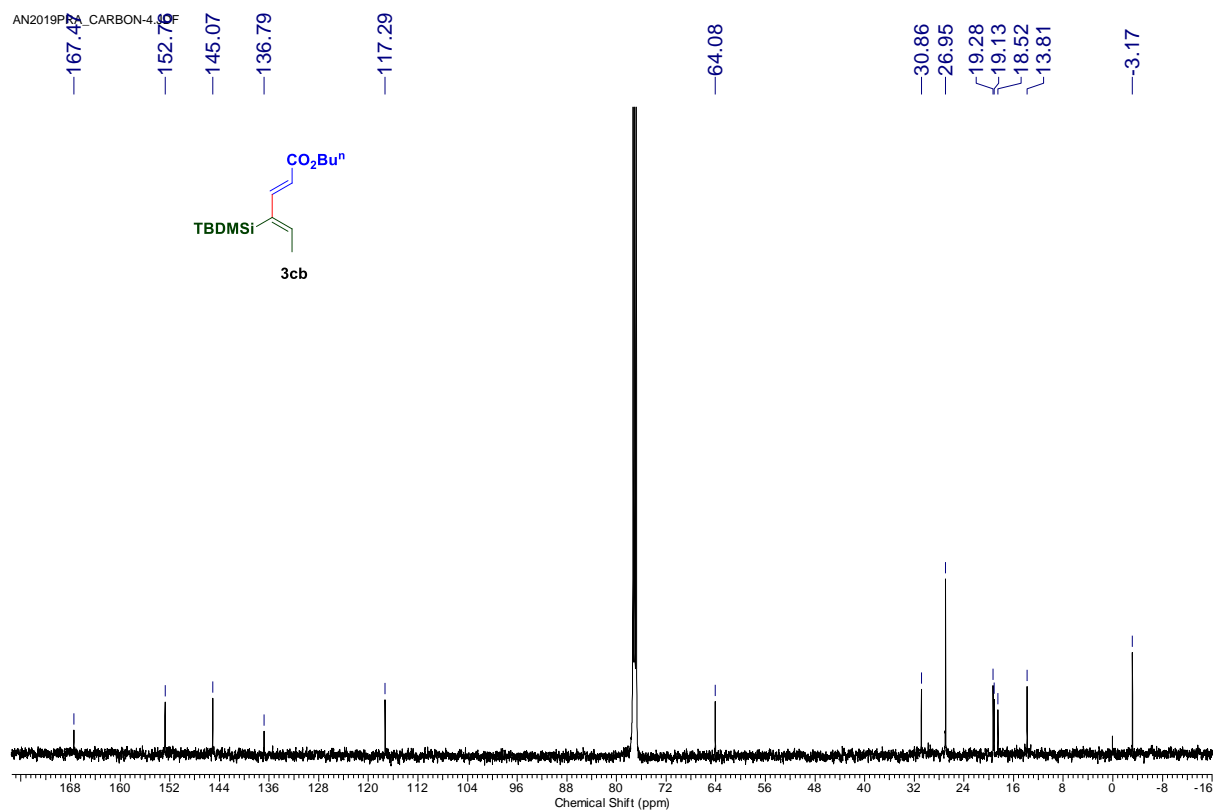

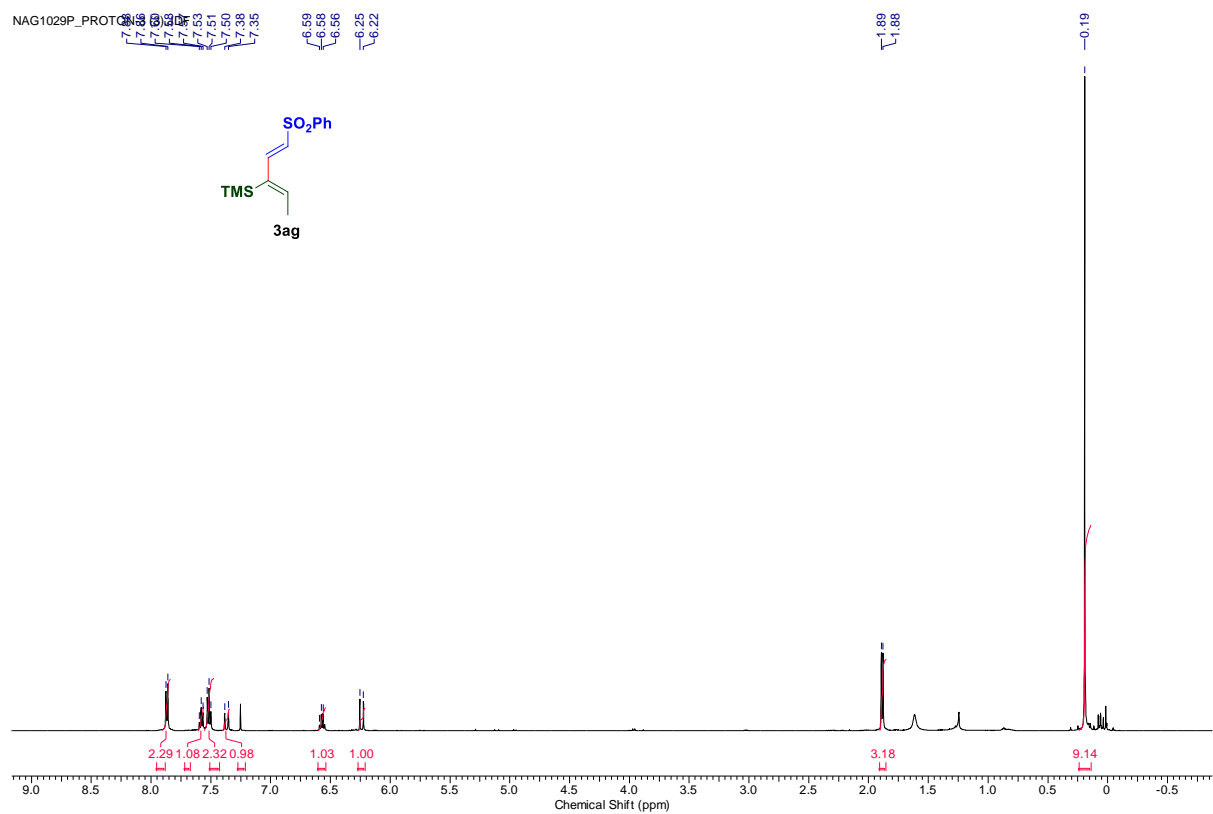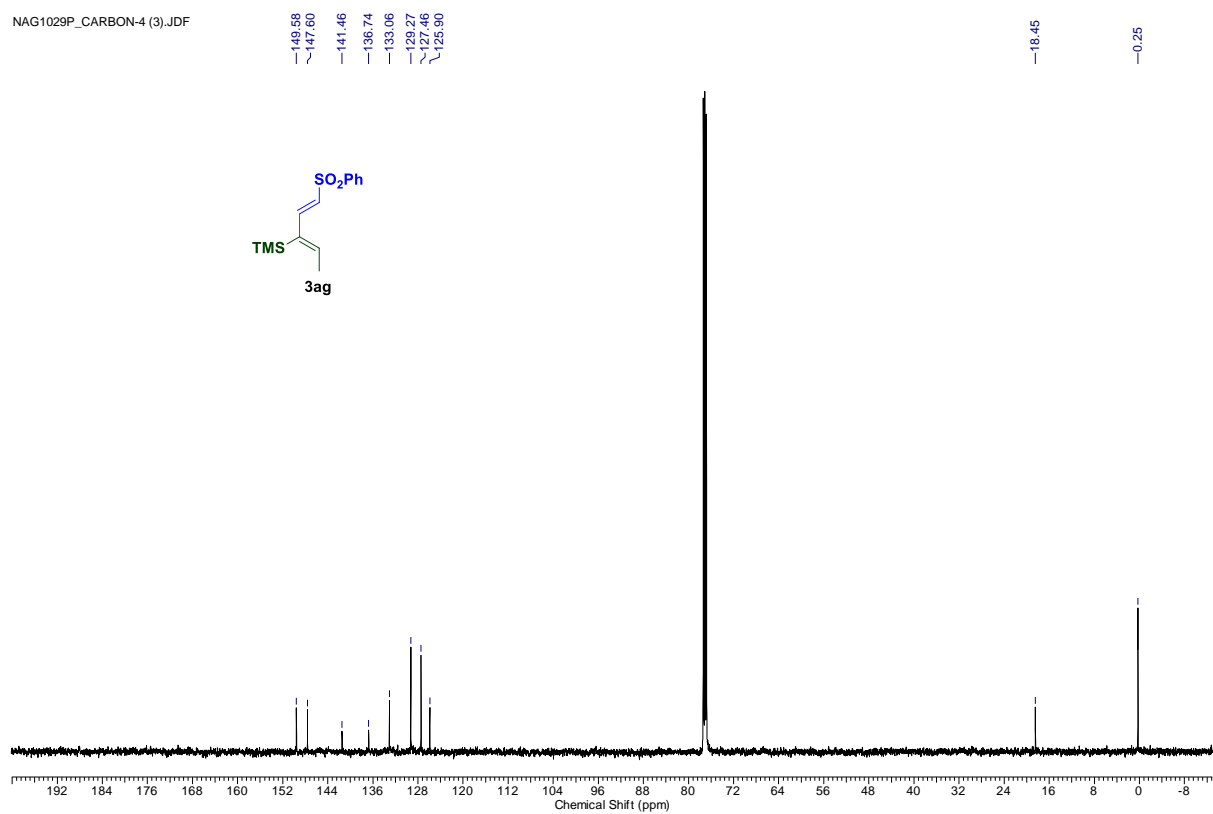

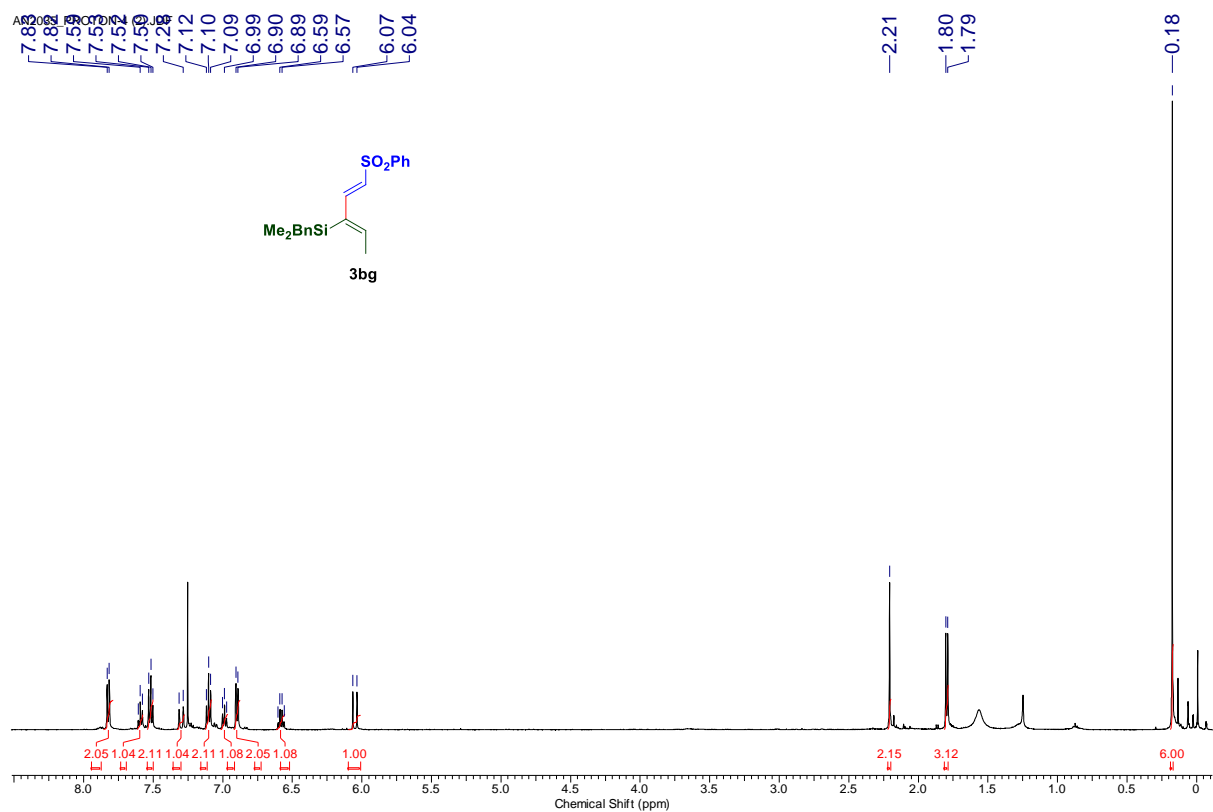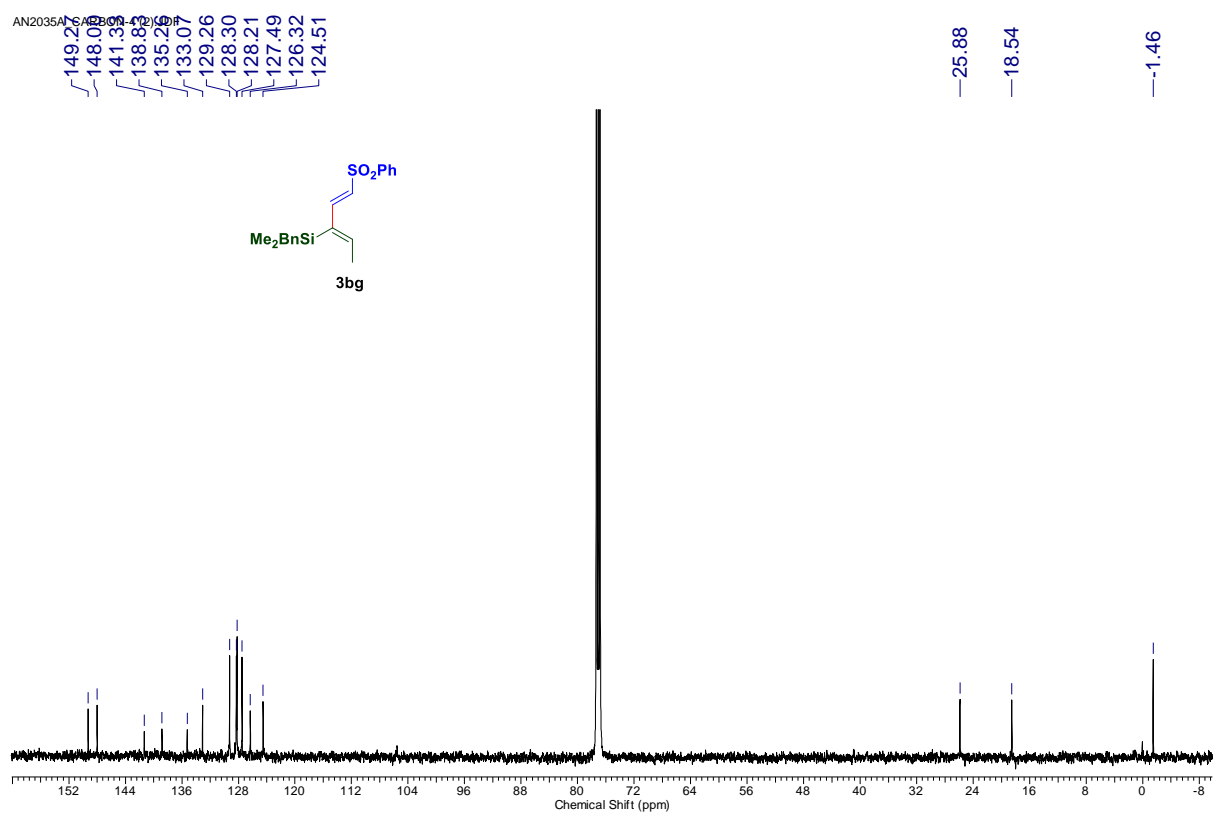

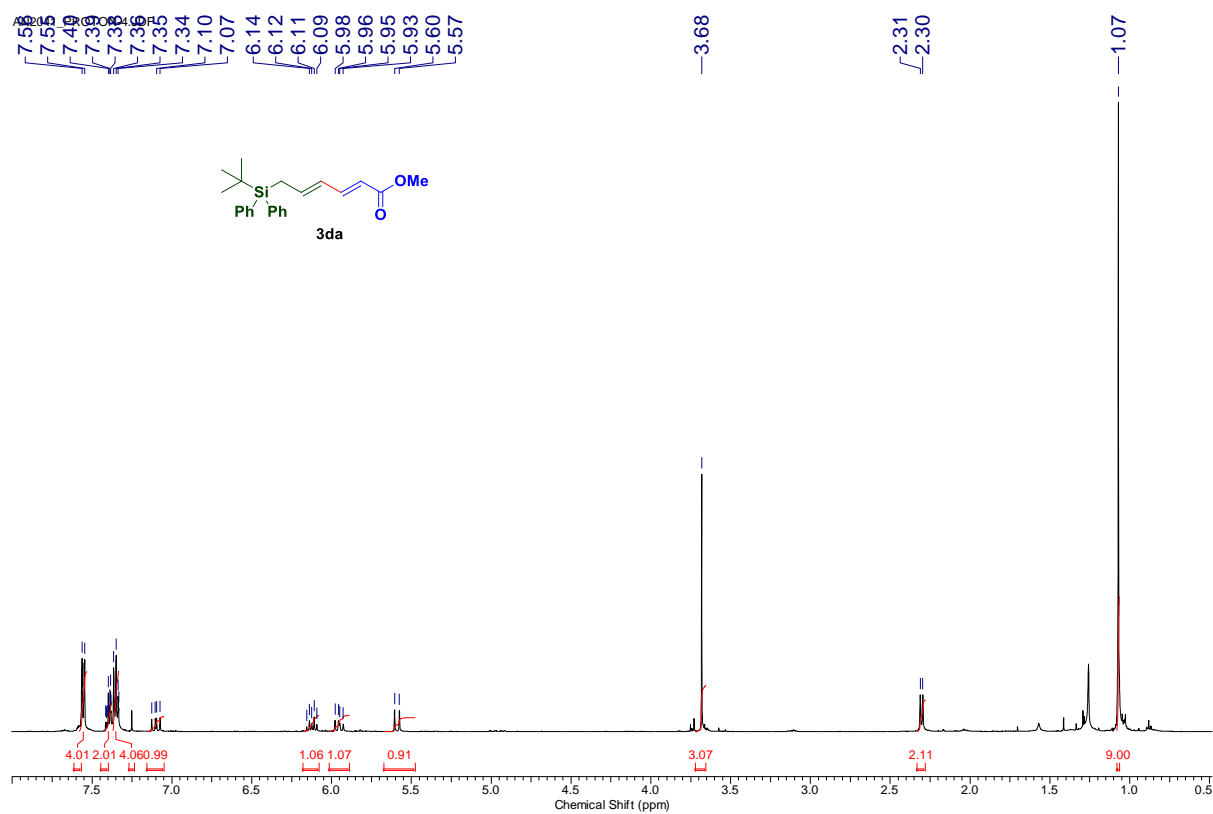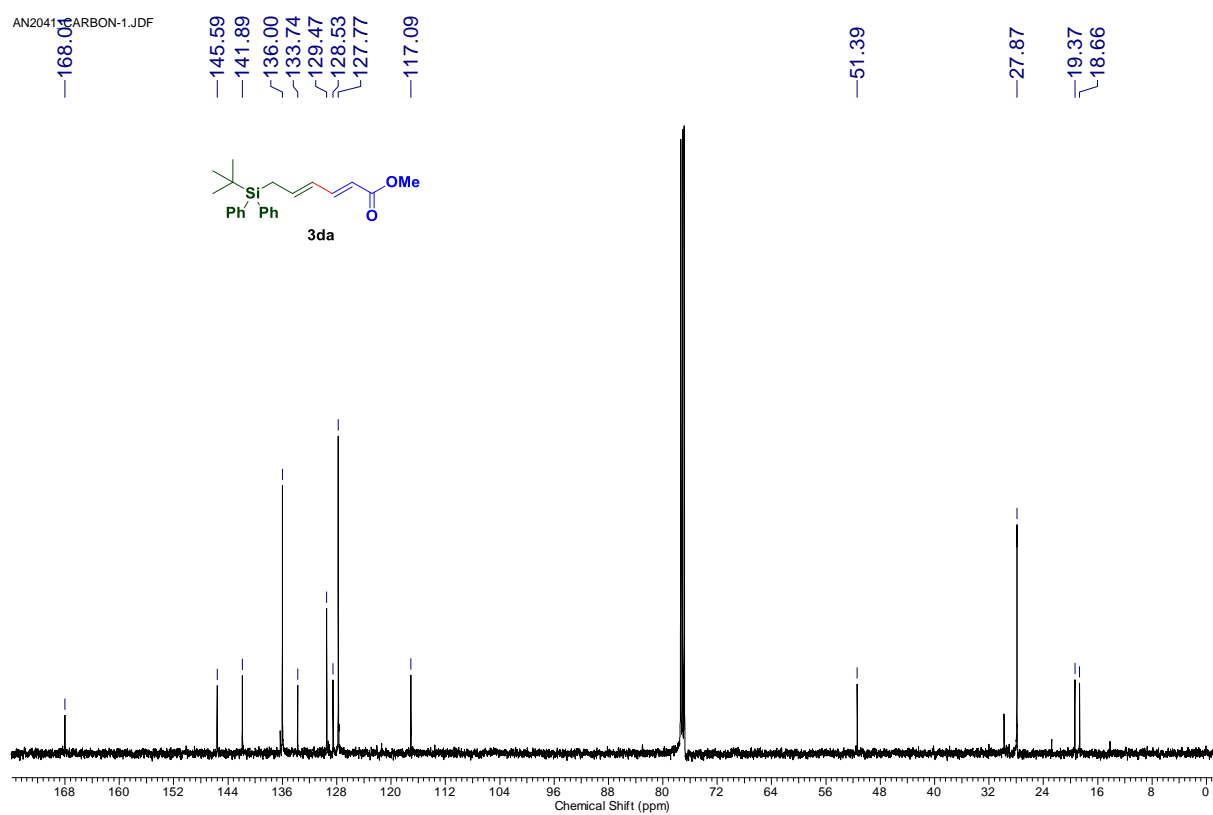

NAG418-1H-5.JDF

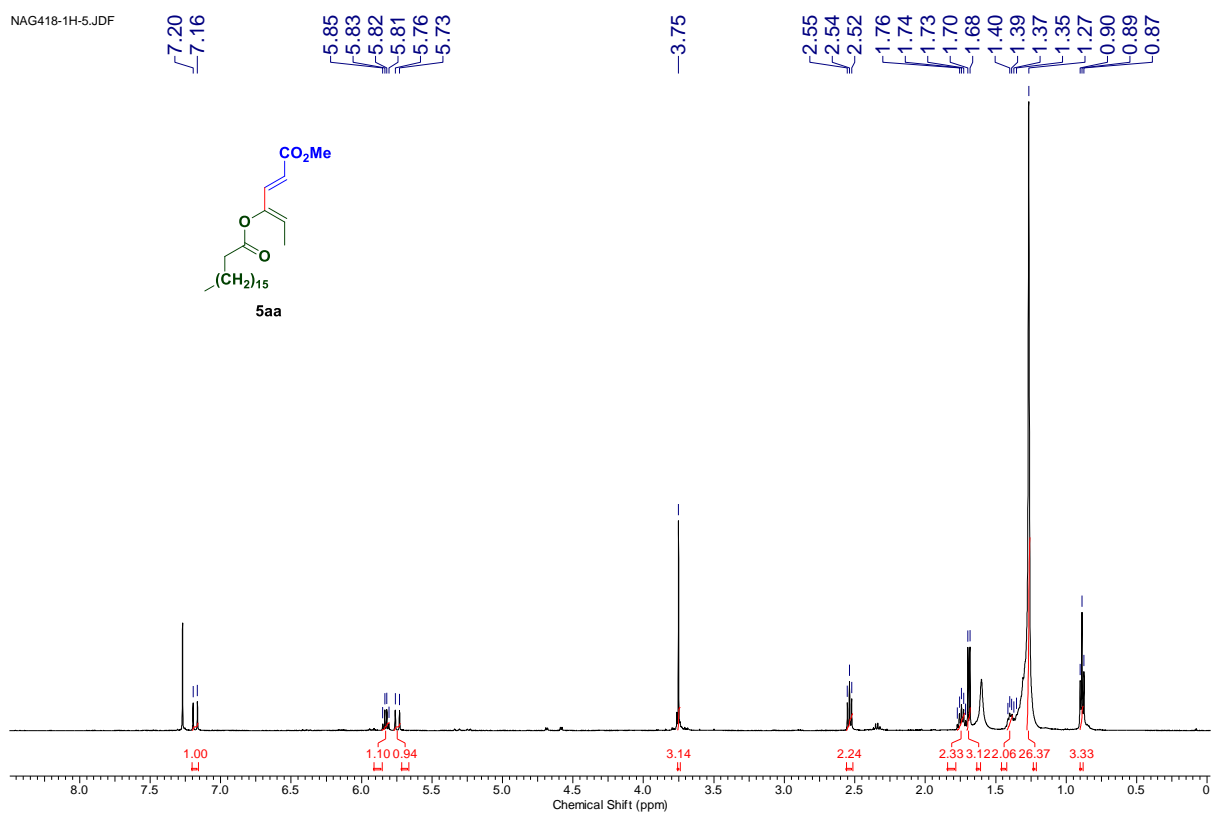

NAG418-13C-5.JDF

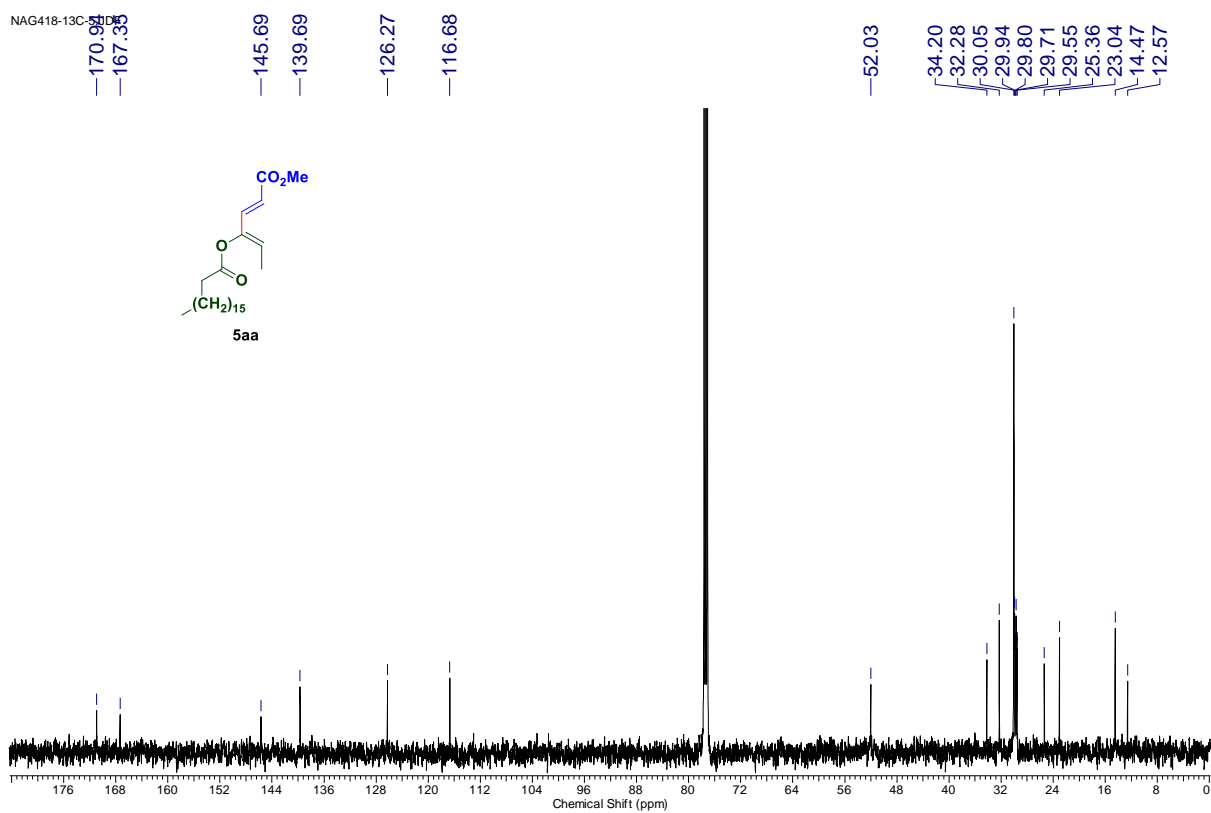

SKD1713-1H-6.JDF

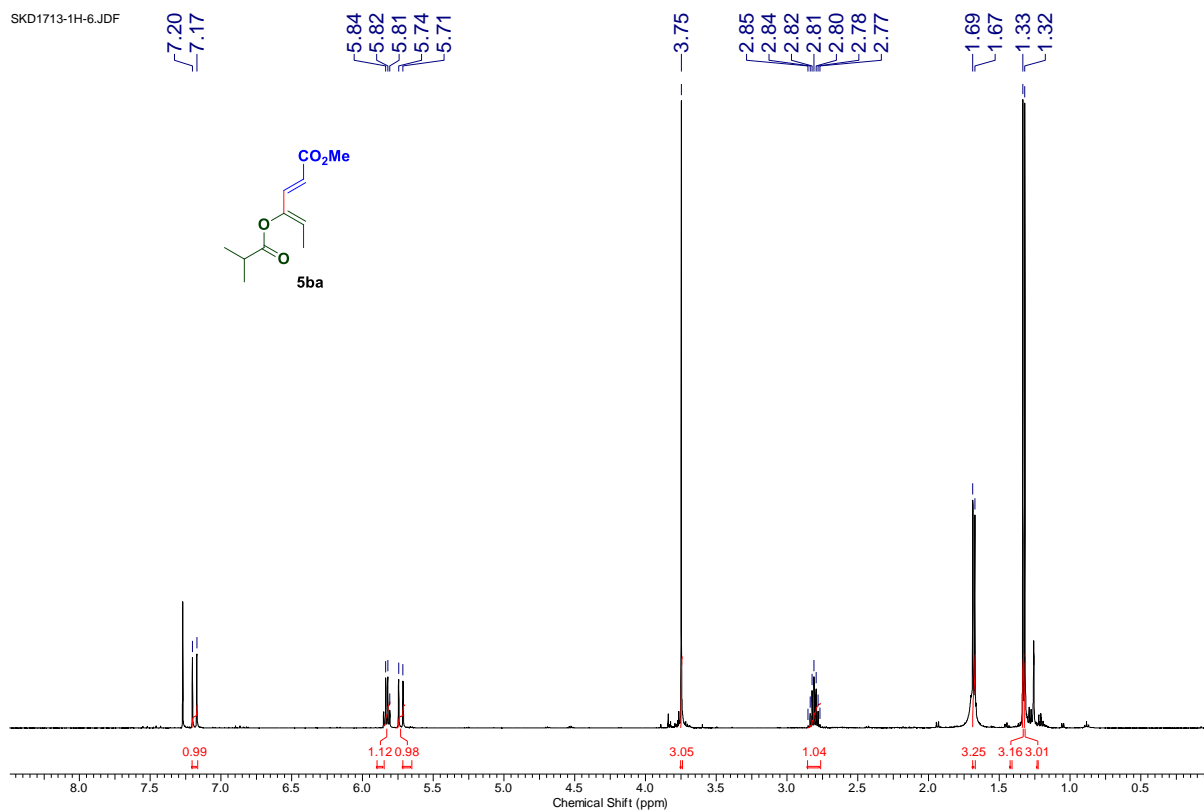

SKD1710-13C-6.JDF

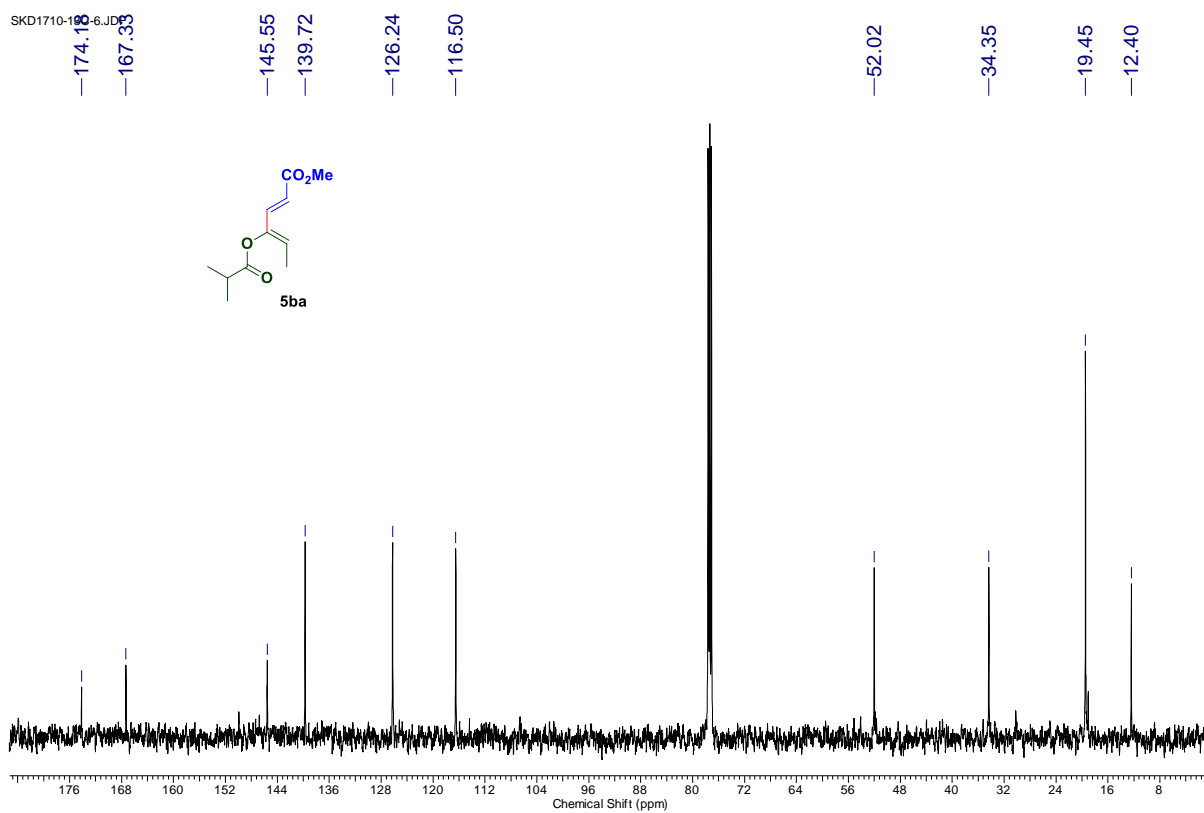

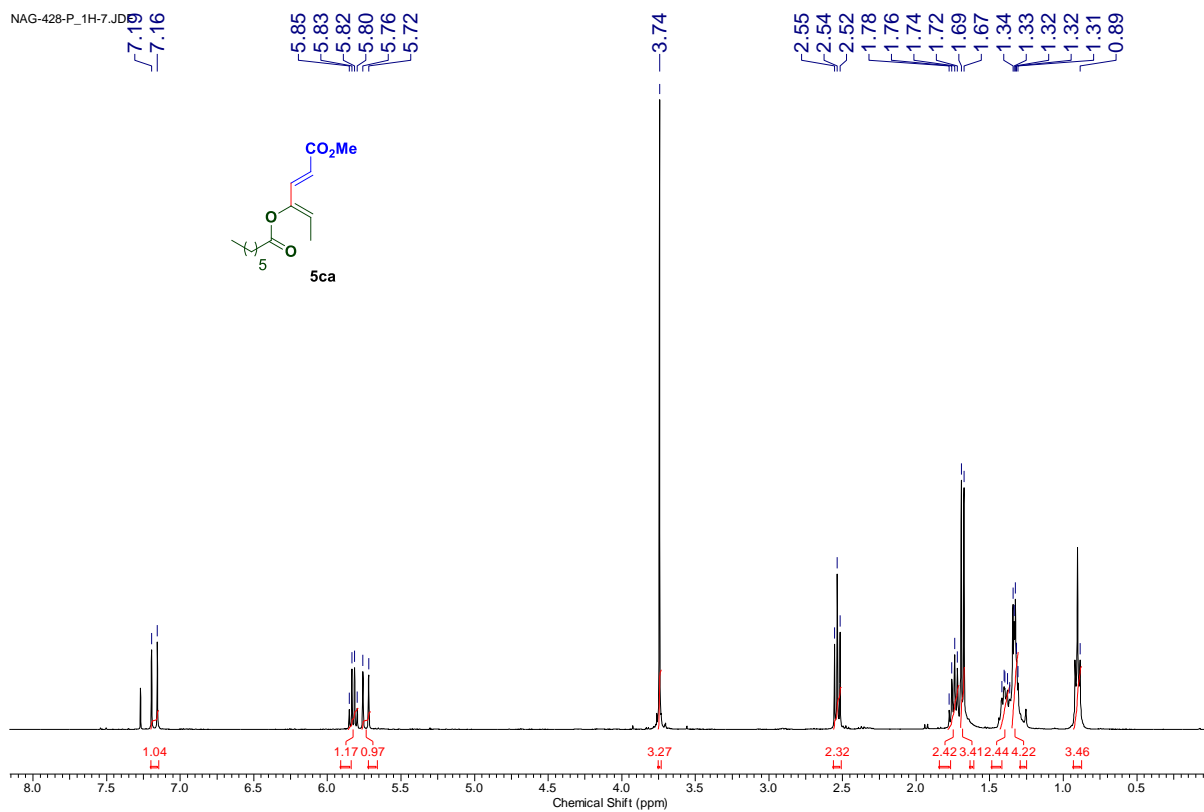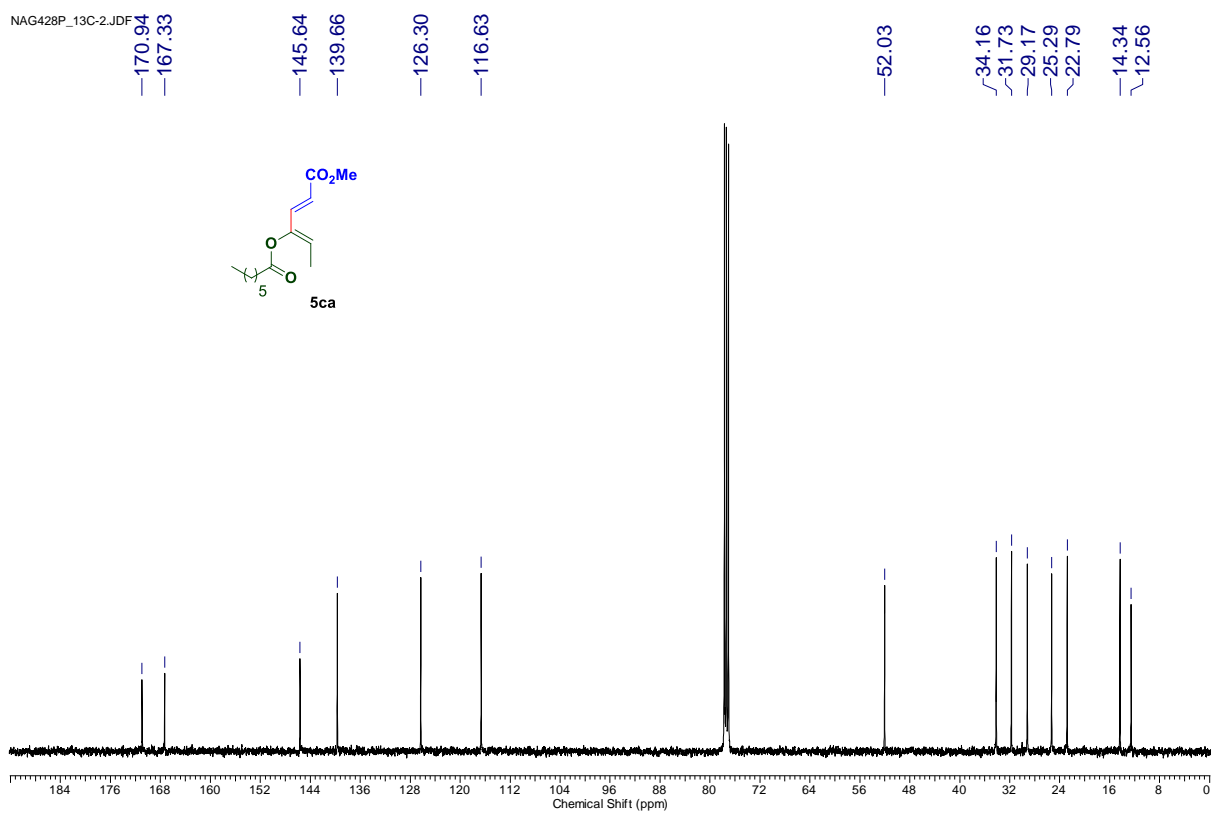

SKD1709-1H-5.JDF

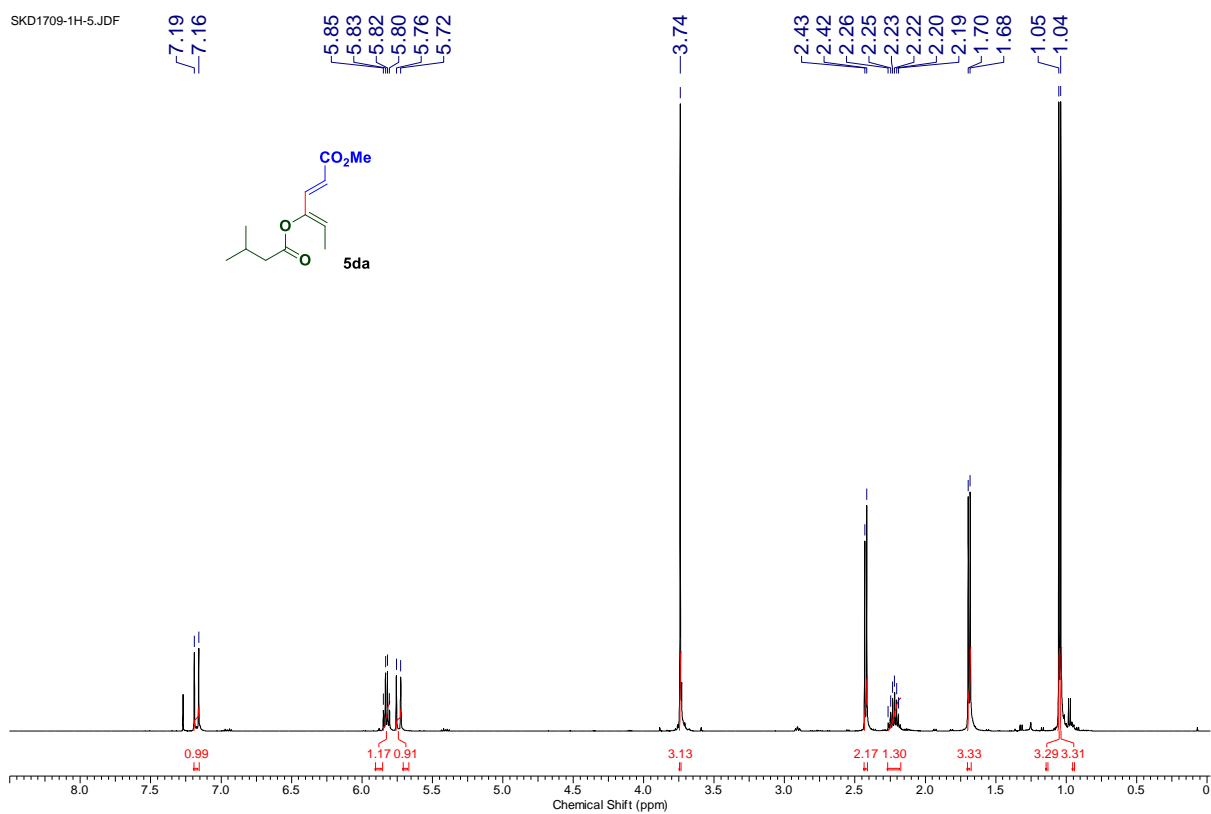

SKD1709-13C-4.JDF

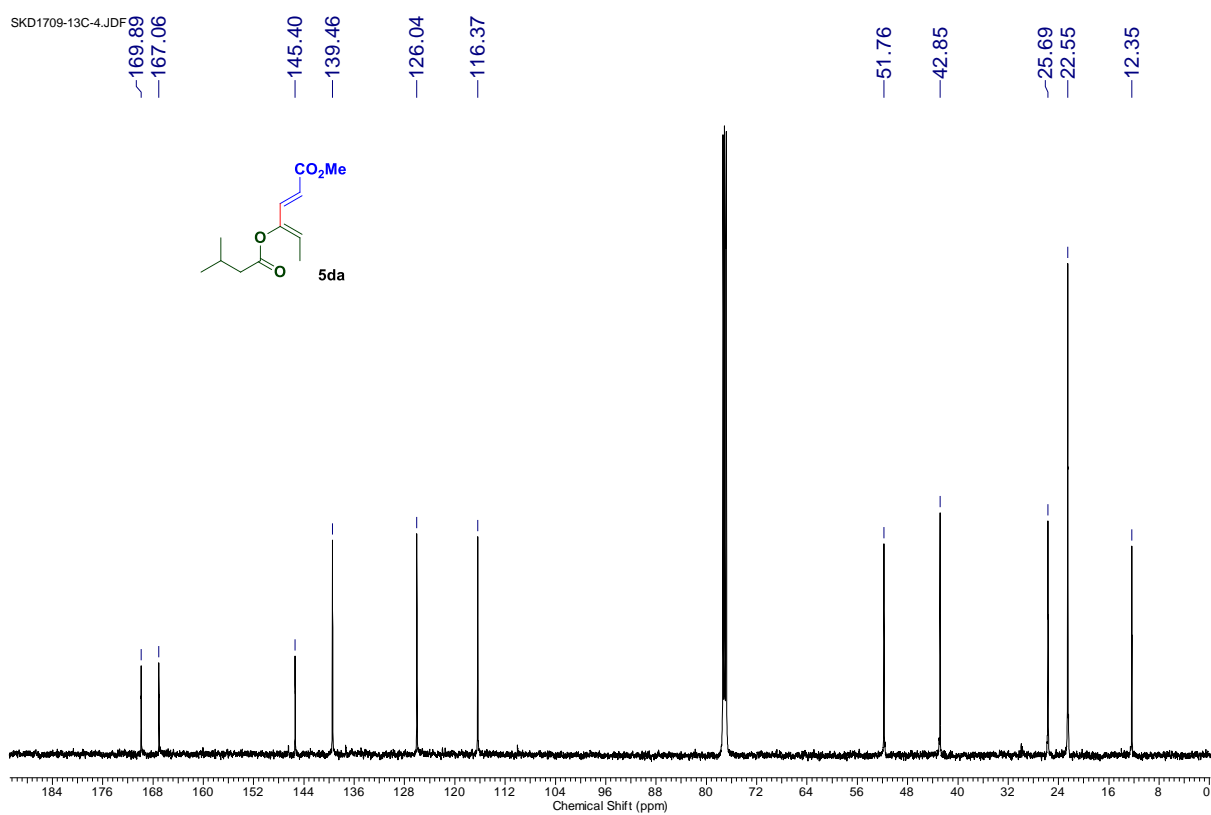

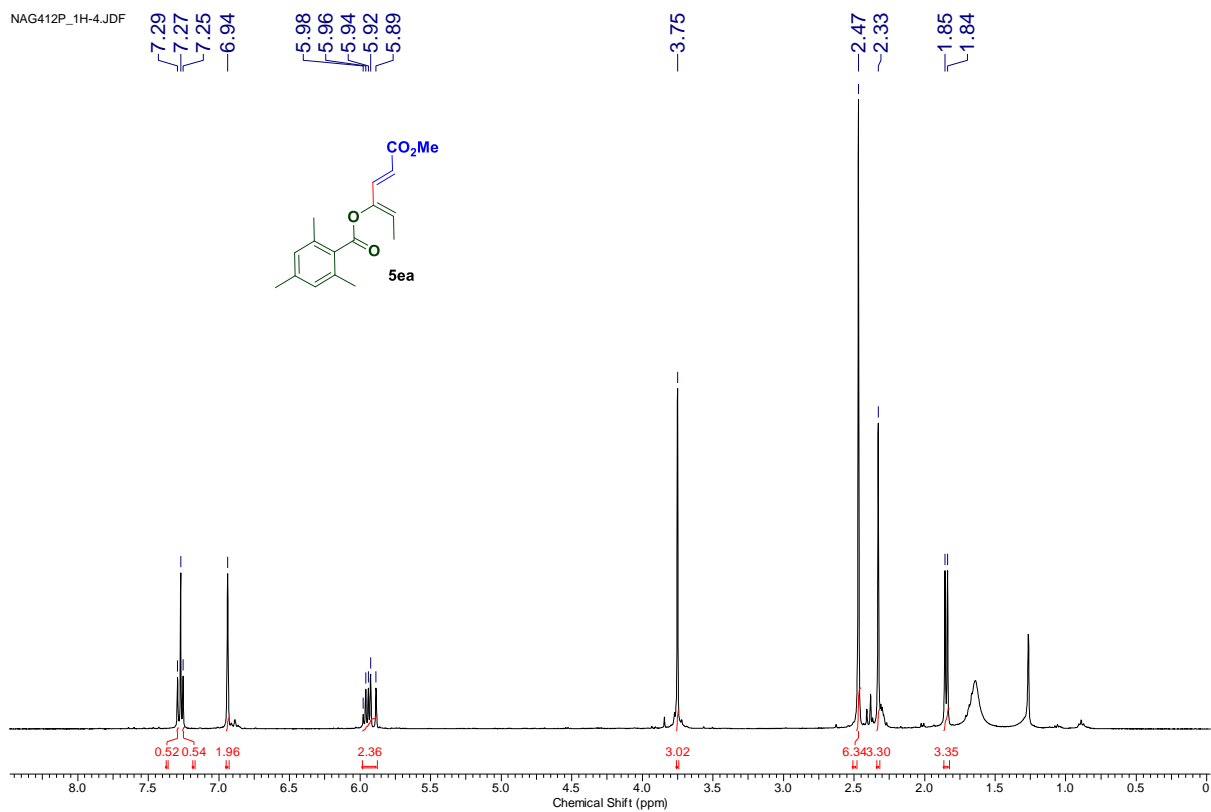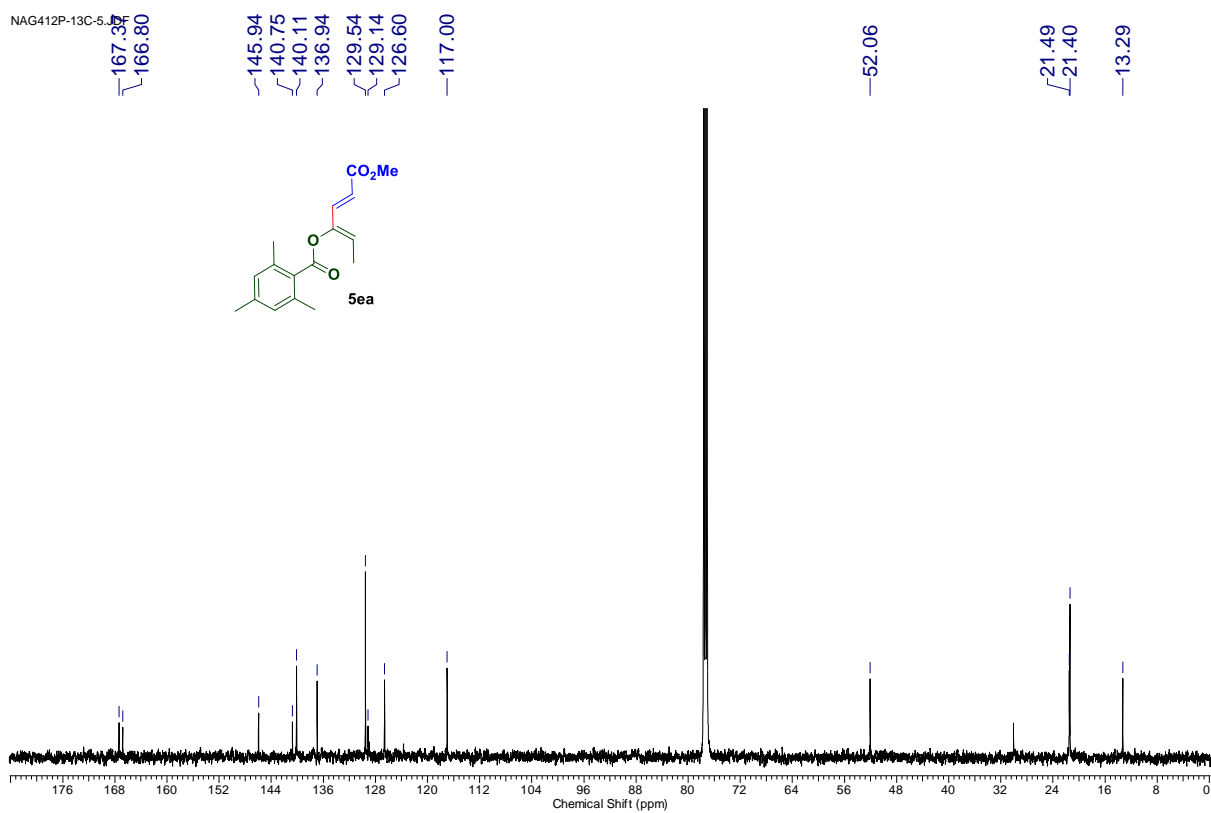

NAG-415\_1H-8.JDF

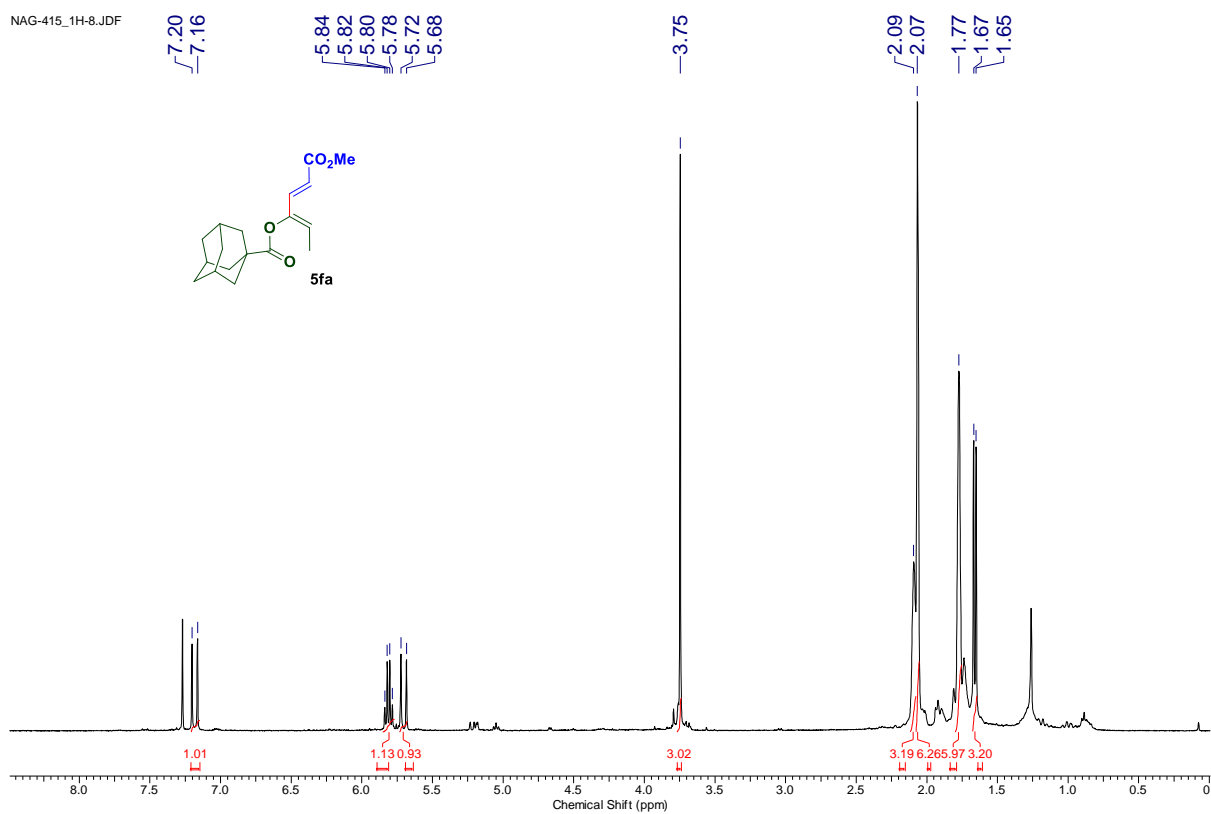

NAG415\_13C-3.JDF

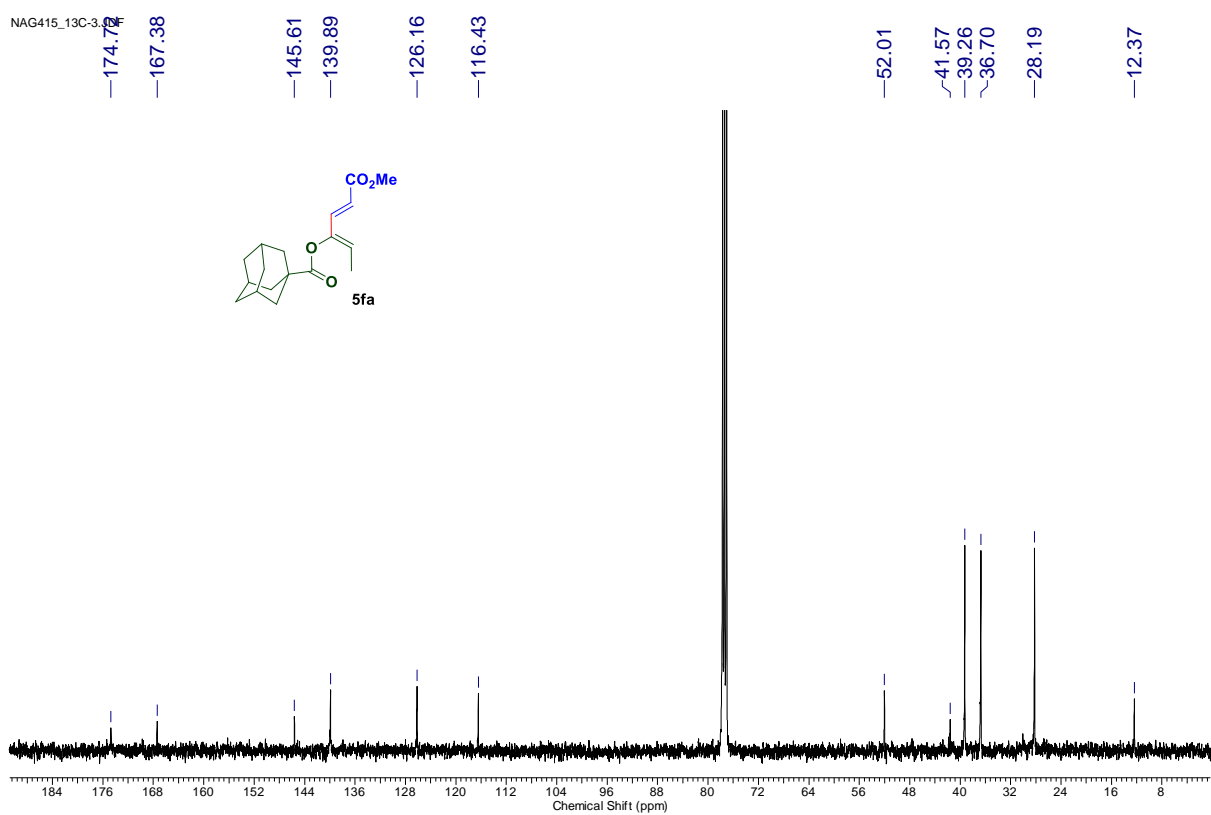

SKD1614R-1H-5.JDF

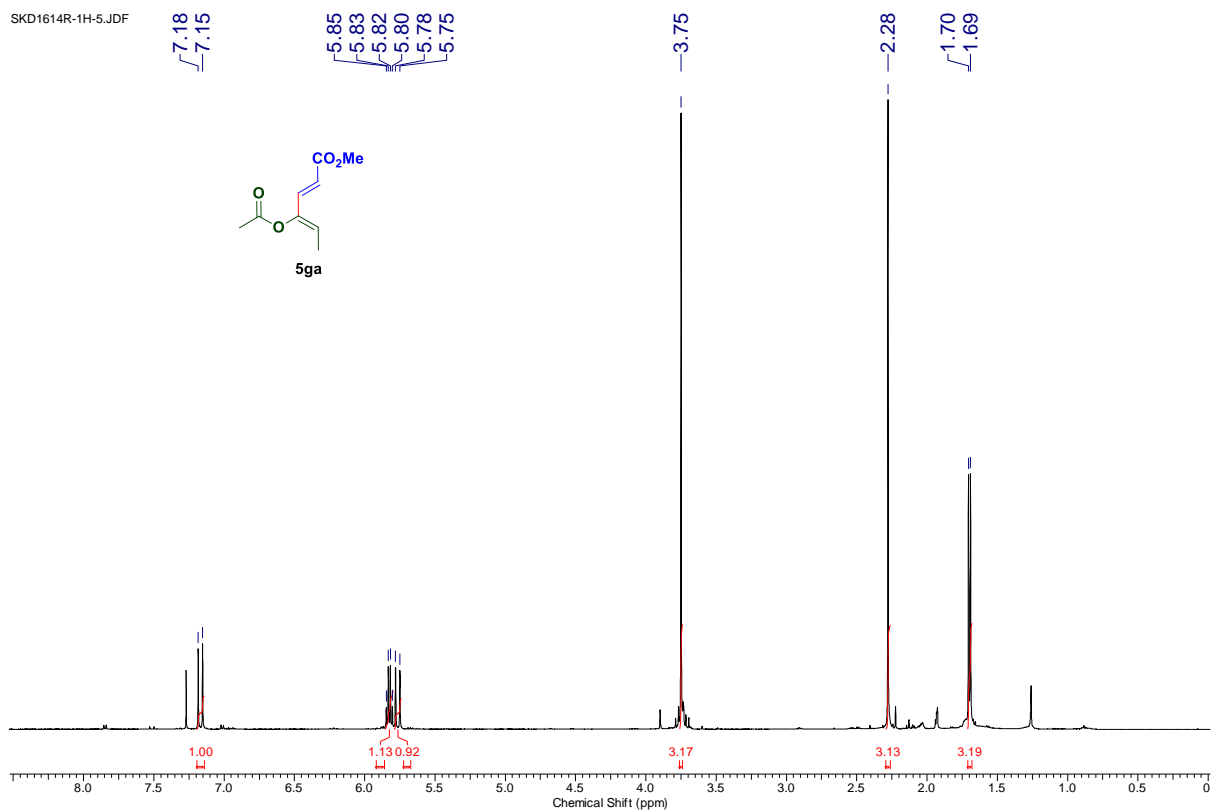

SKD1614R-13C-11.JDF

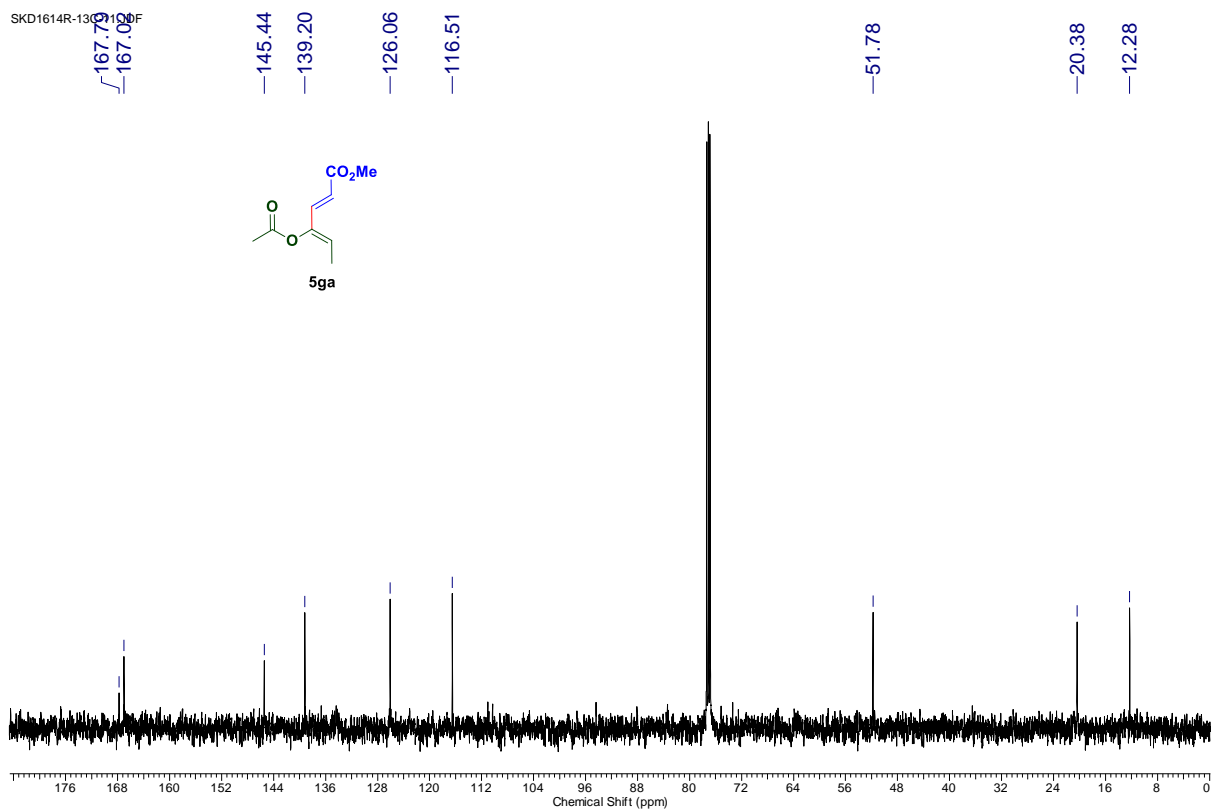

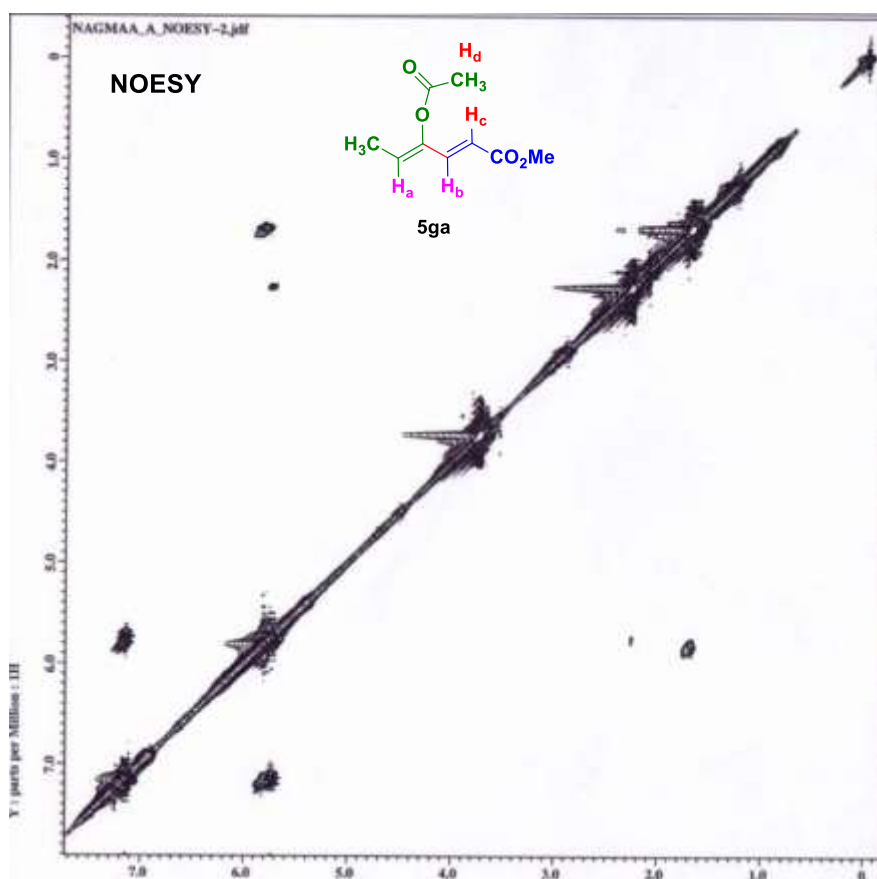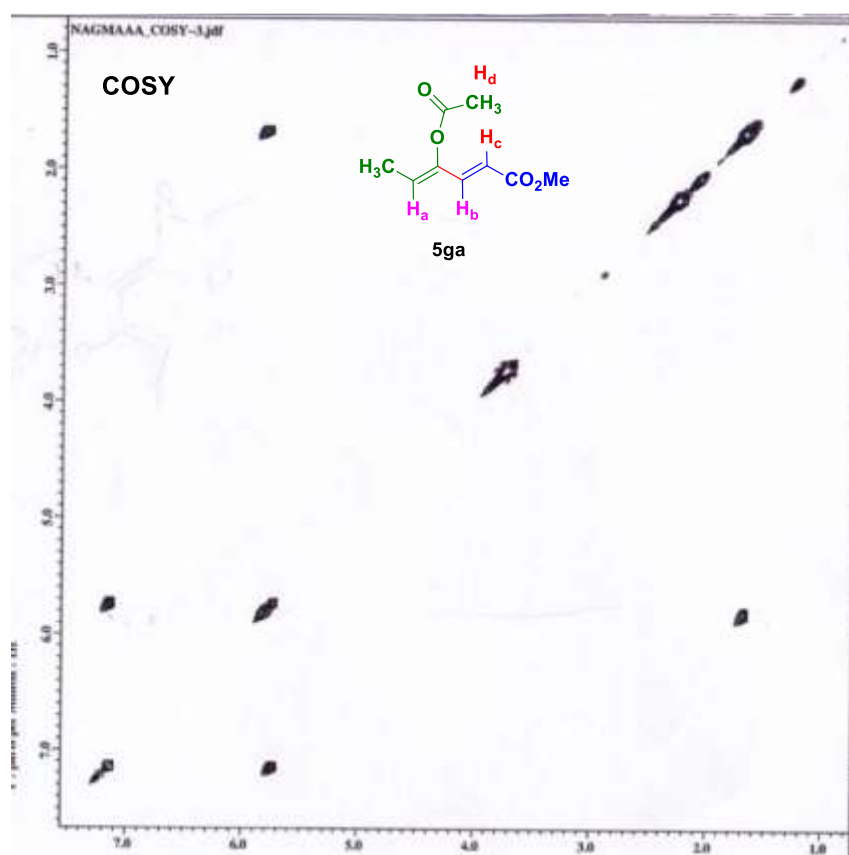

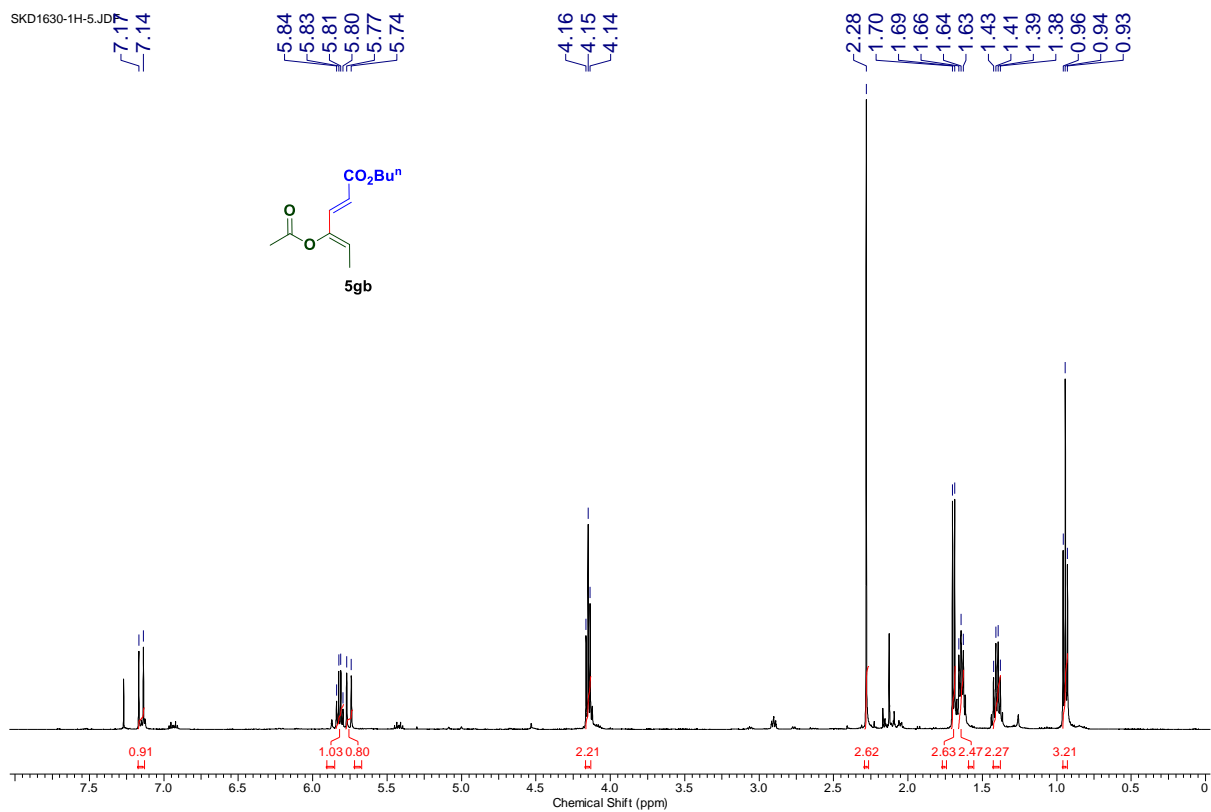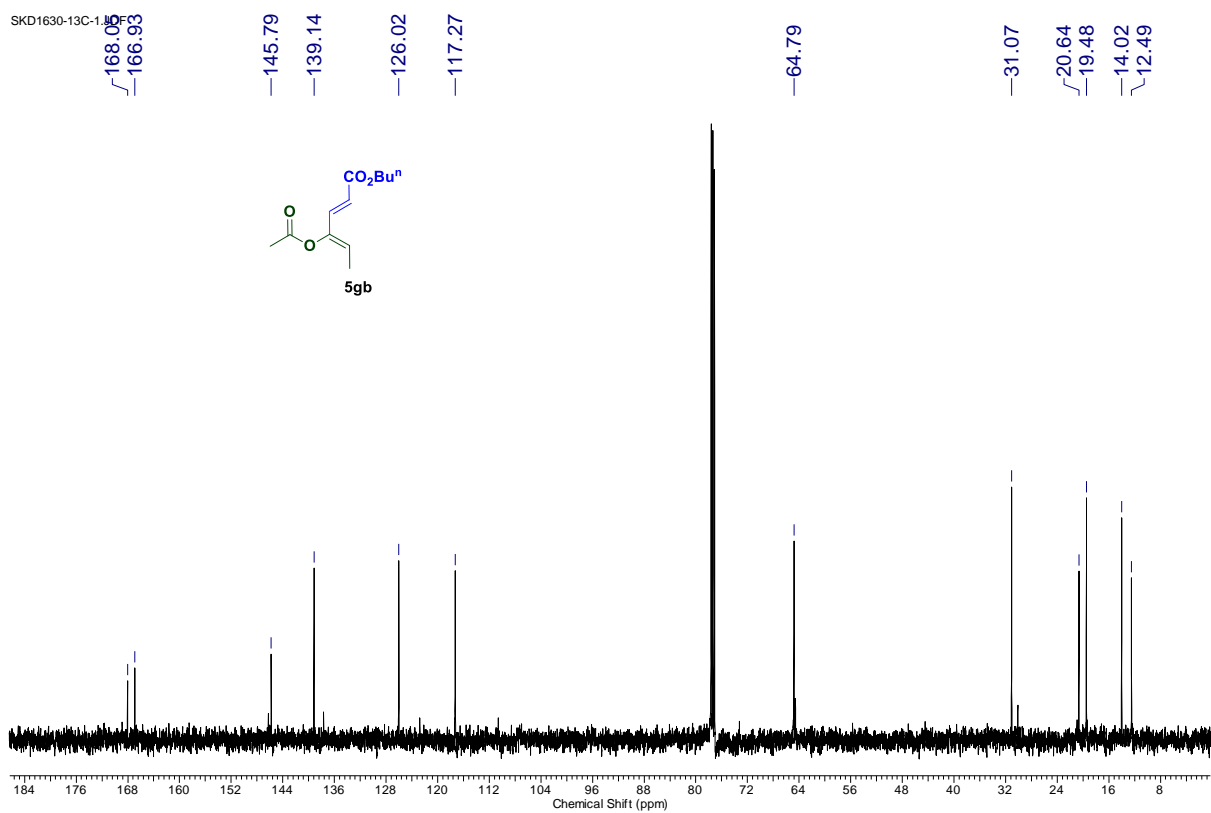

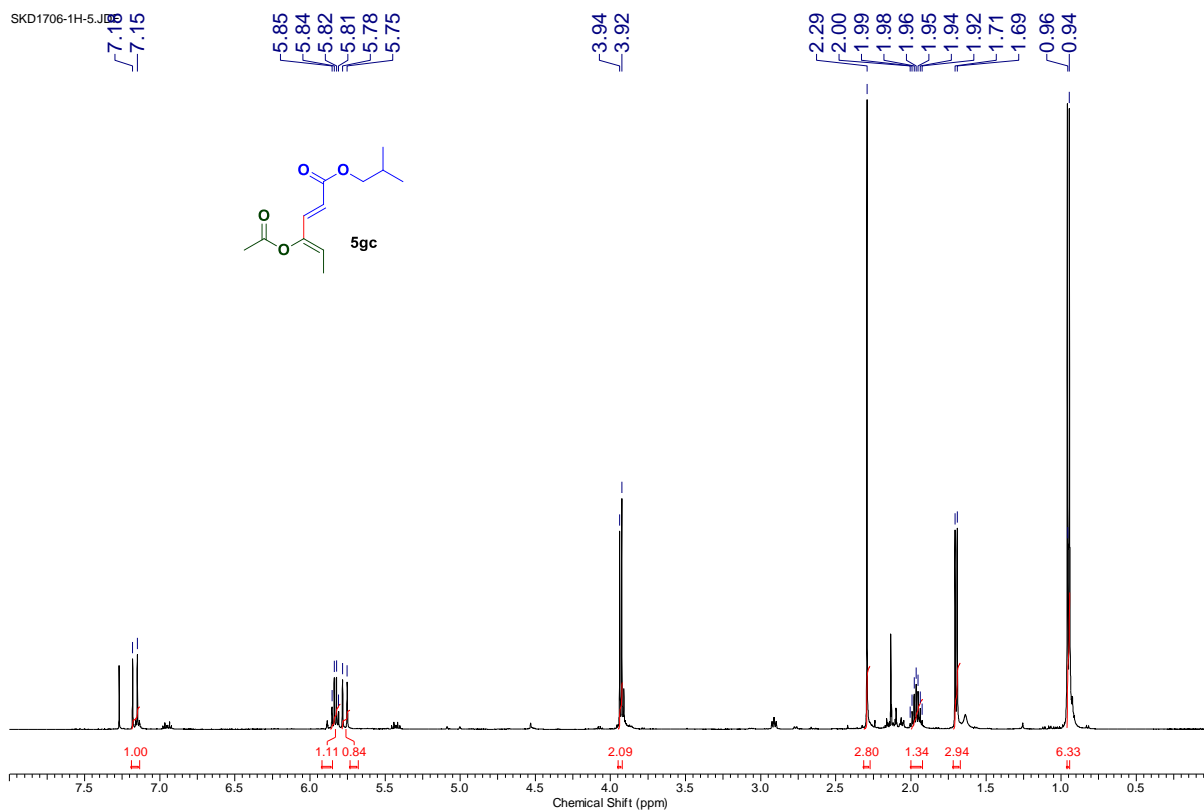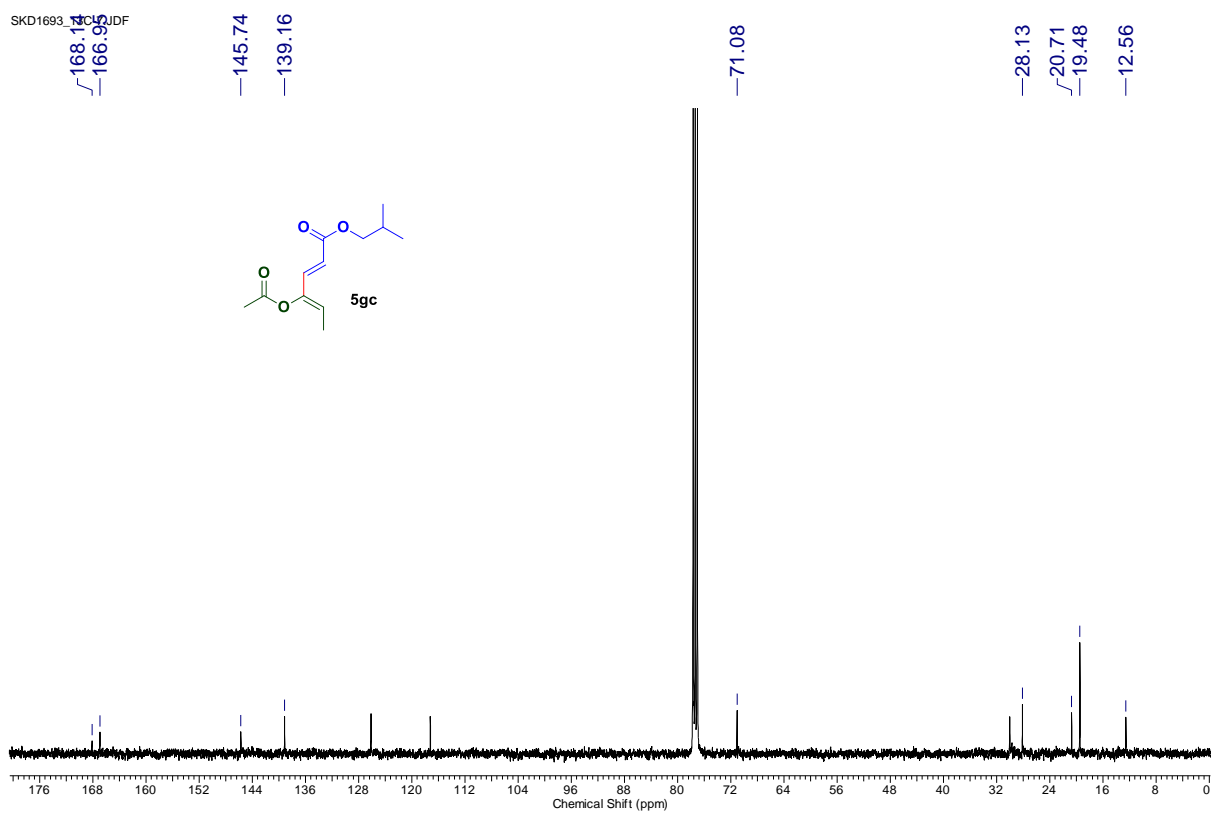

SKD1707-1H-5J105

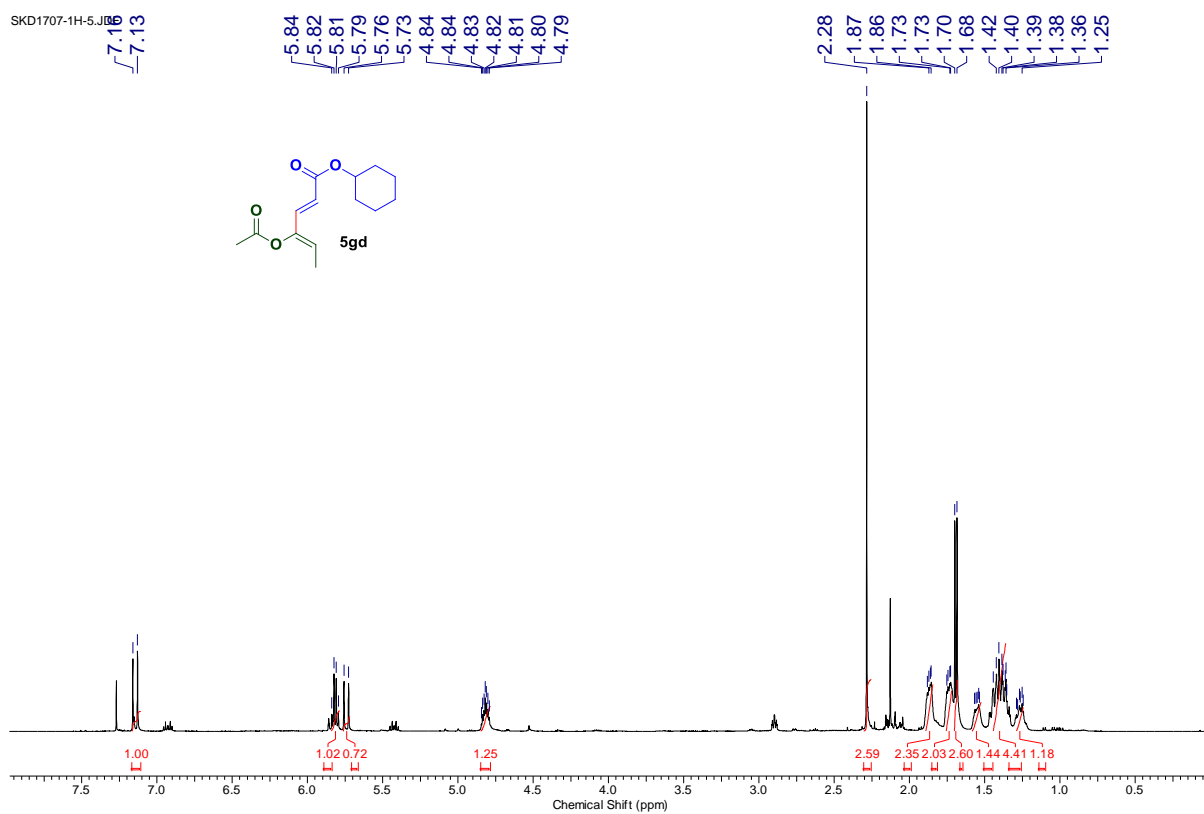

SKD1692\_13C-6J105

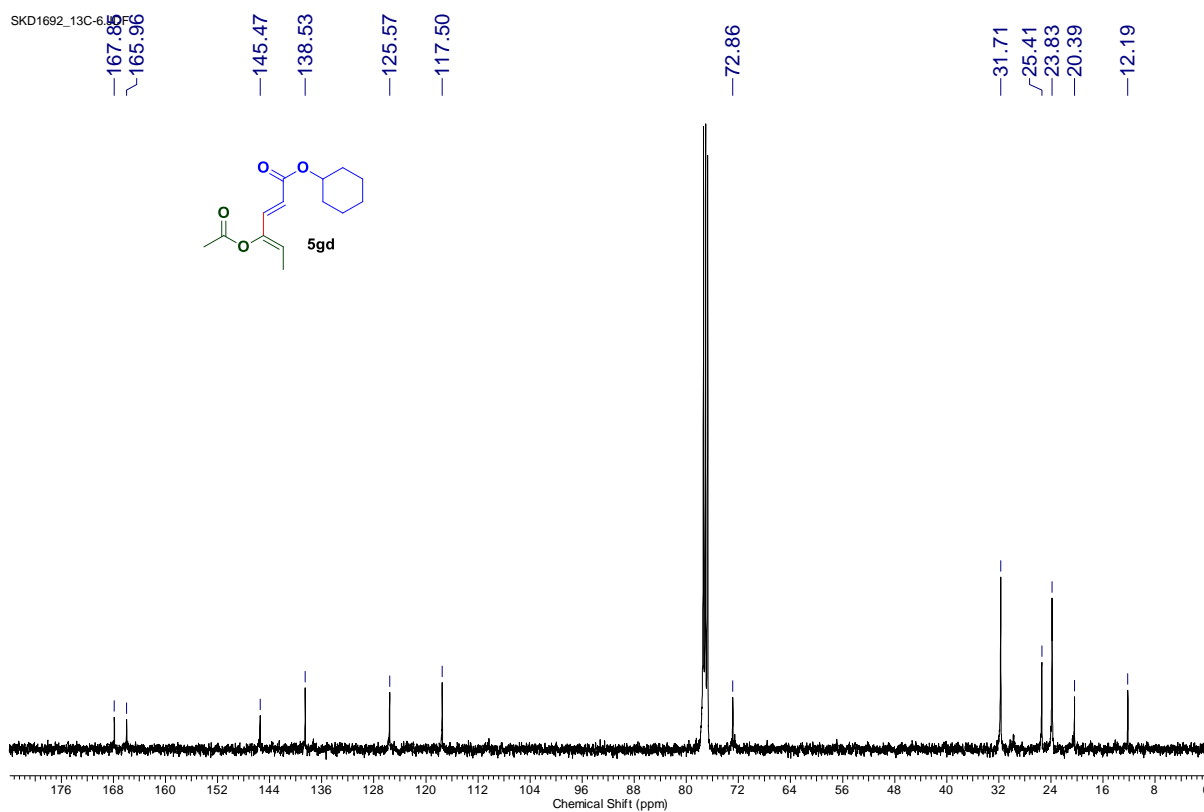

SKD0624-1H-5.JDF

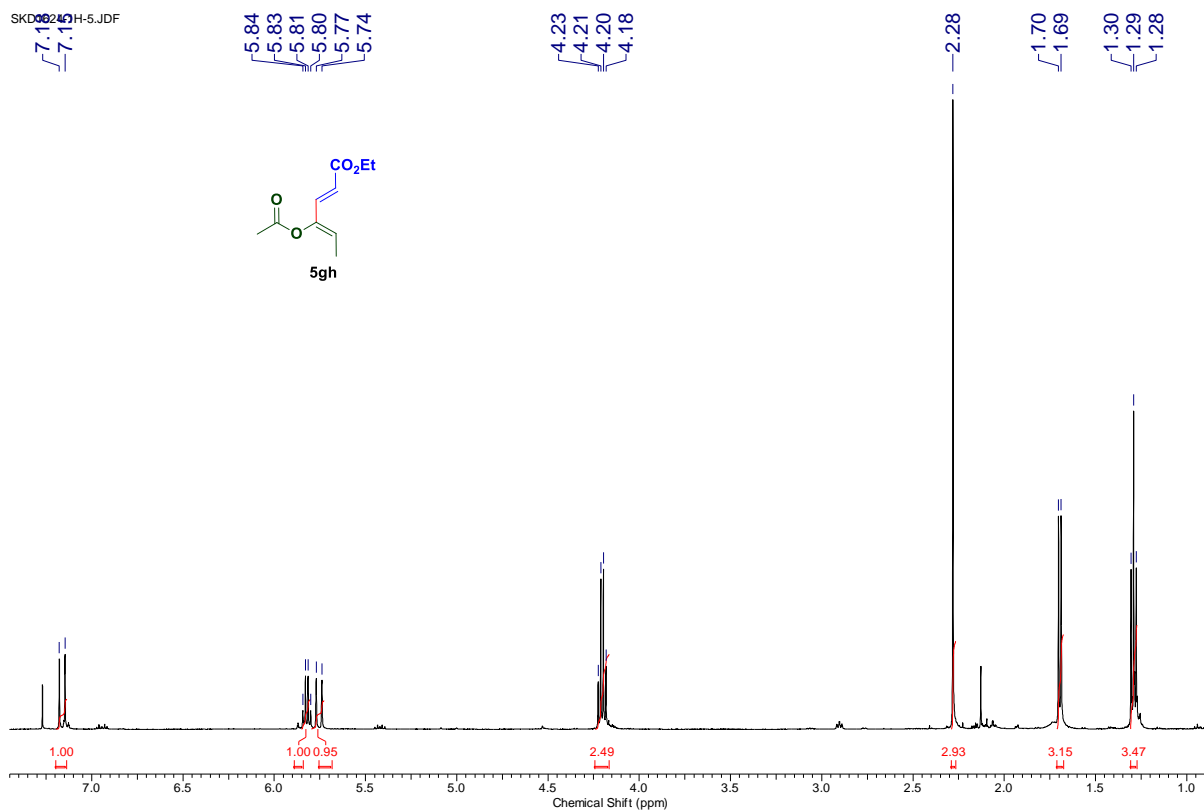

SKD1624-13C-6.JDF

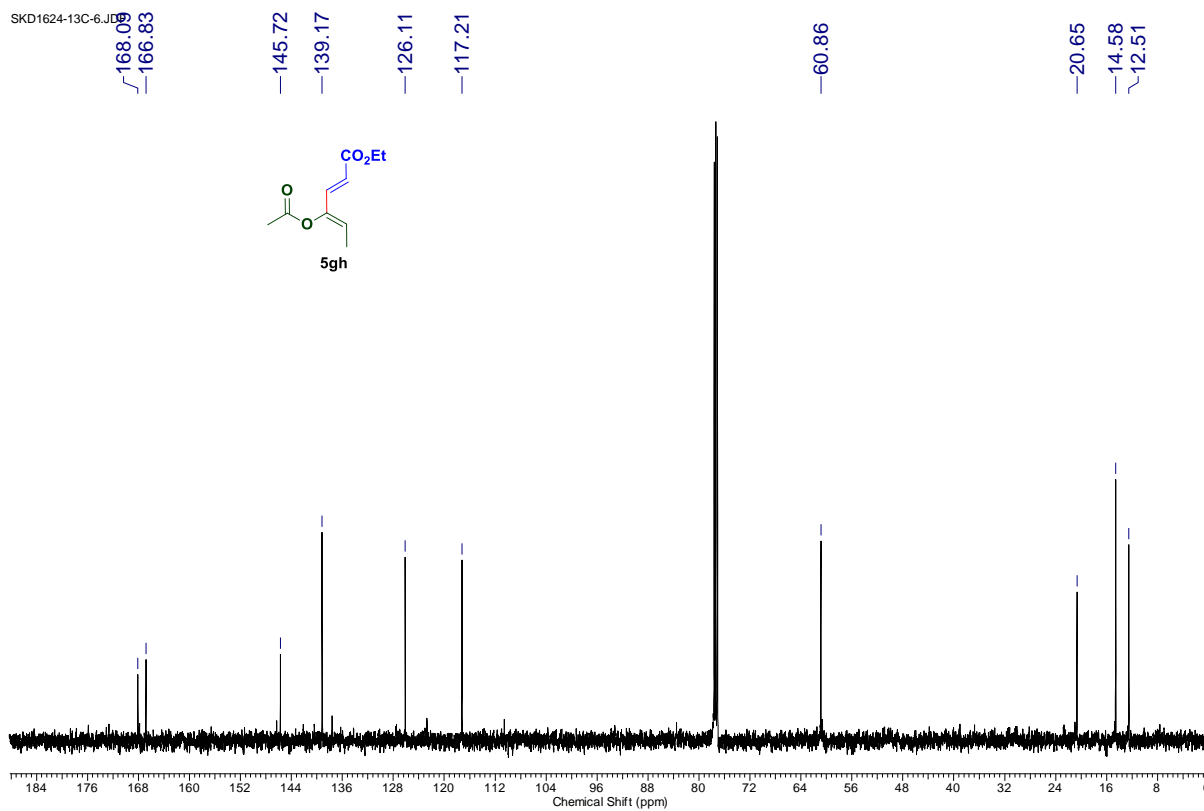

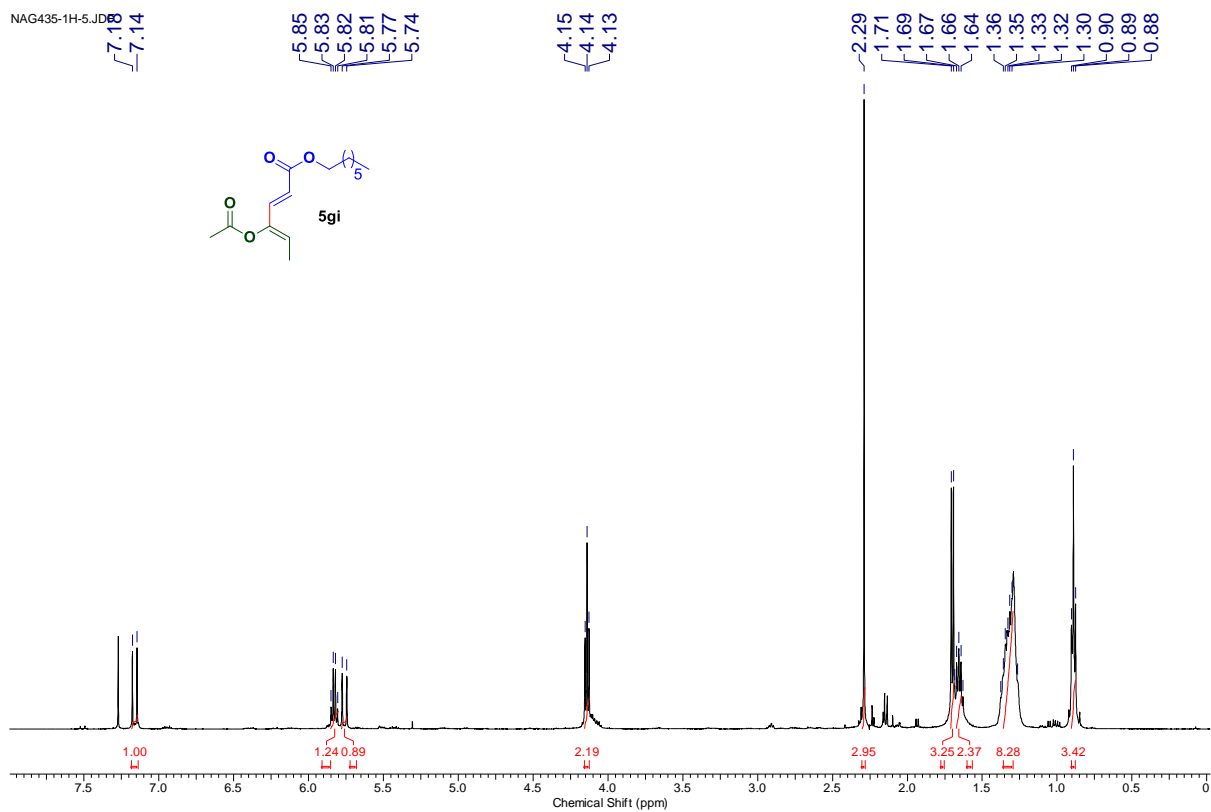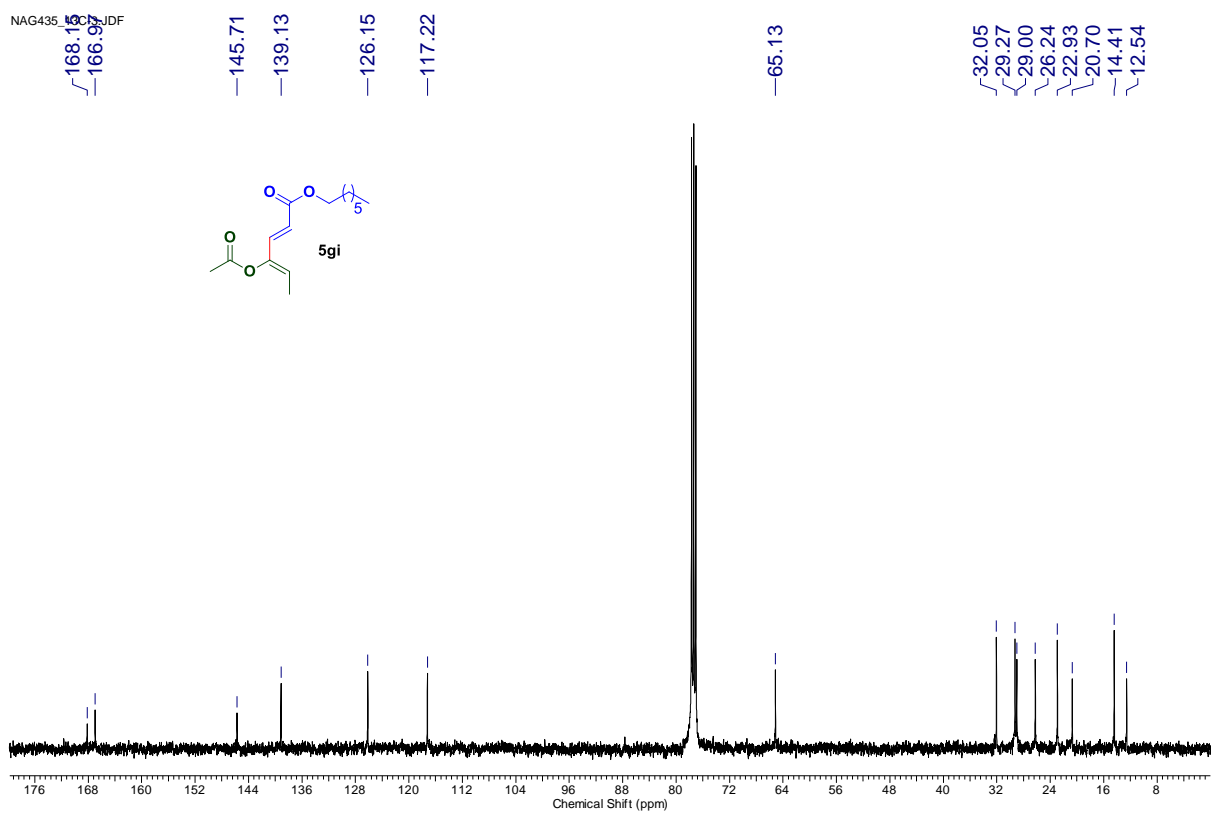

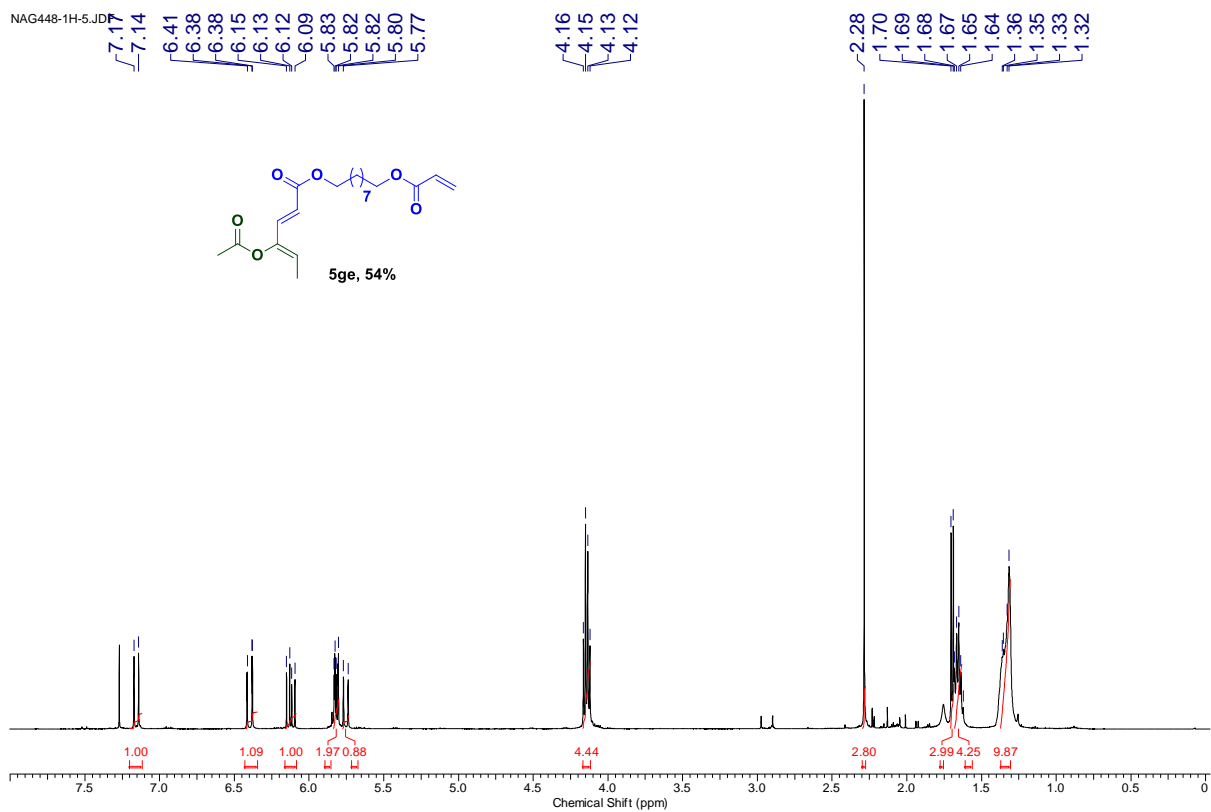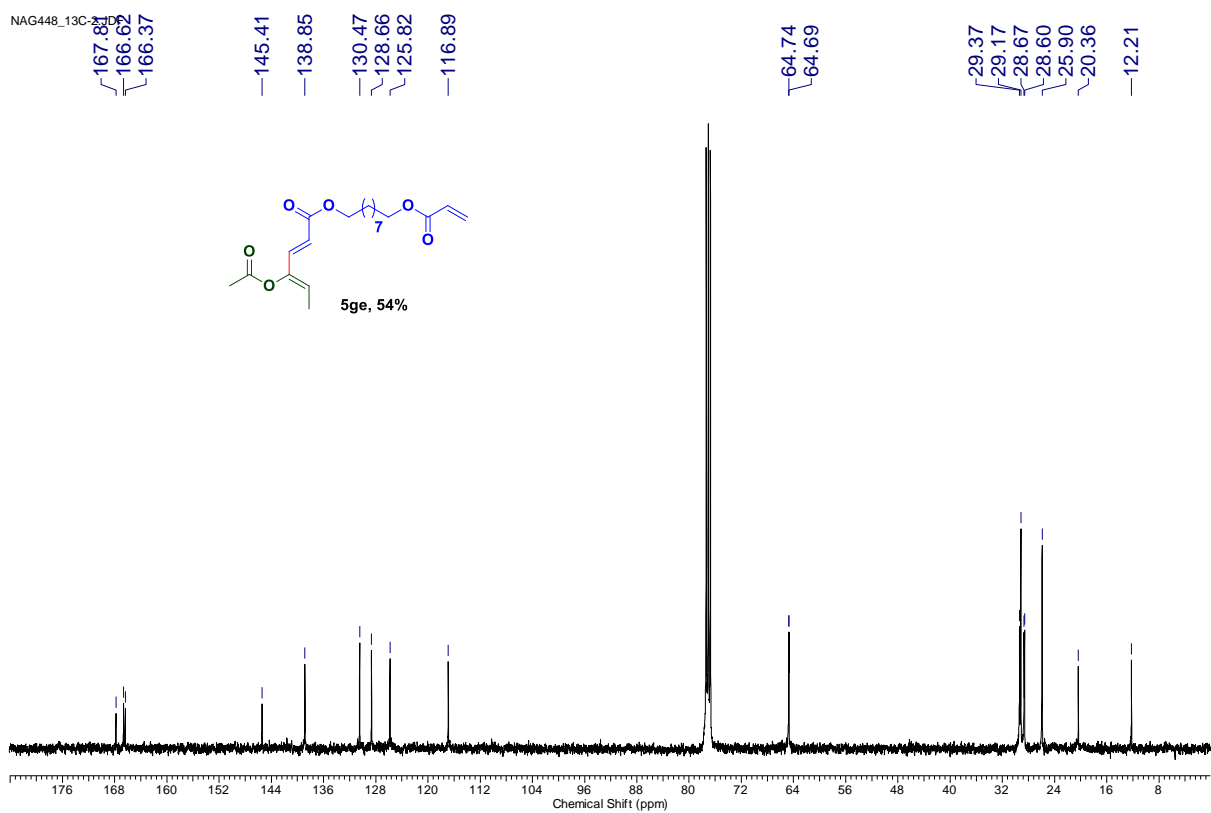

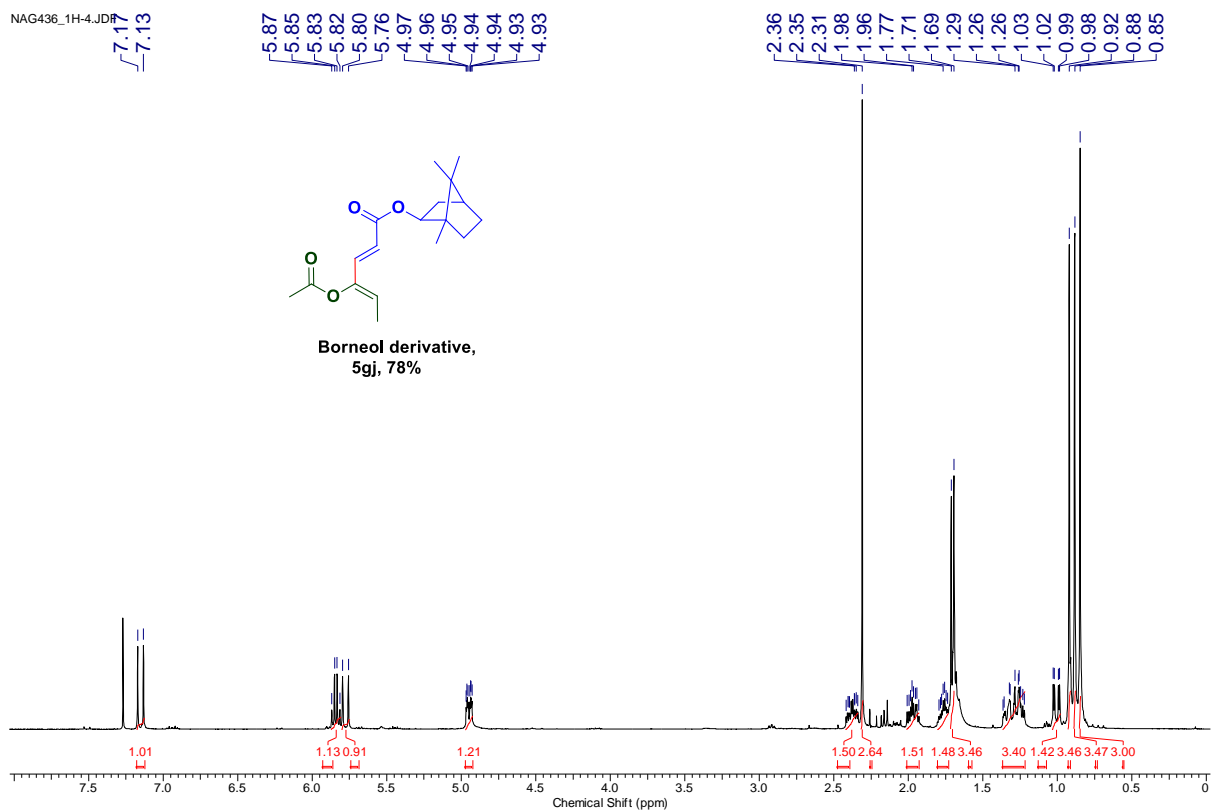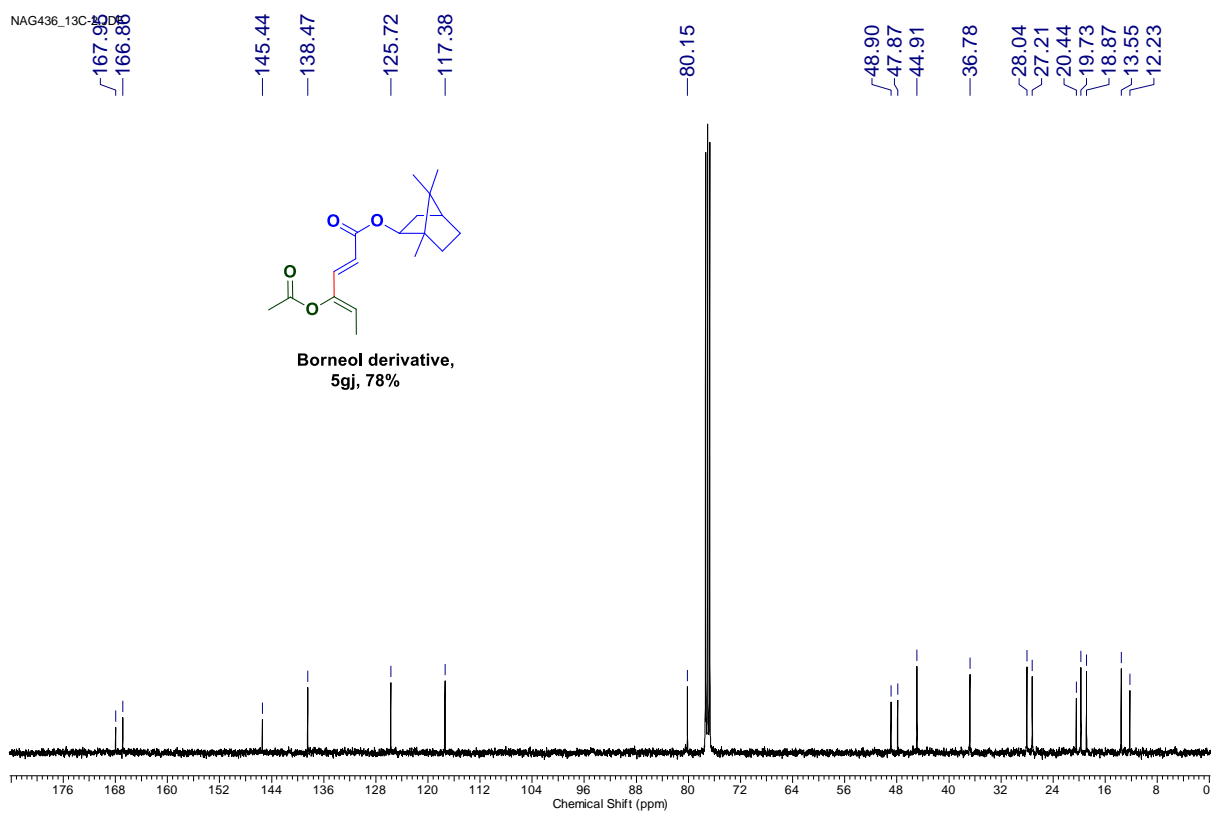

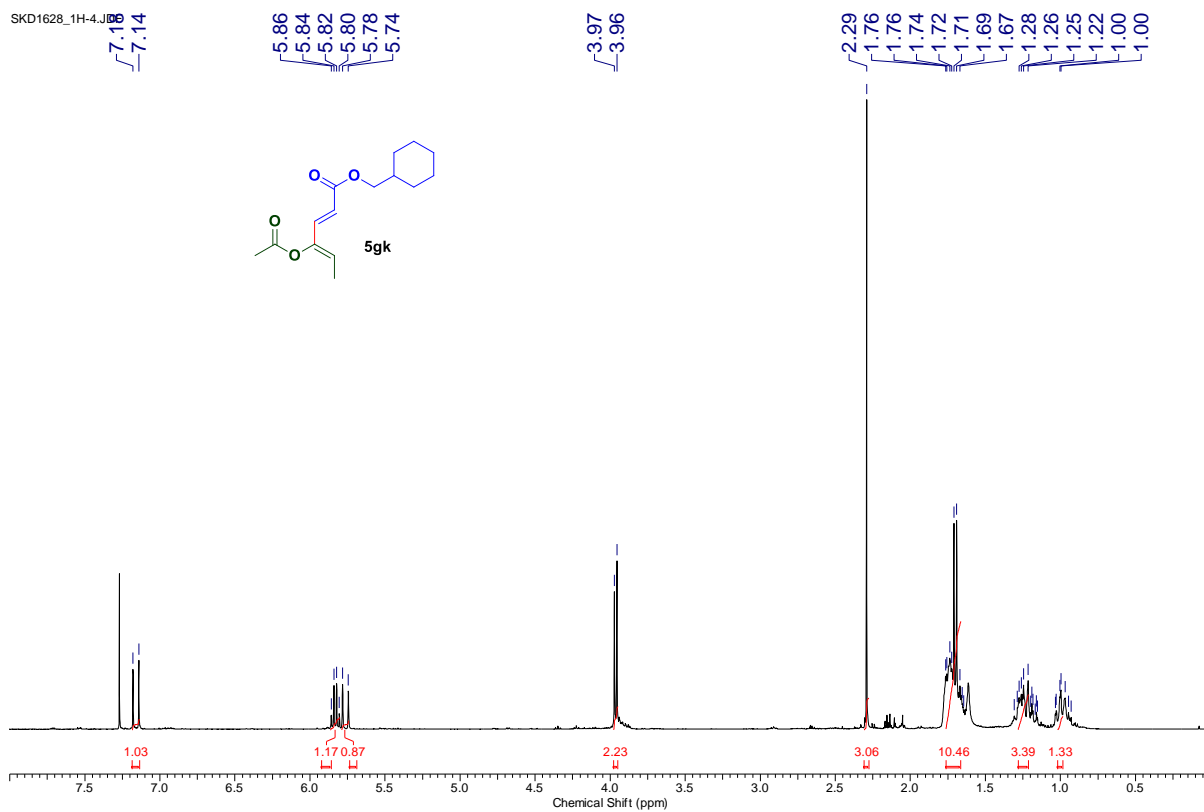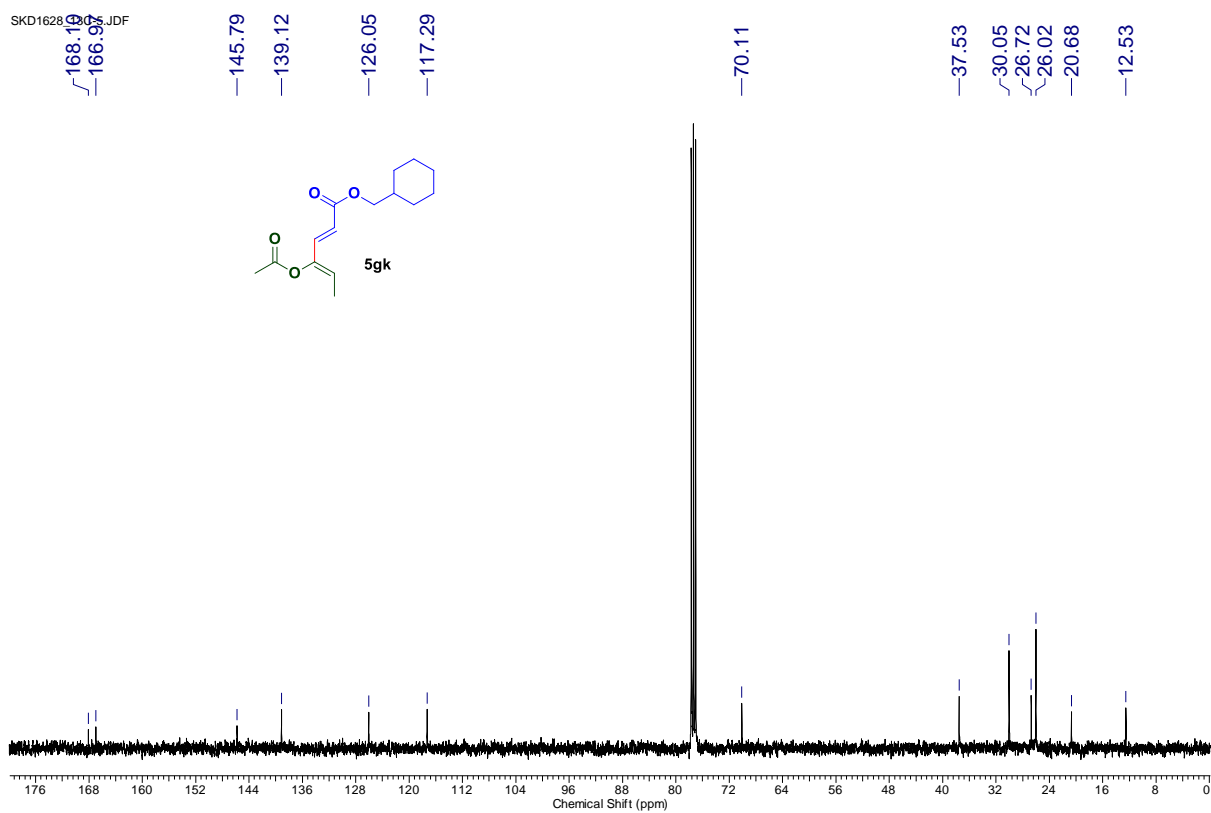

SKD1625\_1H-4JUDF

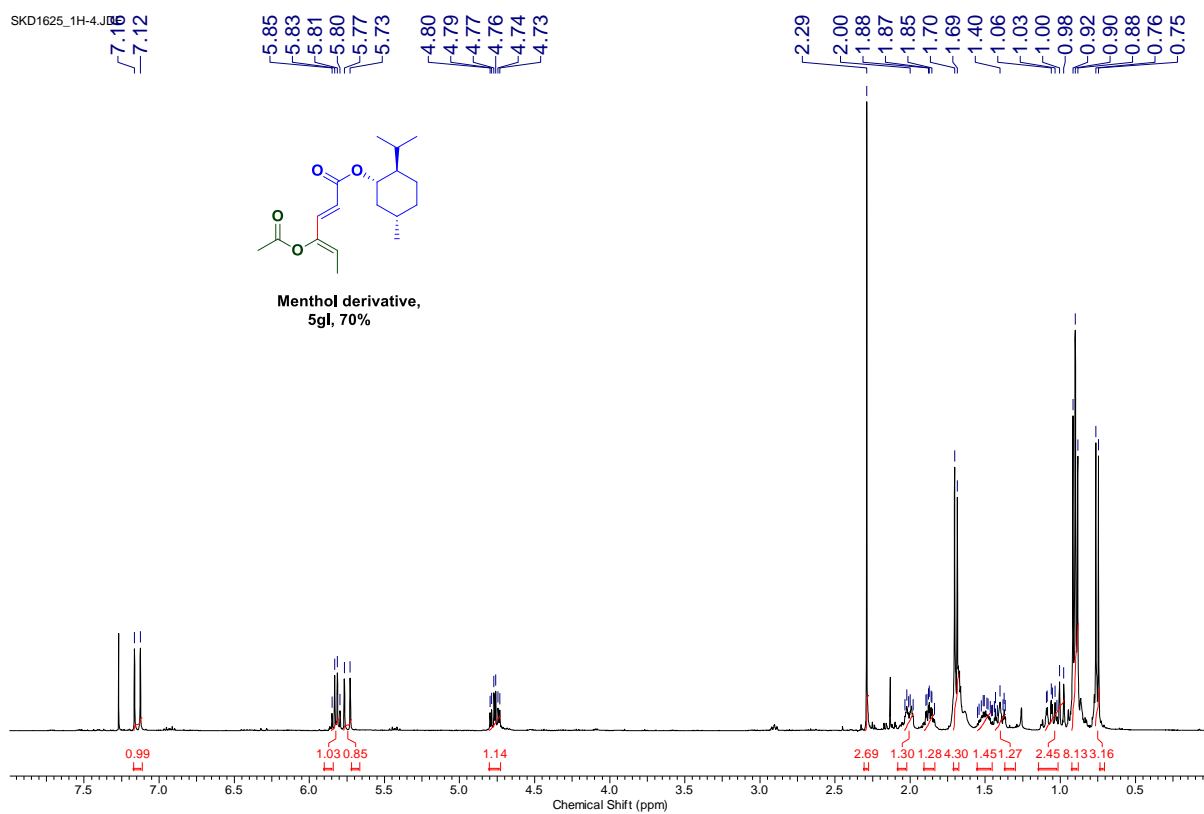

SKD1625\_13C-4JUDF

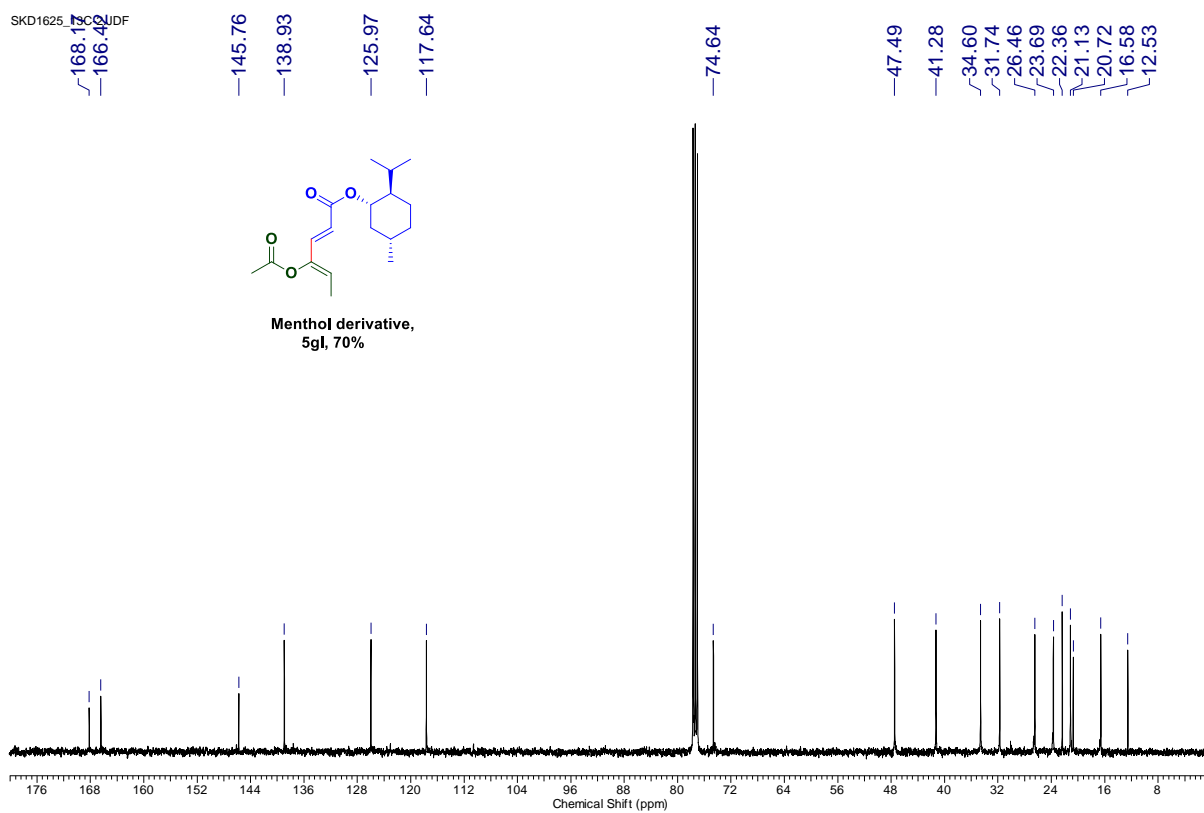

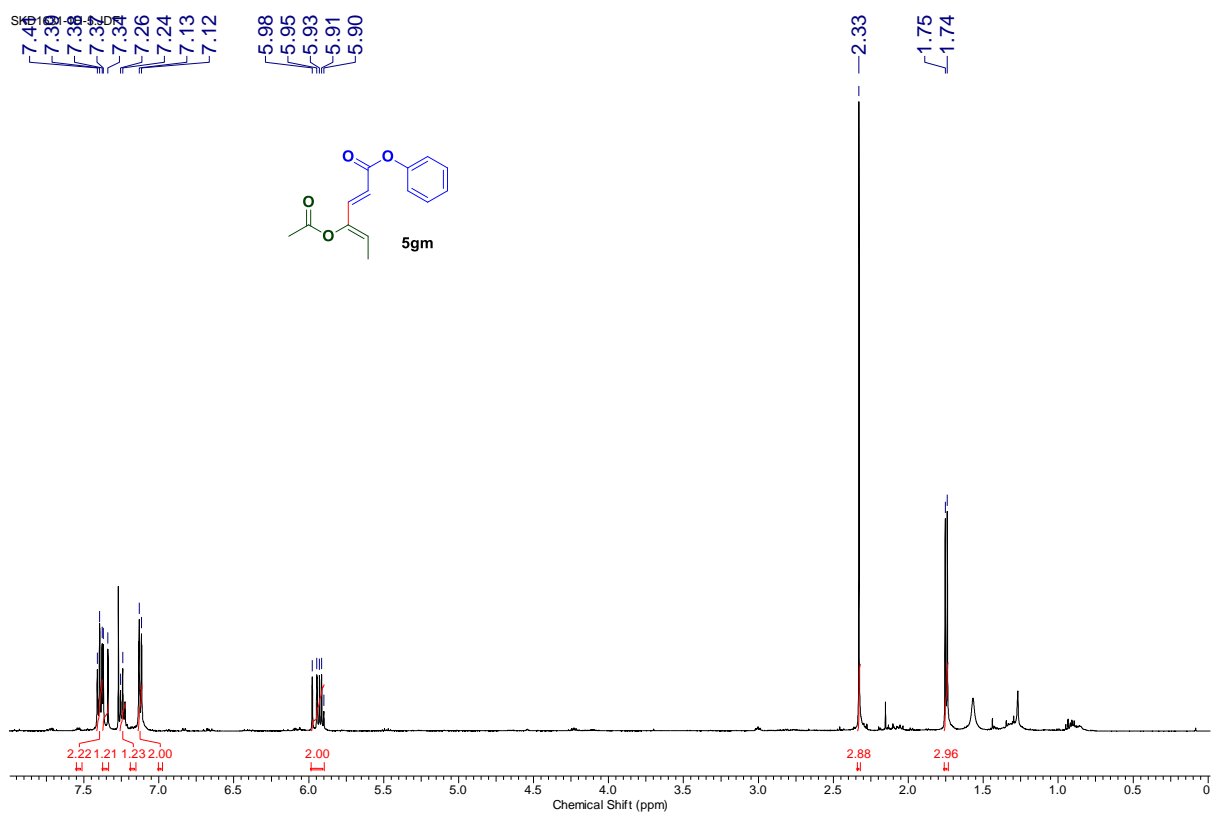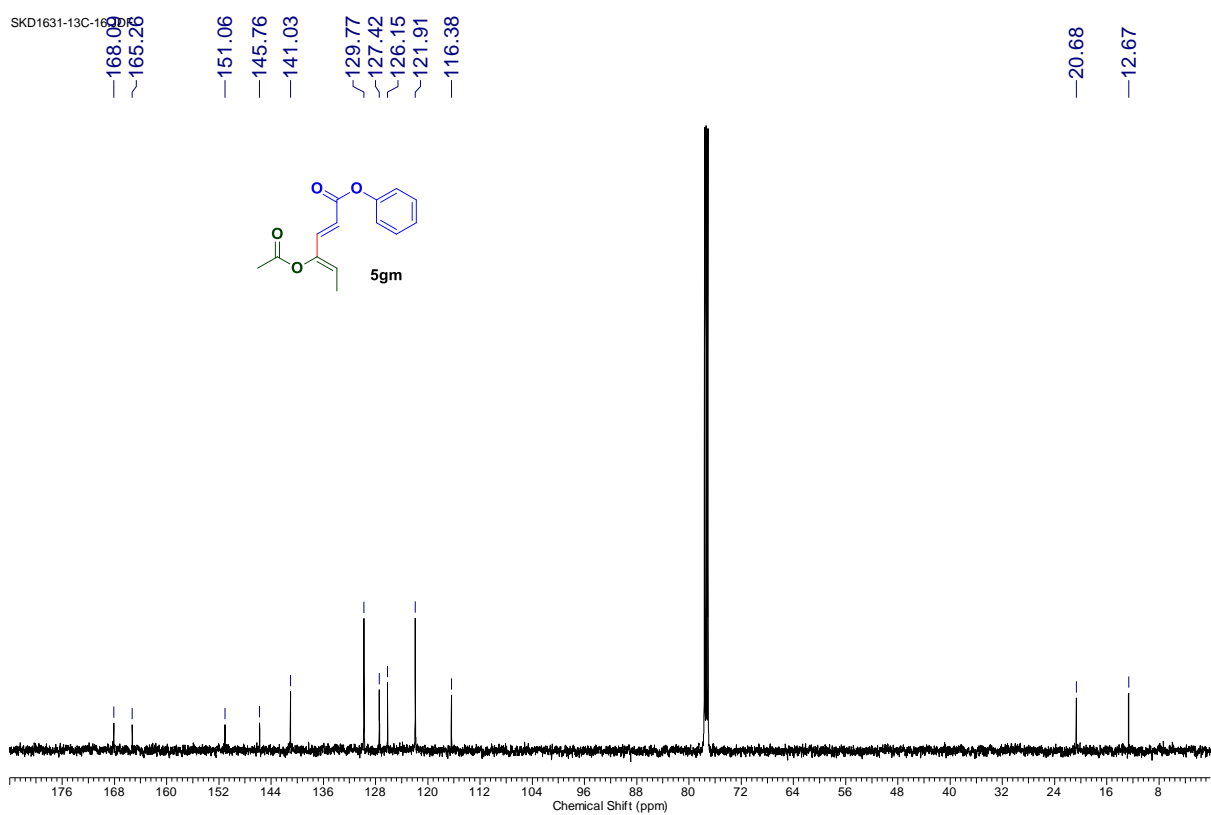

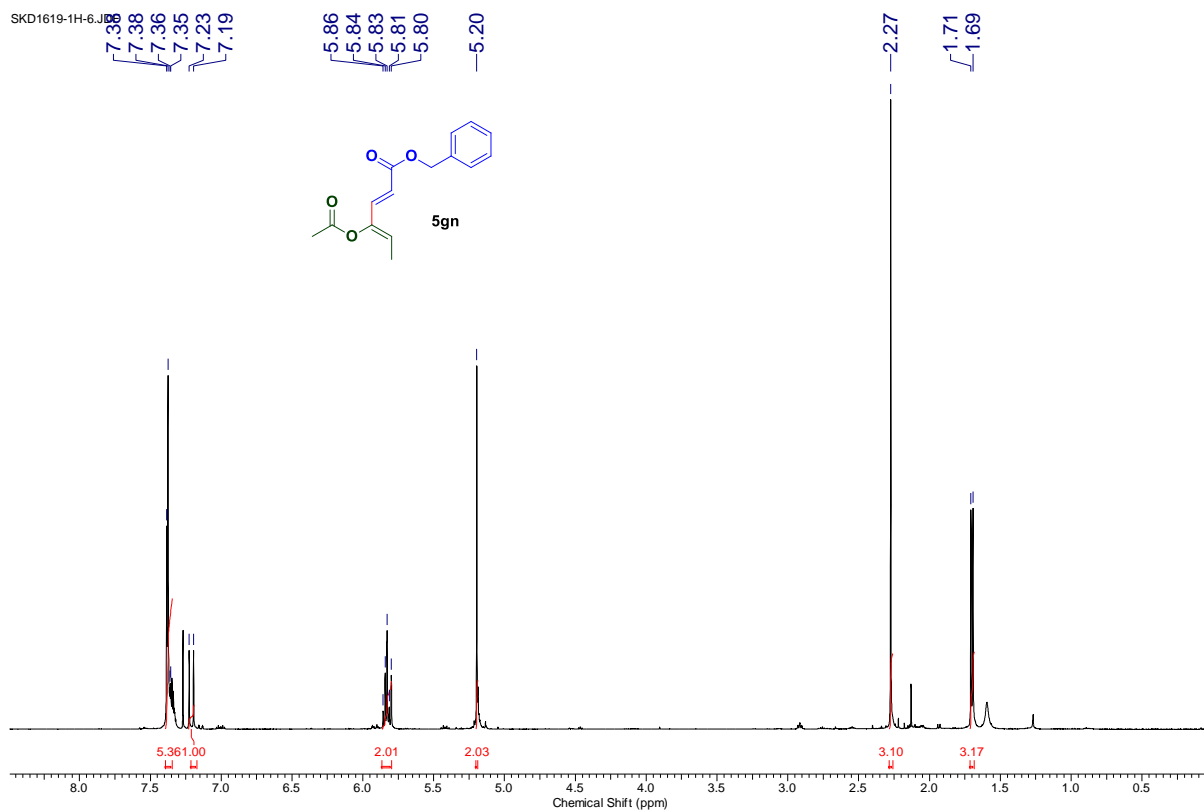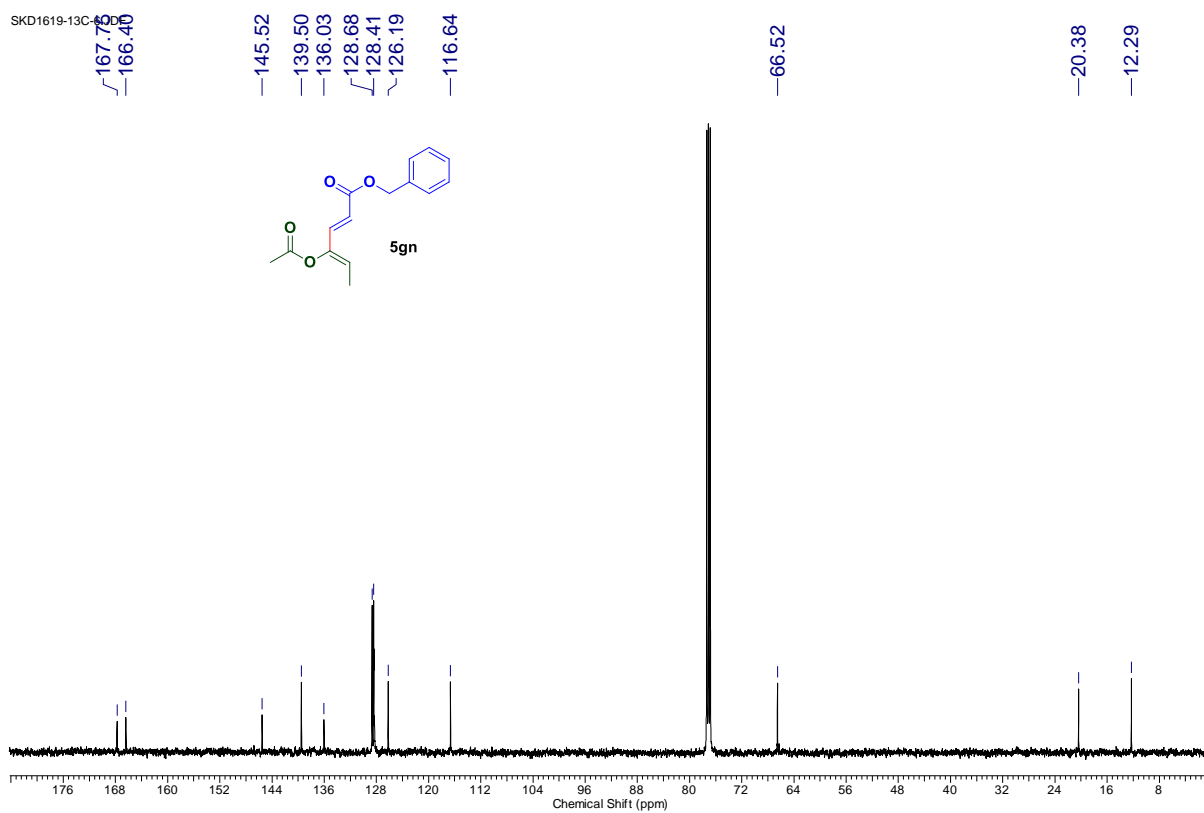

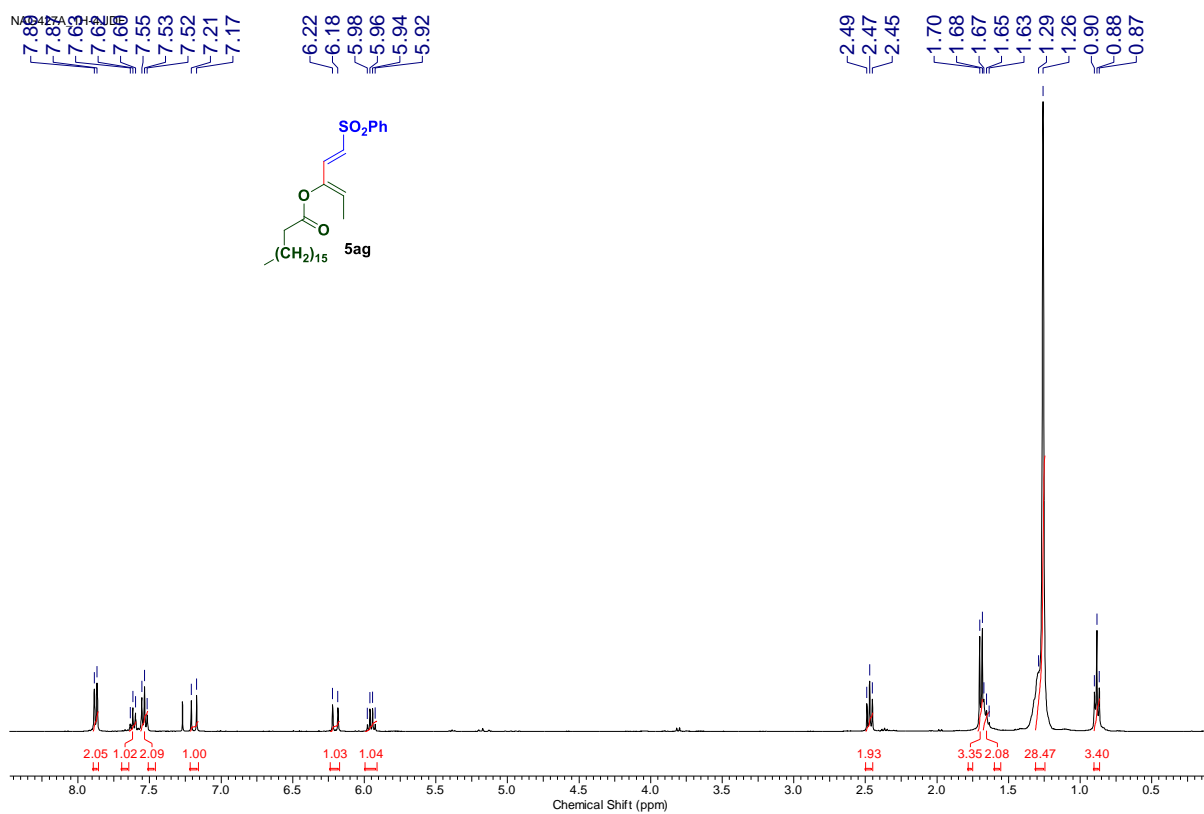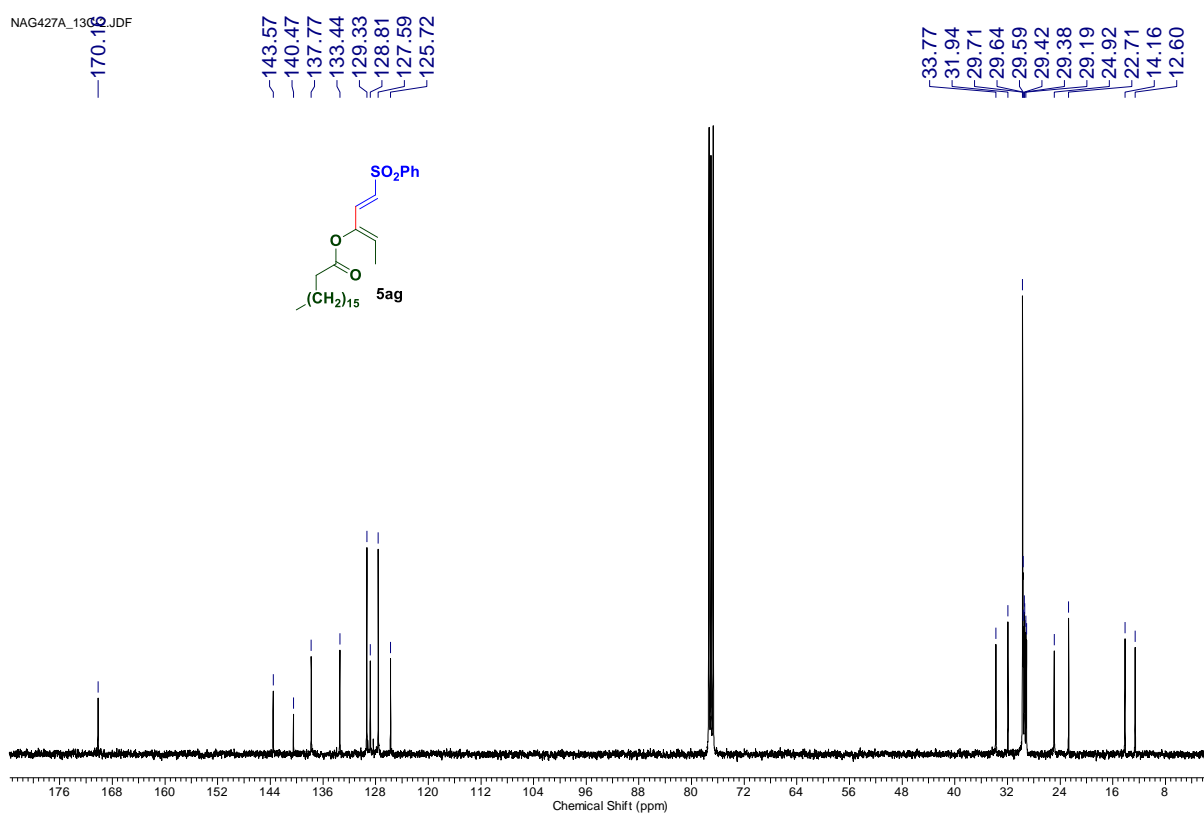

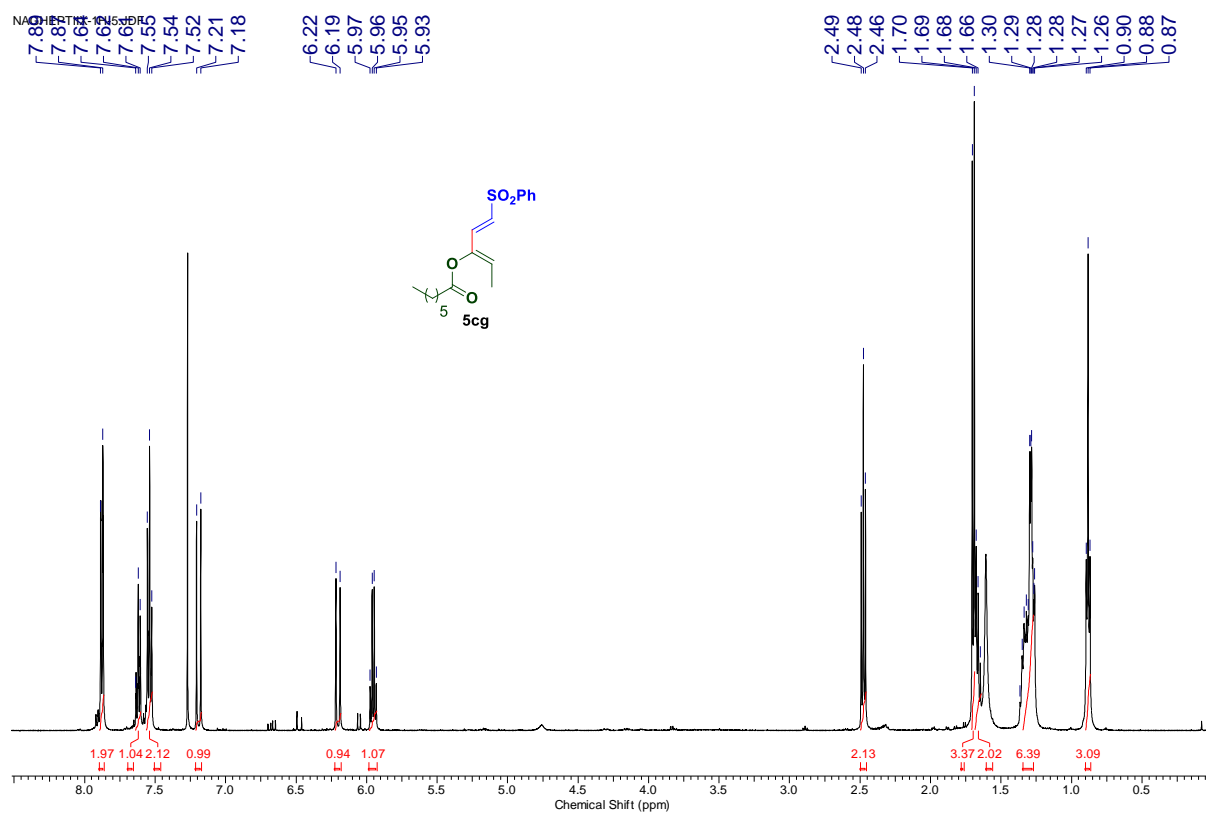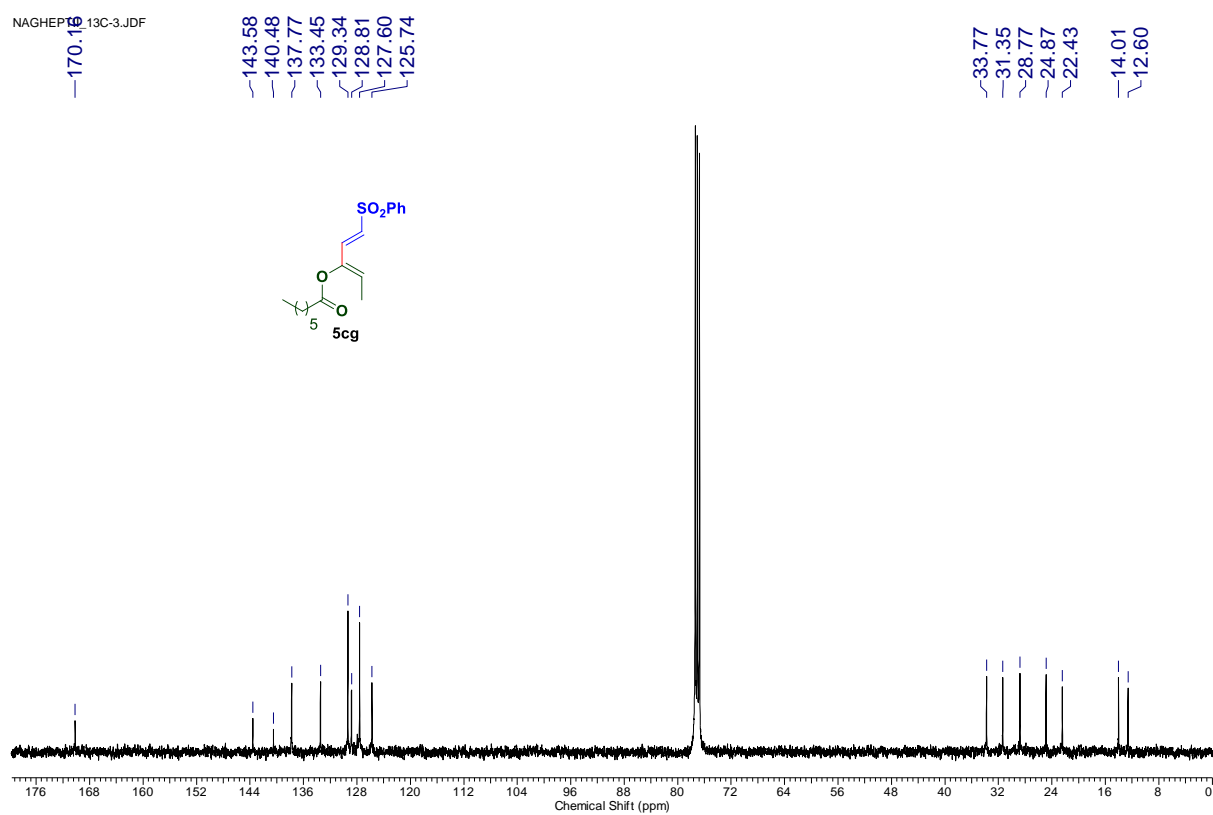

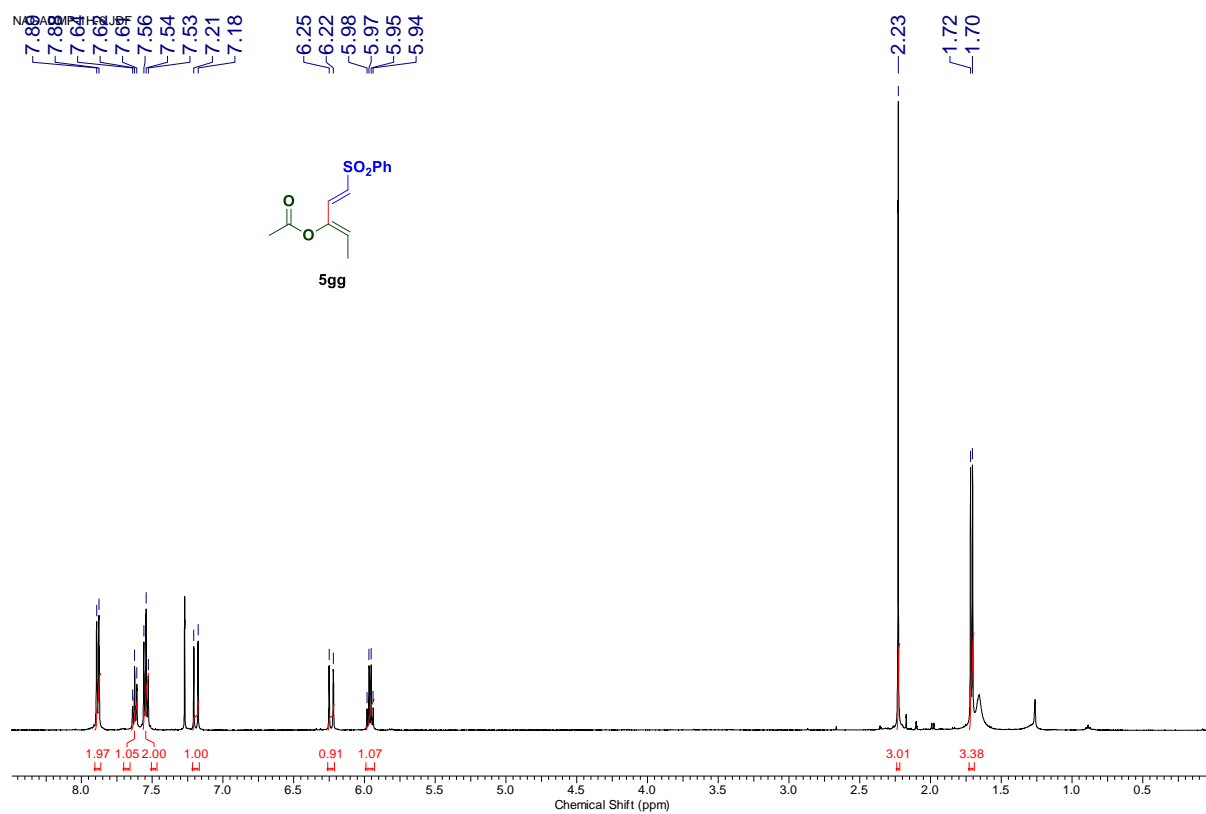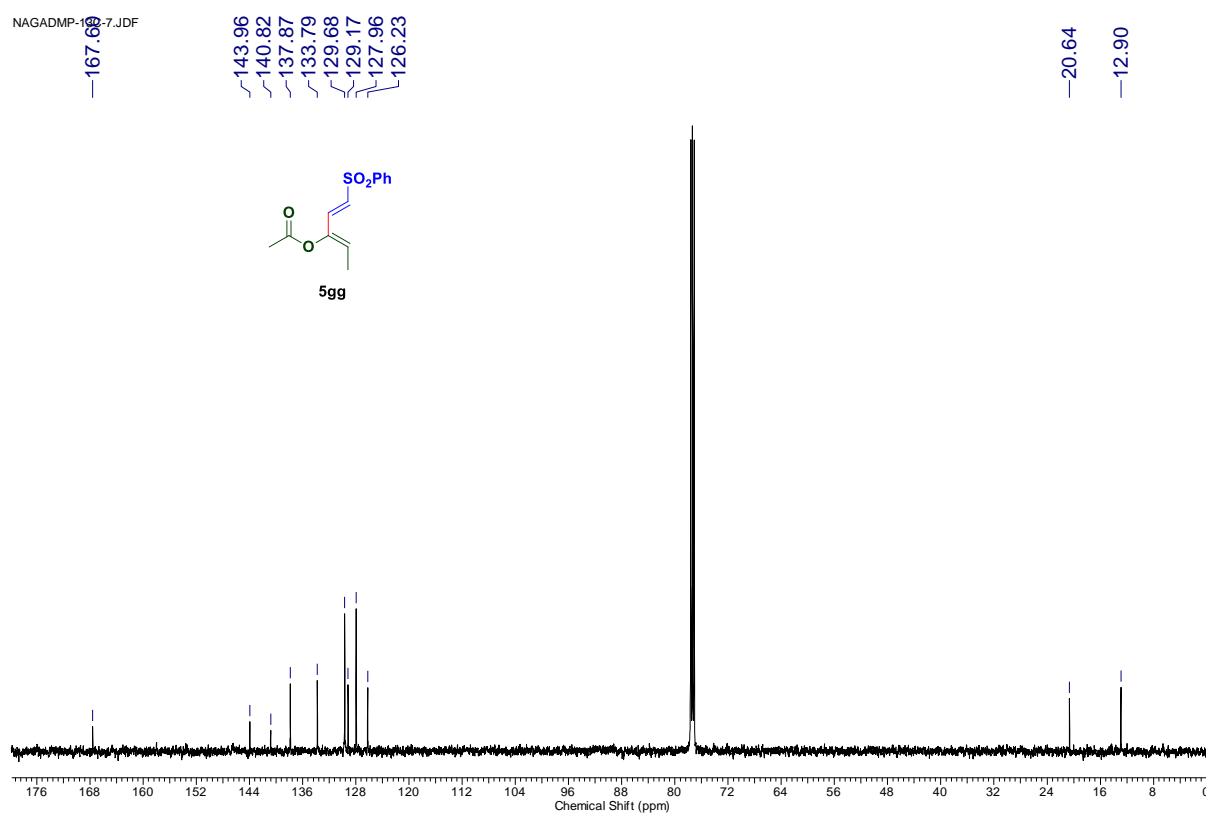

NAG1132A\_PROTON-3 (2).JDF

7.22  
7.21  
7.19  
7.08  
7.07  
7.06  
7.01  
6.99  
6.08  
6.06  
6.05  
6.04  
6.02  
6.01  
5.65  
5.61

-2.11

-1.82  
-1.81

-0.02

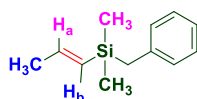

6b

$J_{\text{Ha-Hb}} = 20 \text{ Hz}$

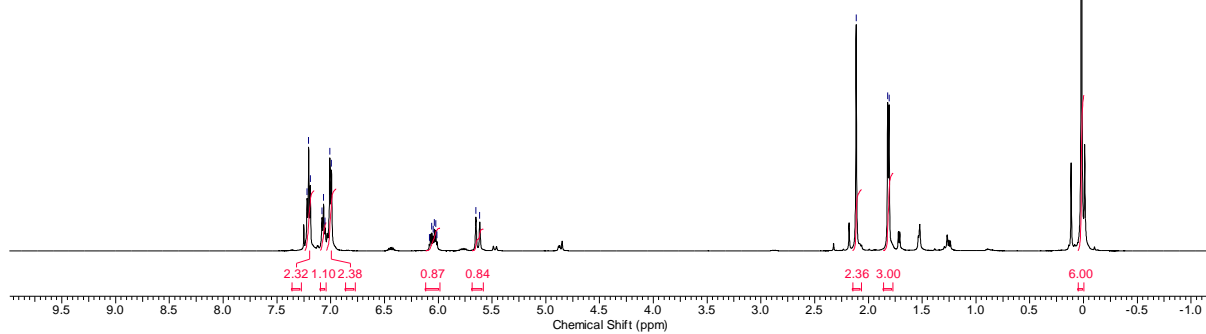

NAG1132A\_CARBON-3 (2).JDF

143.66  
140.57  
129.77  
128.59  
128.38  
124.20

-77.36

-26.55  
-22.98

-2.99

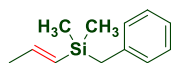

6b

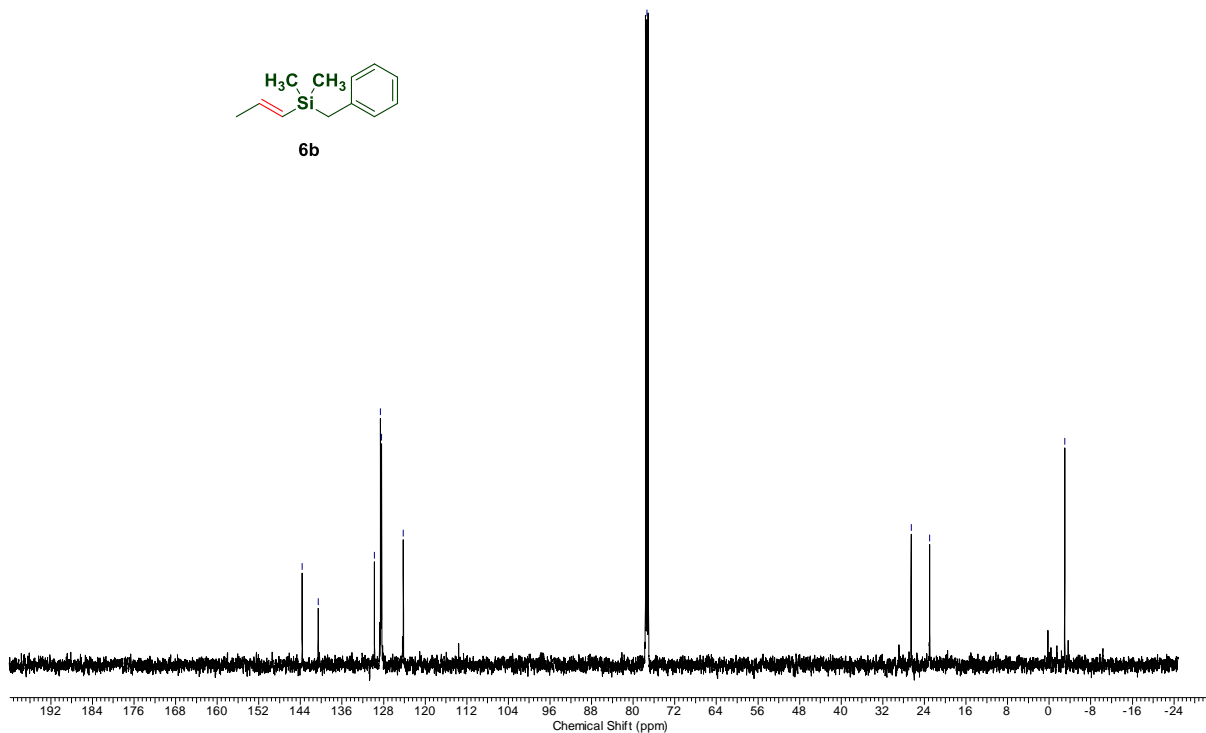

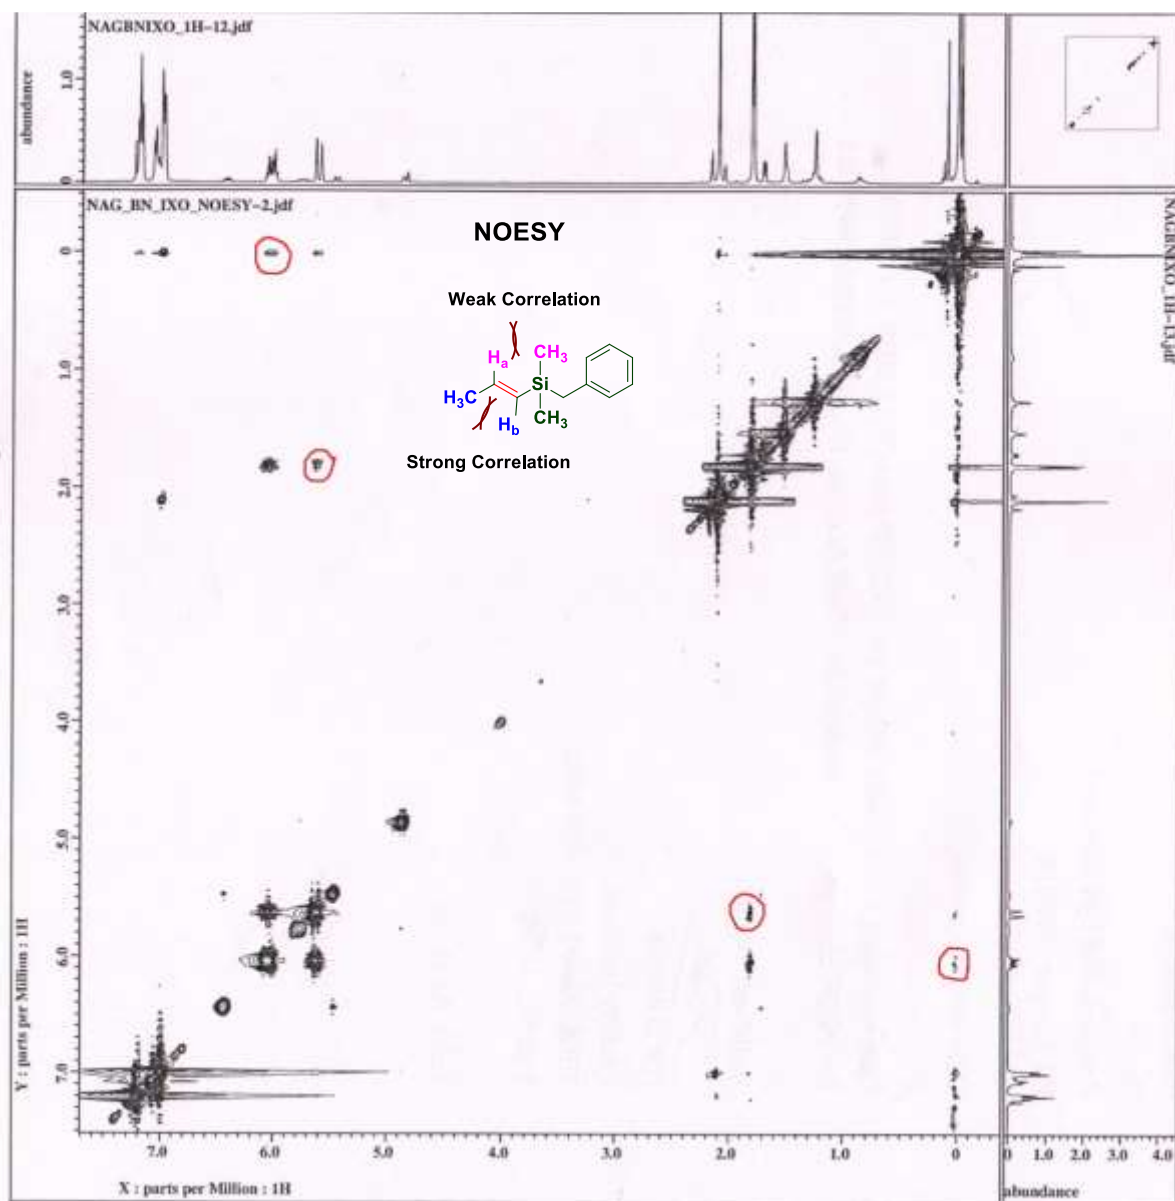

NAG1140DP\_PROTON-4 (3).JDF

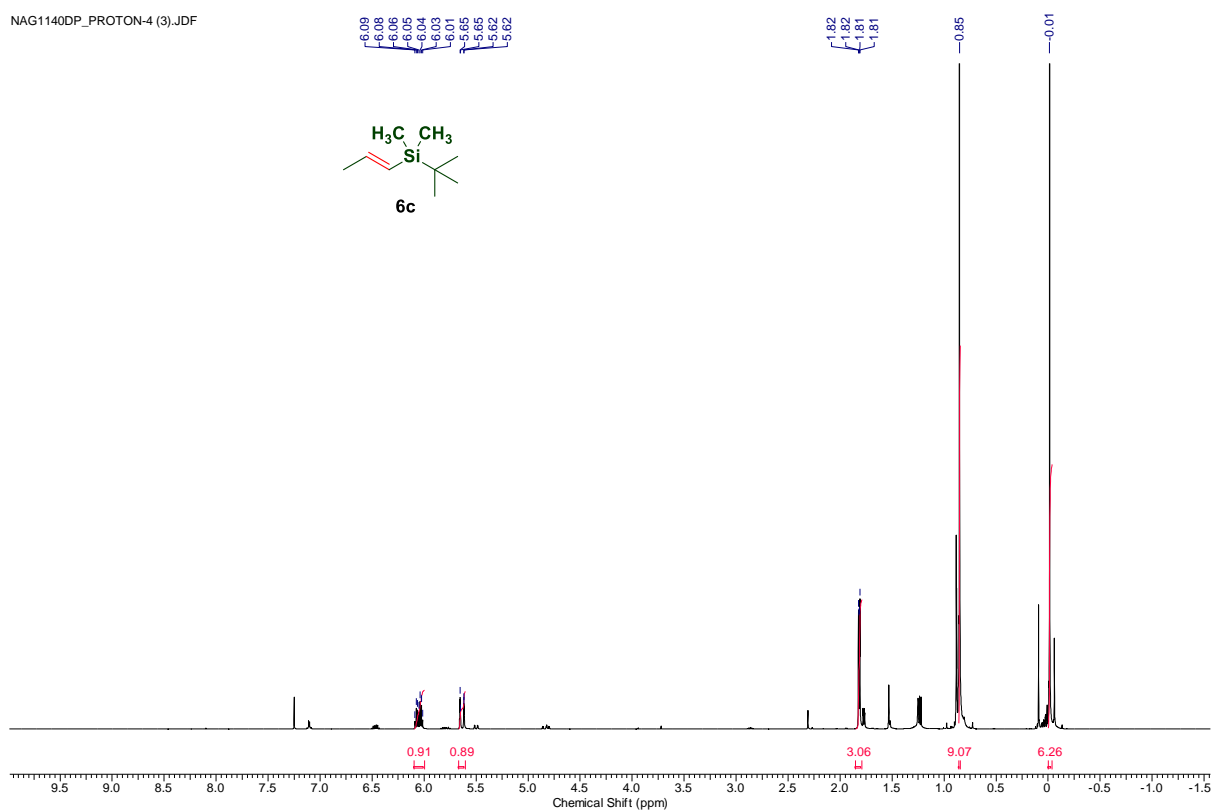

NAG1140DP\_CARBON-3 (1).JDF

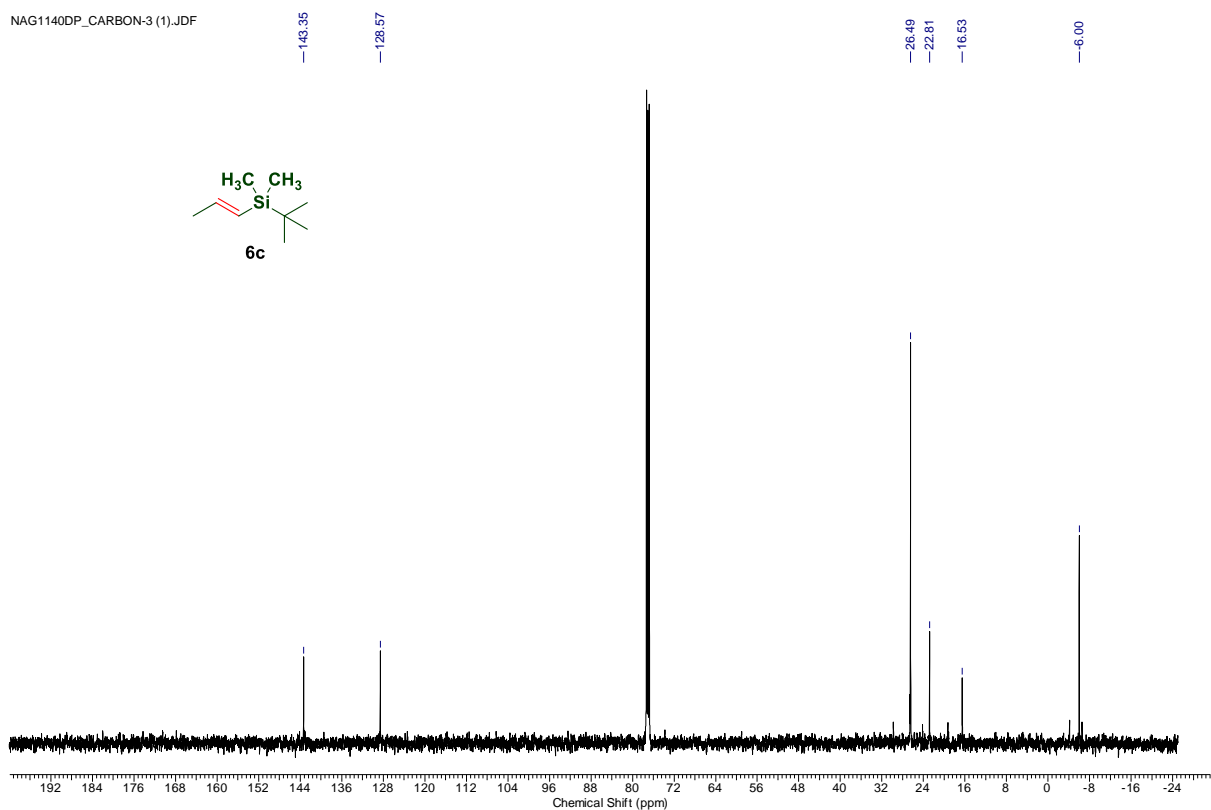

NAG1127\_PROTON-5 (1).JDF

7.63  
7.62  
7.40  
7.38  
7.37  
7.36  
7.34

6.09  
6.09

1.93  
1.92

1.09

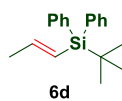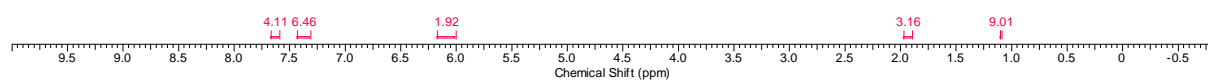

NAG1127\_13C-2.JDF

147.85

136.36

135.24

129.05

127.57

124.73

27.85

23.14

18.22

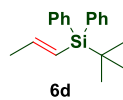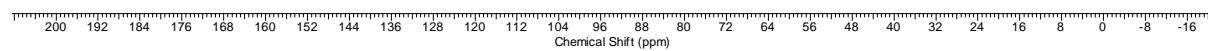

NAG1140C\_1H-4 (2).JDF

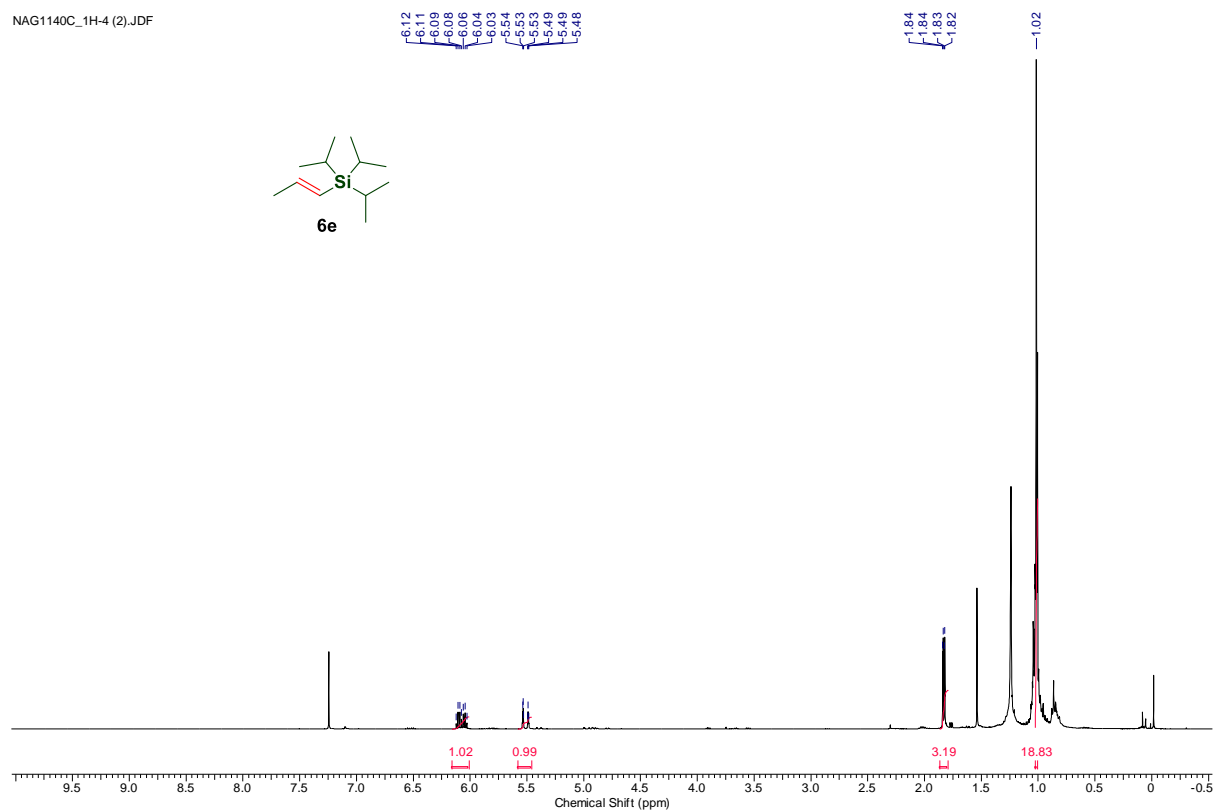

NAG1140C\_13C-3.JDF

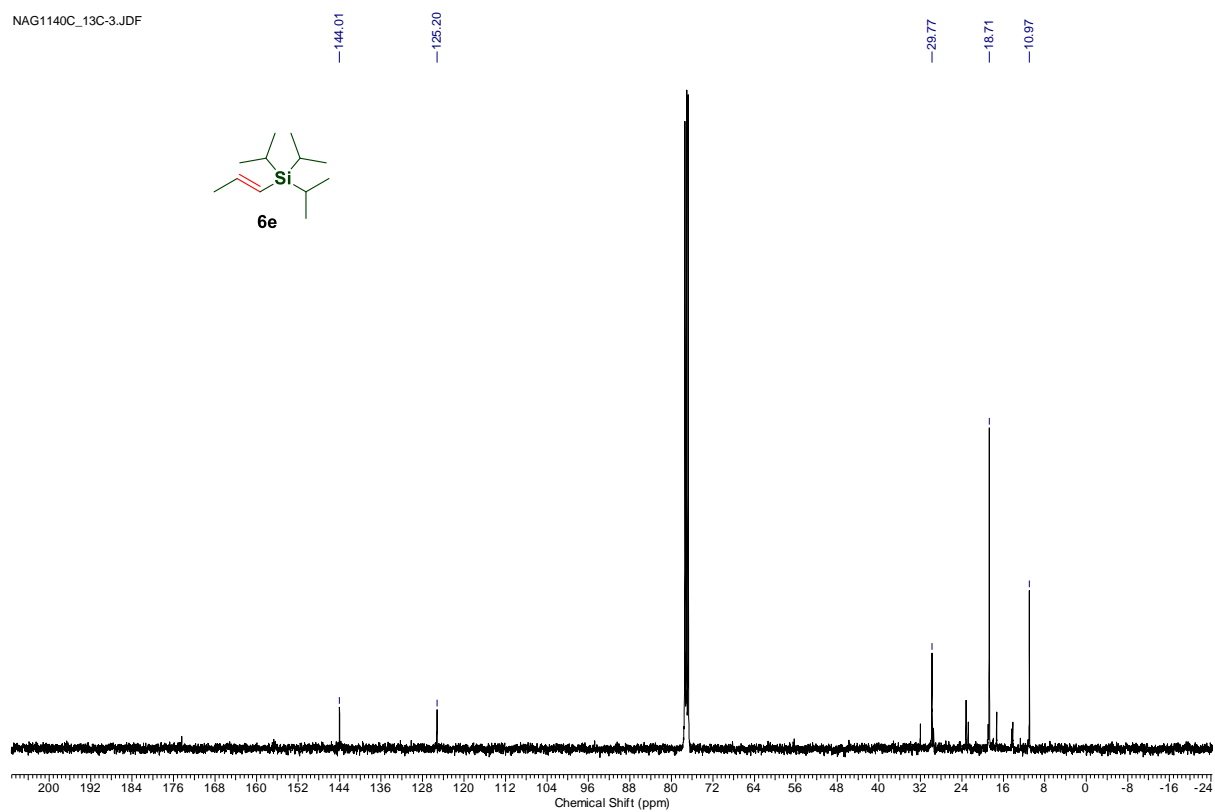

NAG1126BPP\_1H-4 (2).JDF

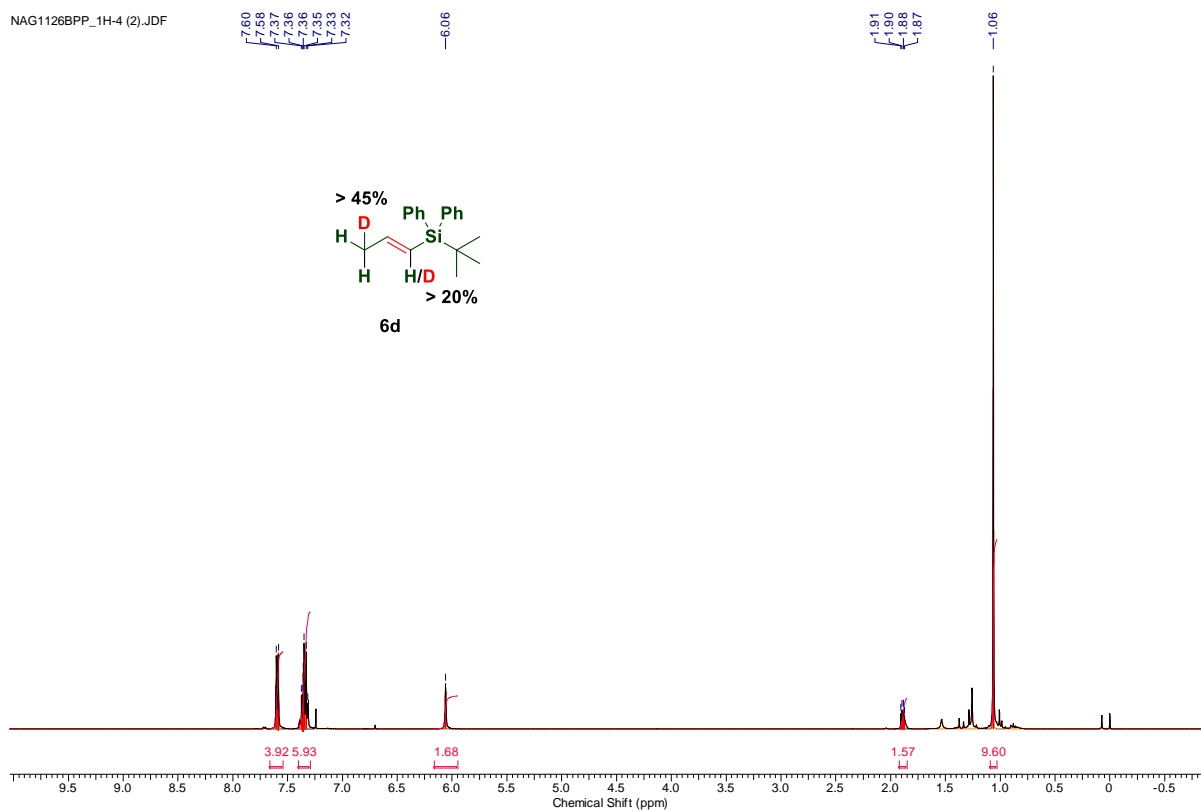

NAG1126BPP\_13C-7 (3).JDF

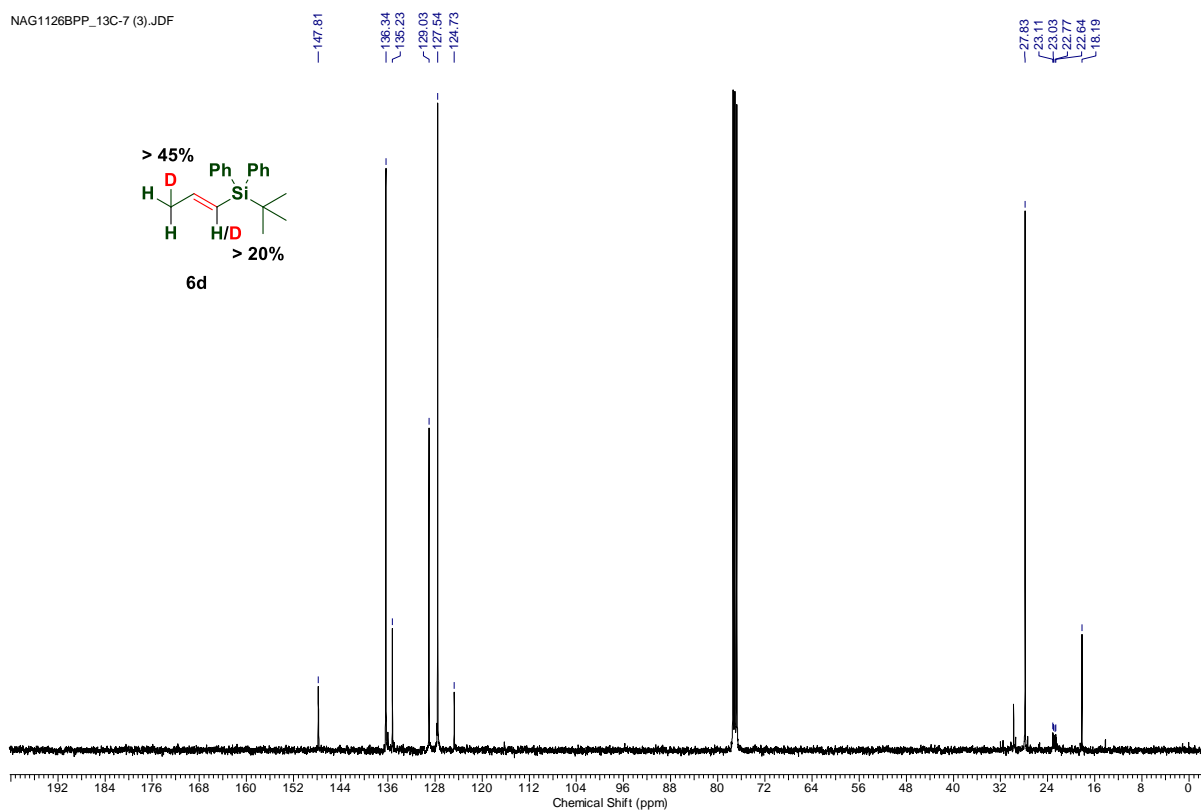

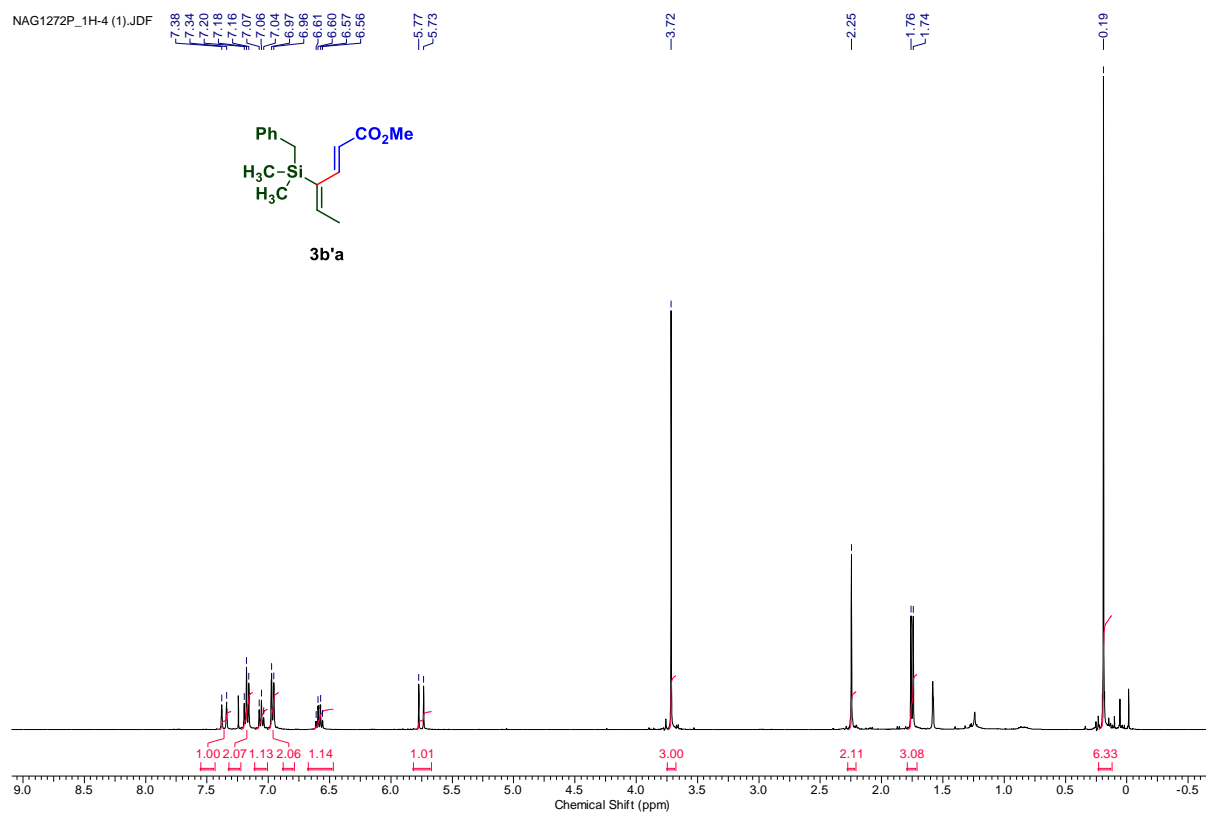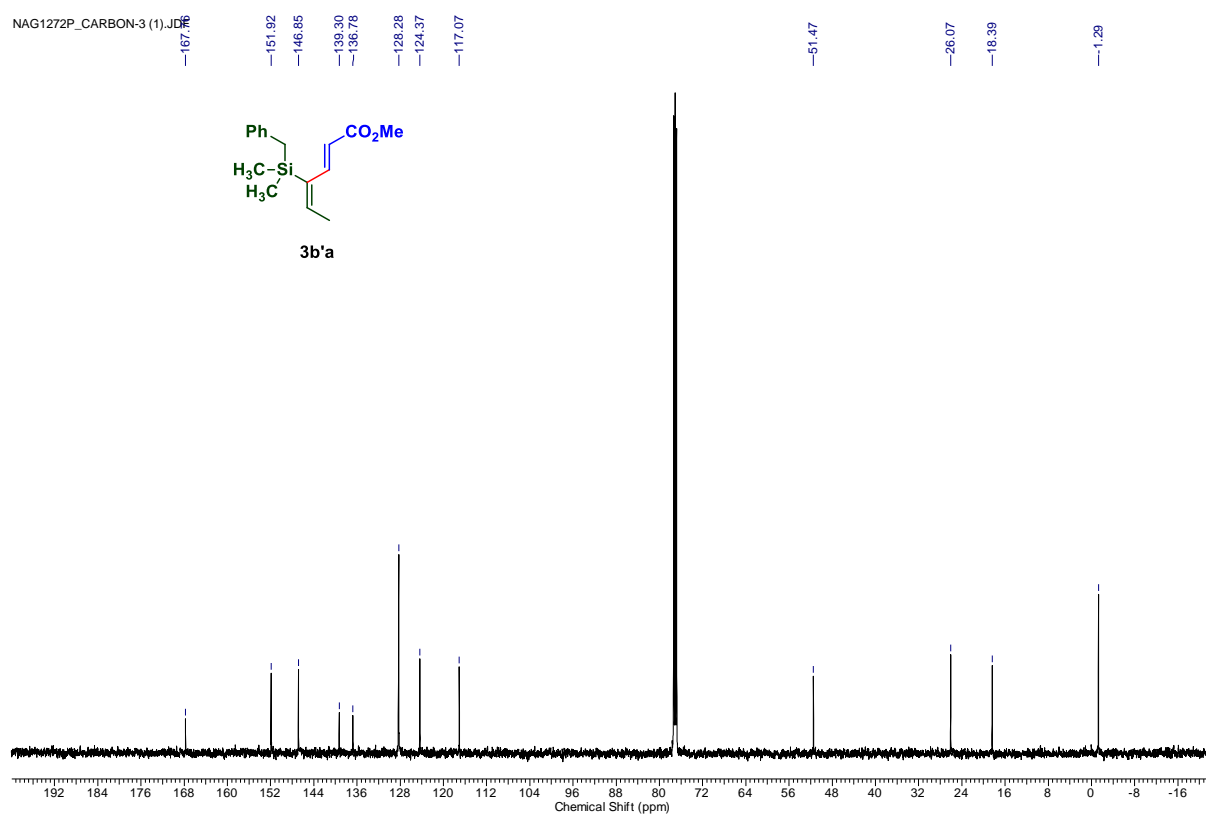

NAG1152PP\_PROTON-3 (2).JDF

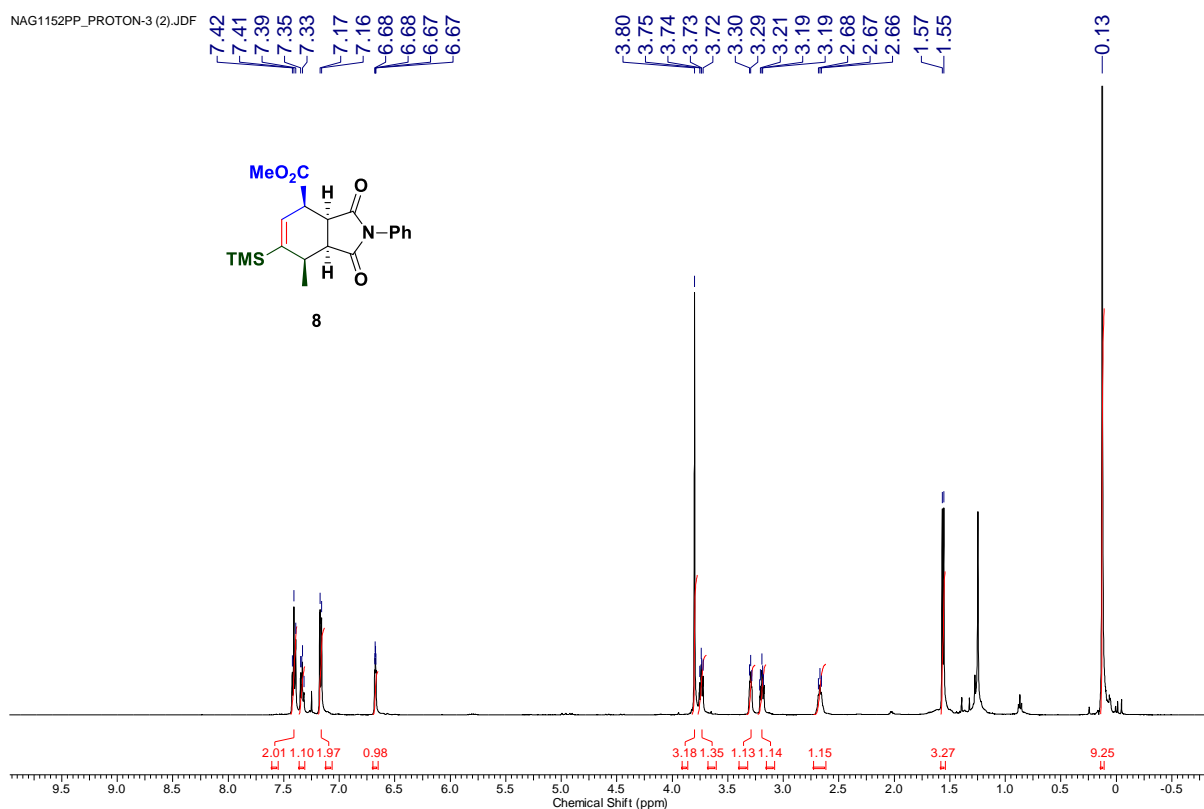

NAG1152PP\_CARBON-3 (2).JDF

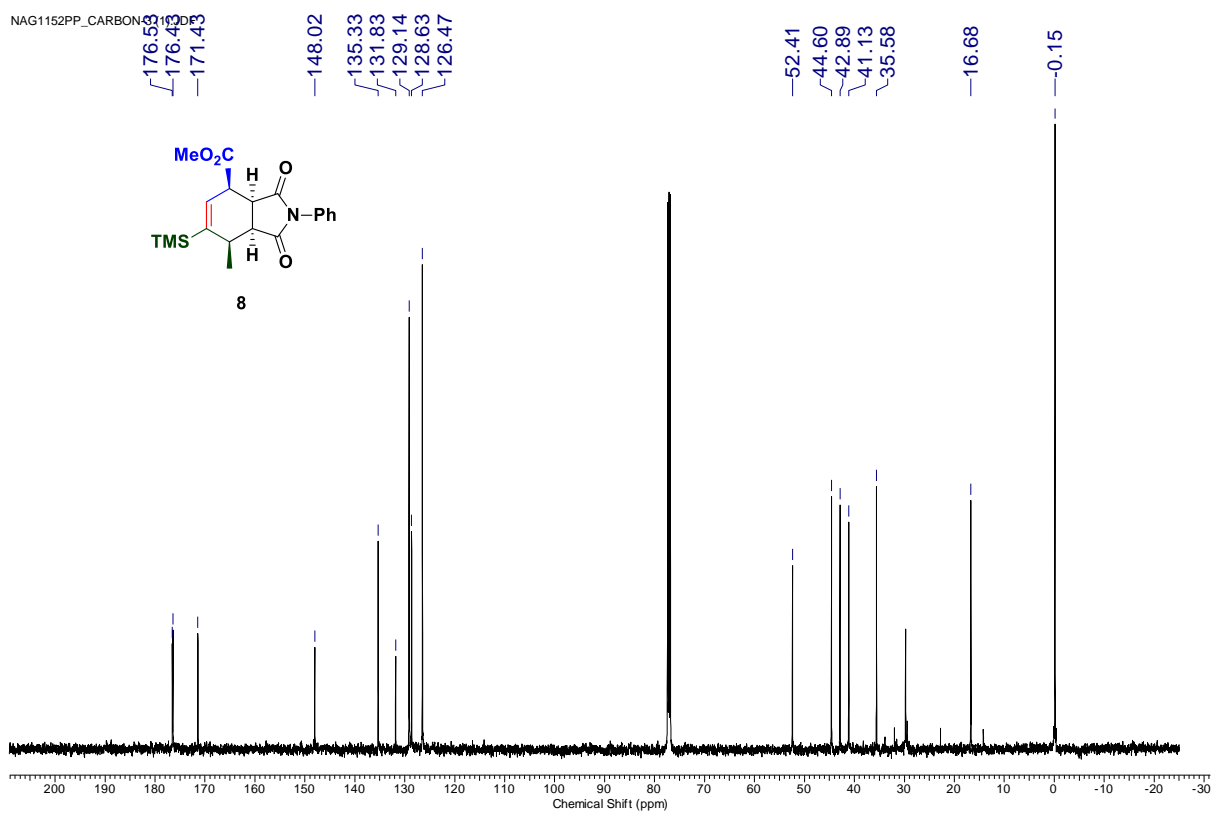

NAG499B\_1H-4.JDF

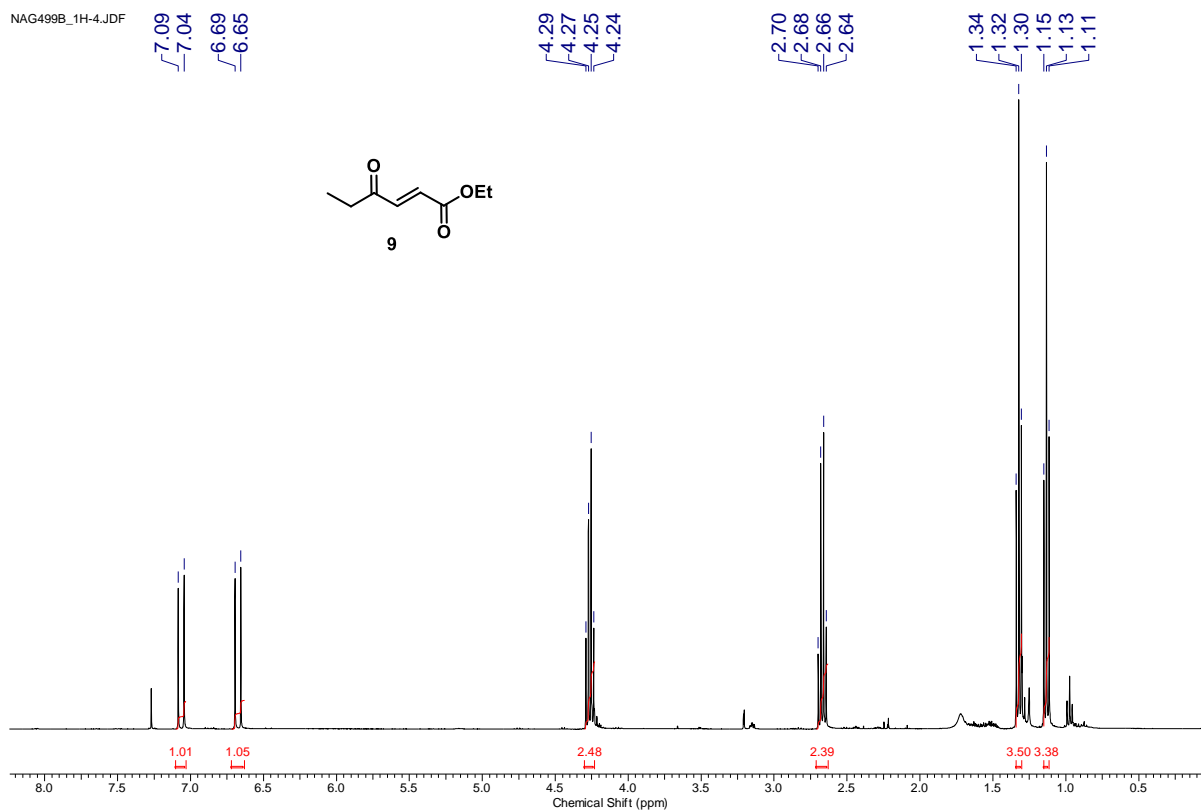

NAG499B\_13C-1.JDF

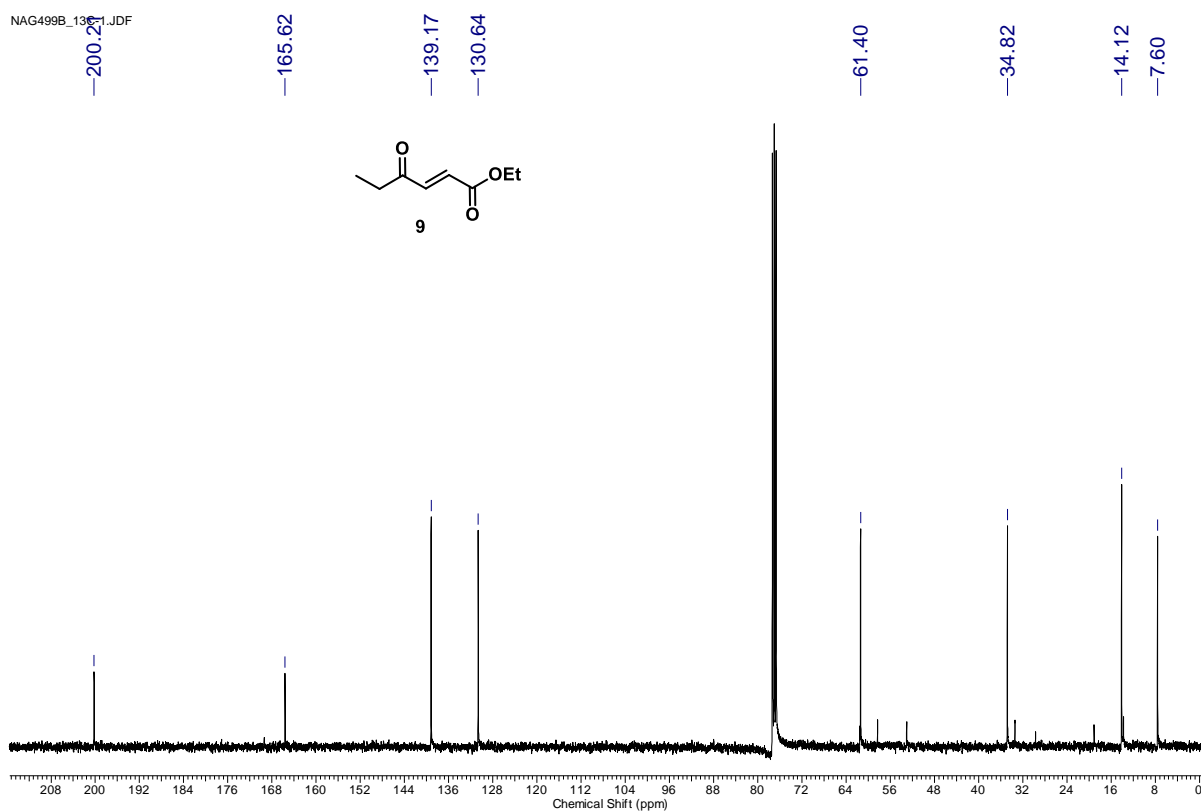

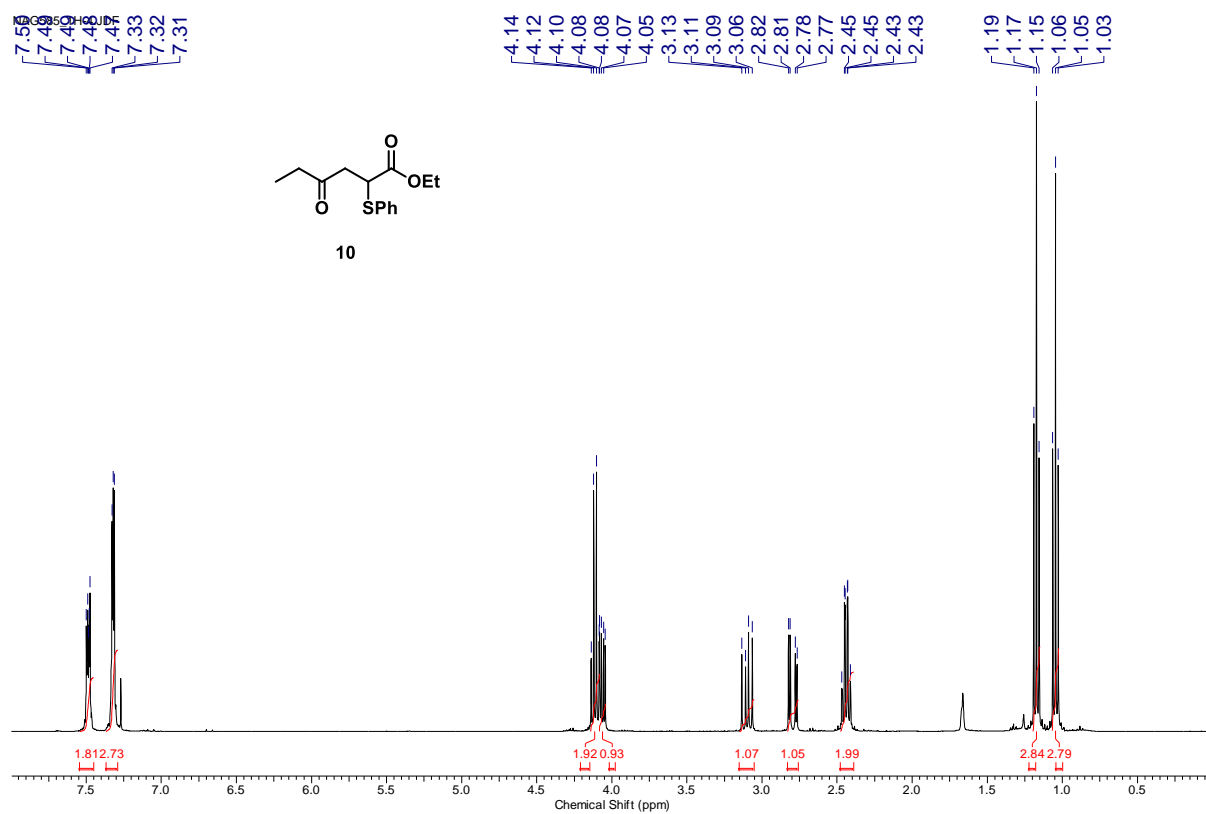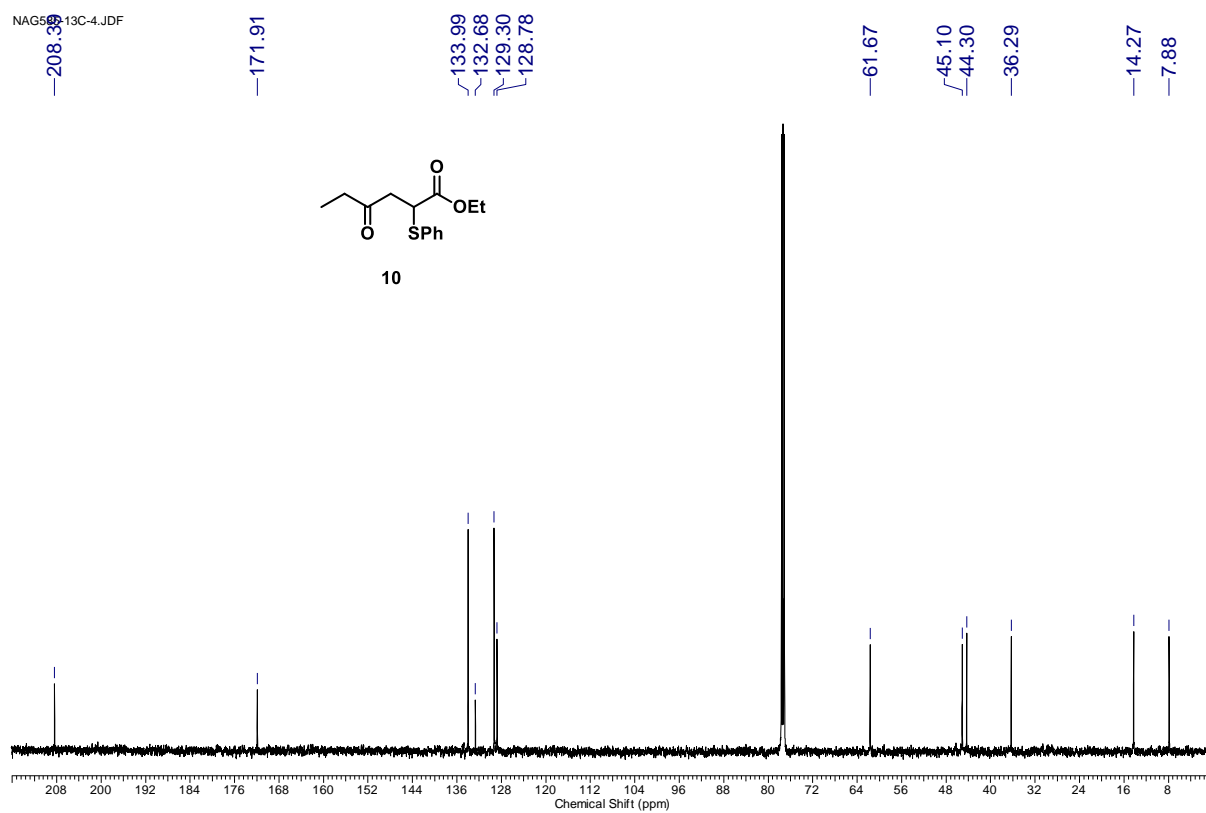

NAG540P\_1H-4.30F

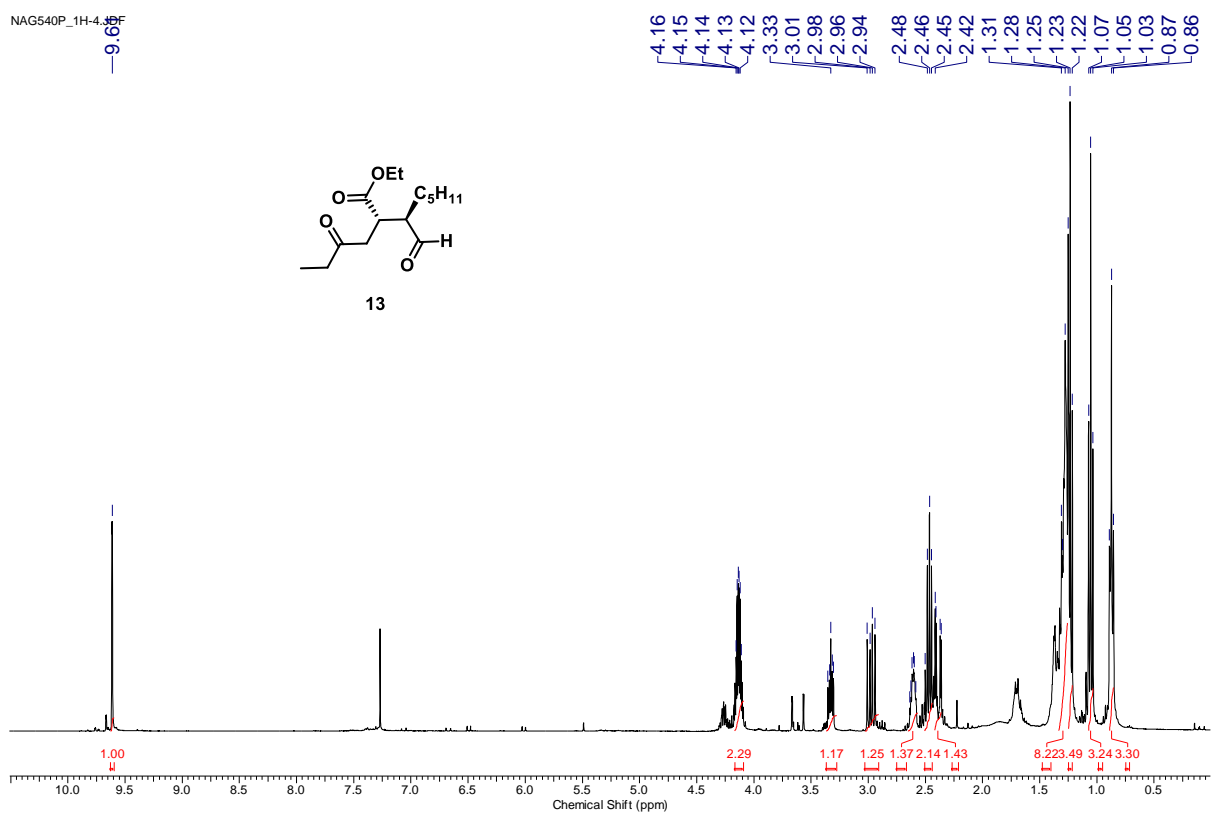

NAG540P\_13C-4.30F

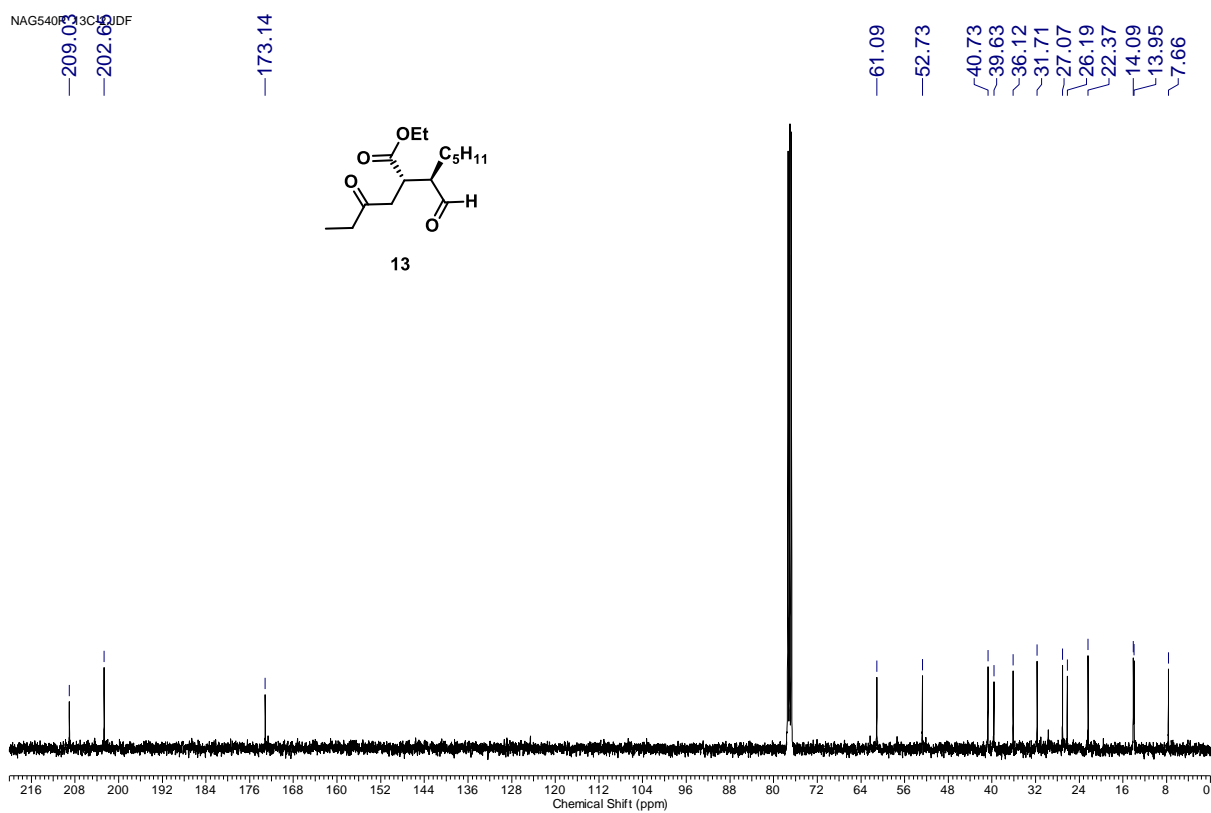

NAG545P\_1H-4.JDF

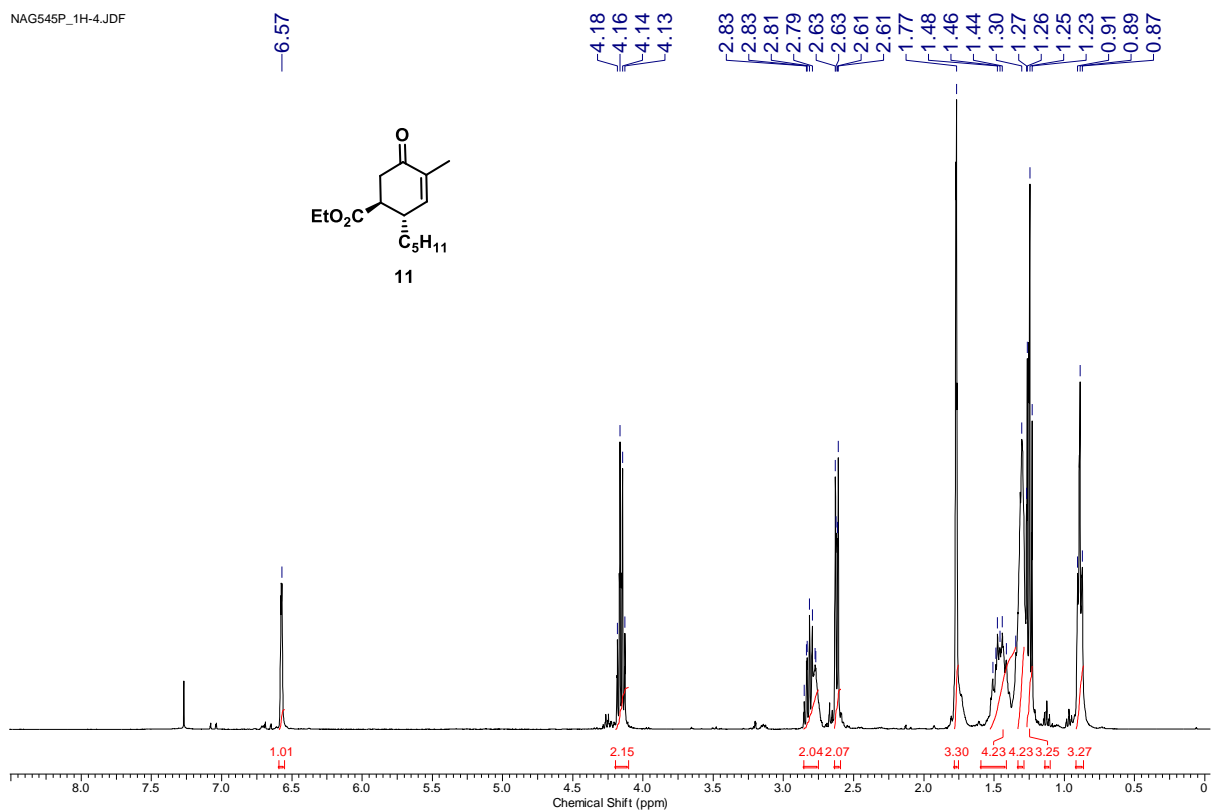

NAG545P\_13C-4.JDF

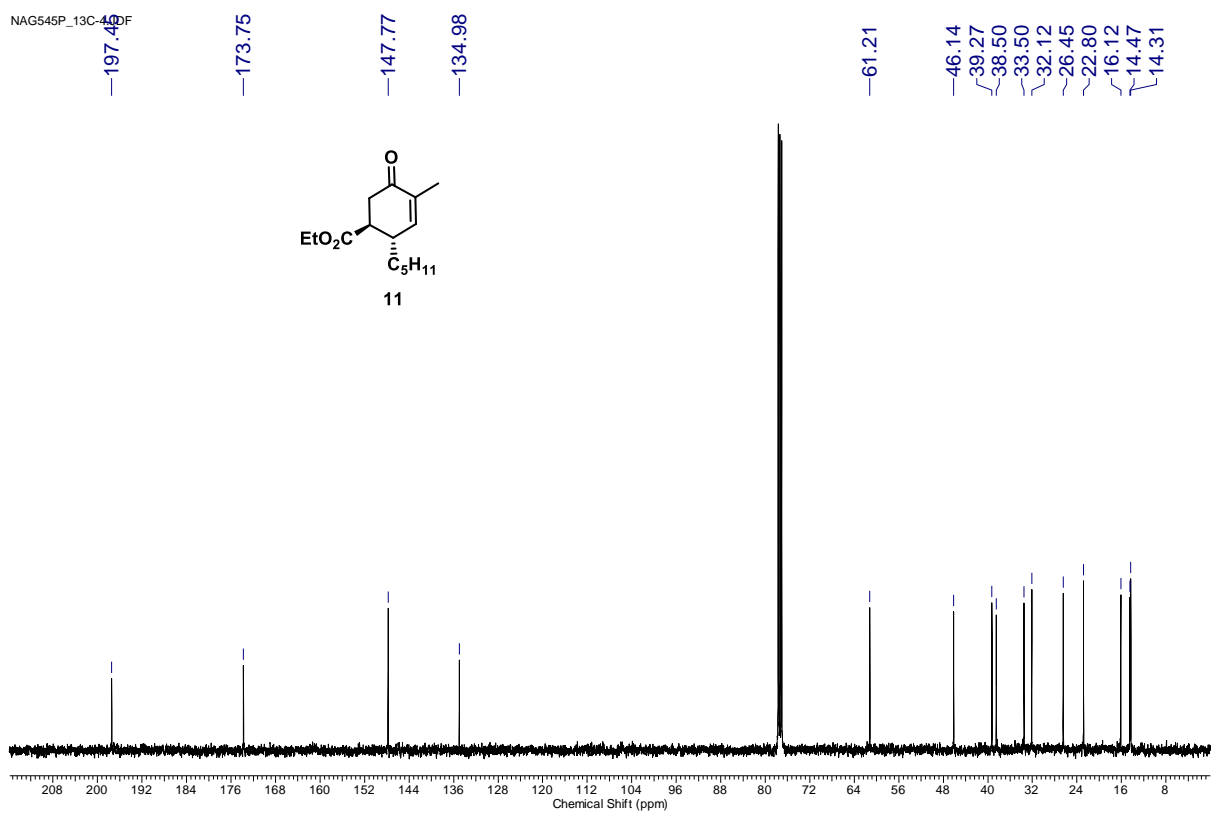

NAG382P\_1H-4.JDF

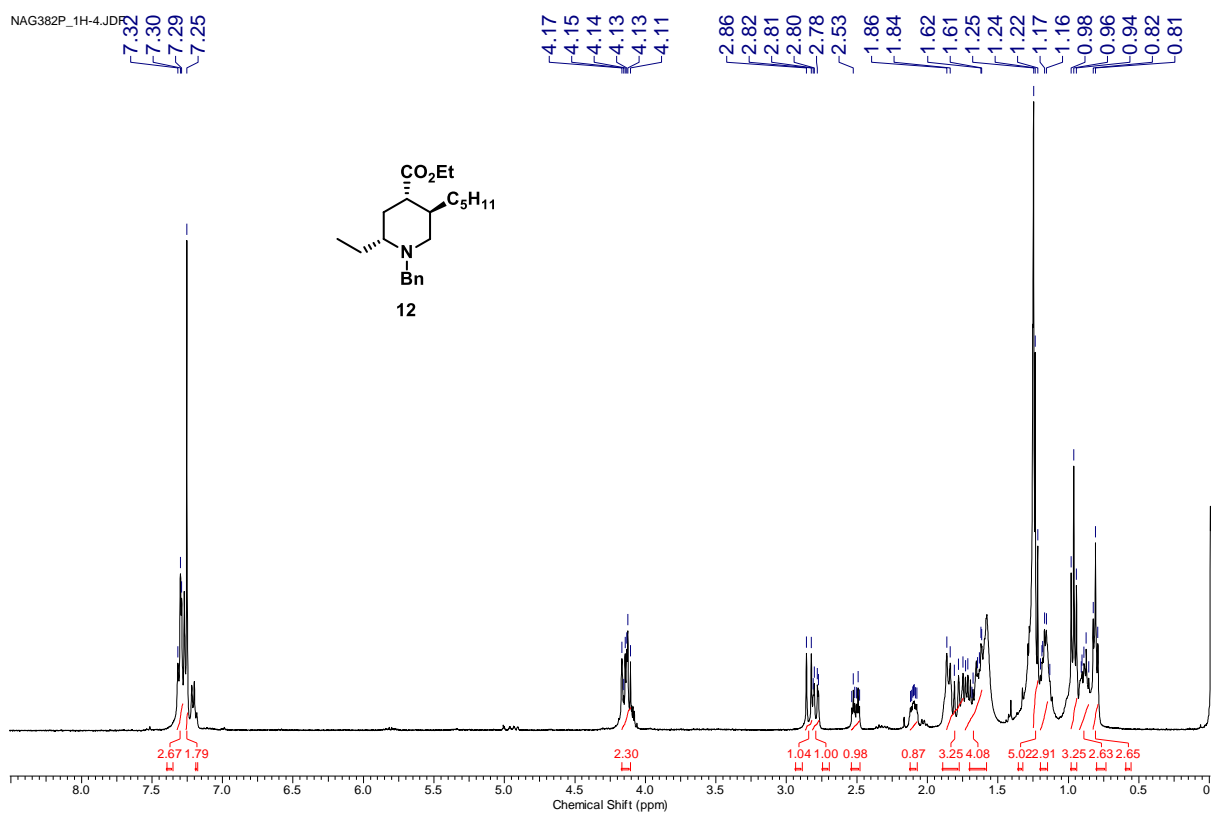

NAG382P\_13-2.JDF

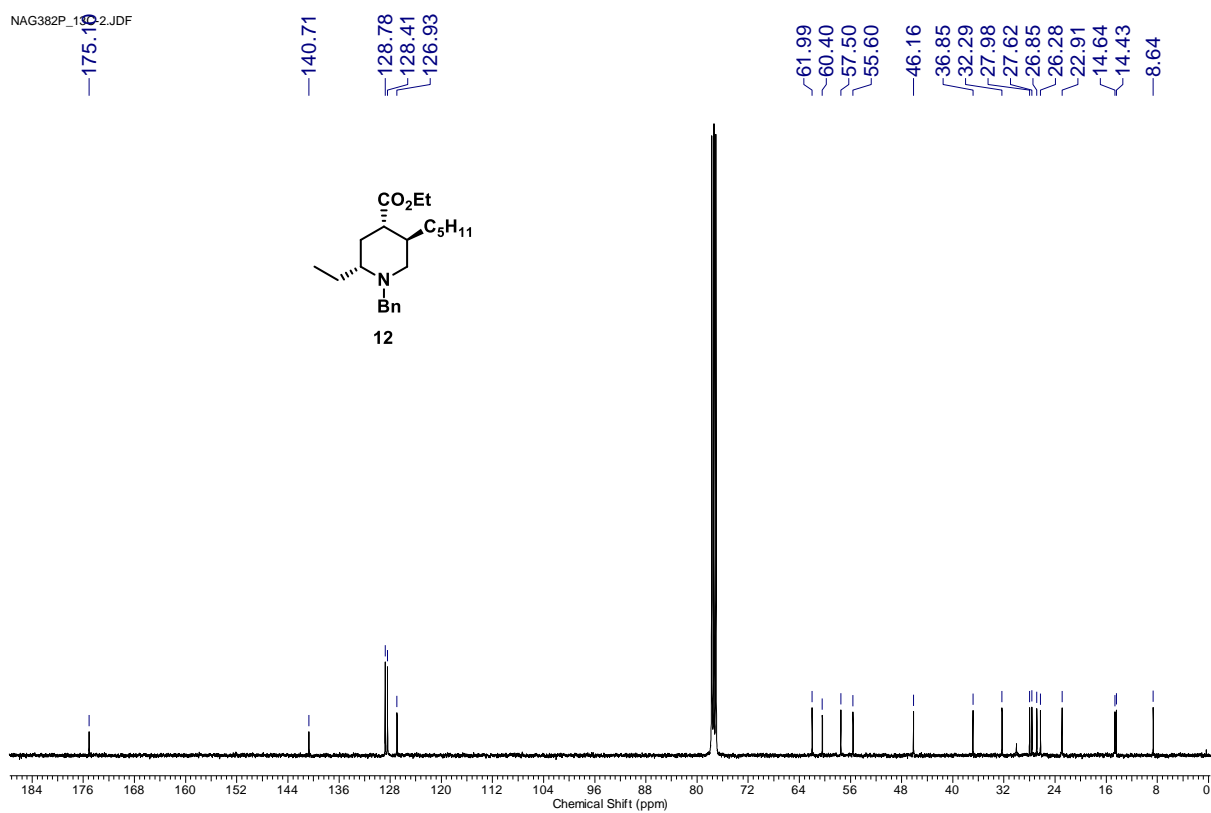

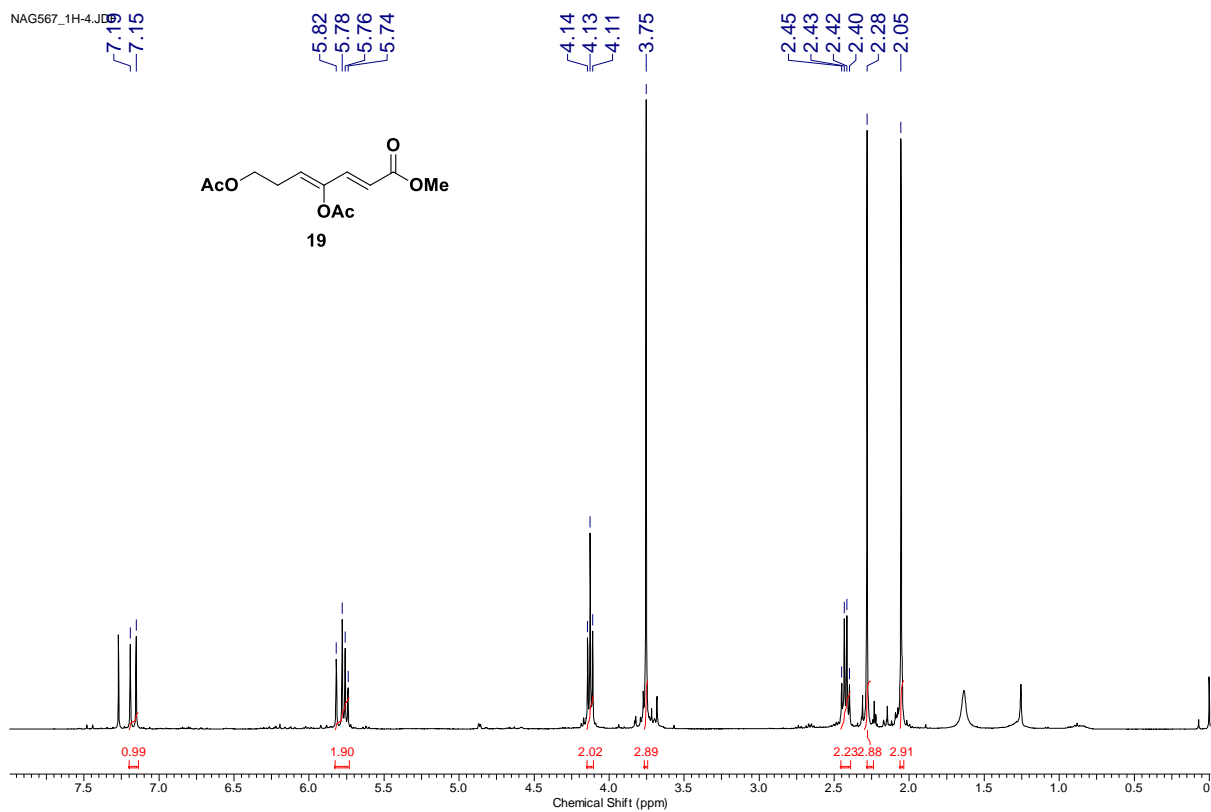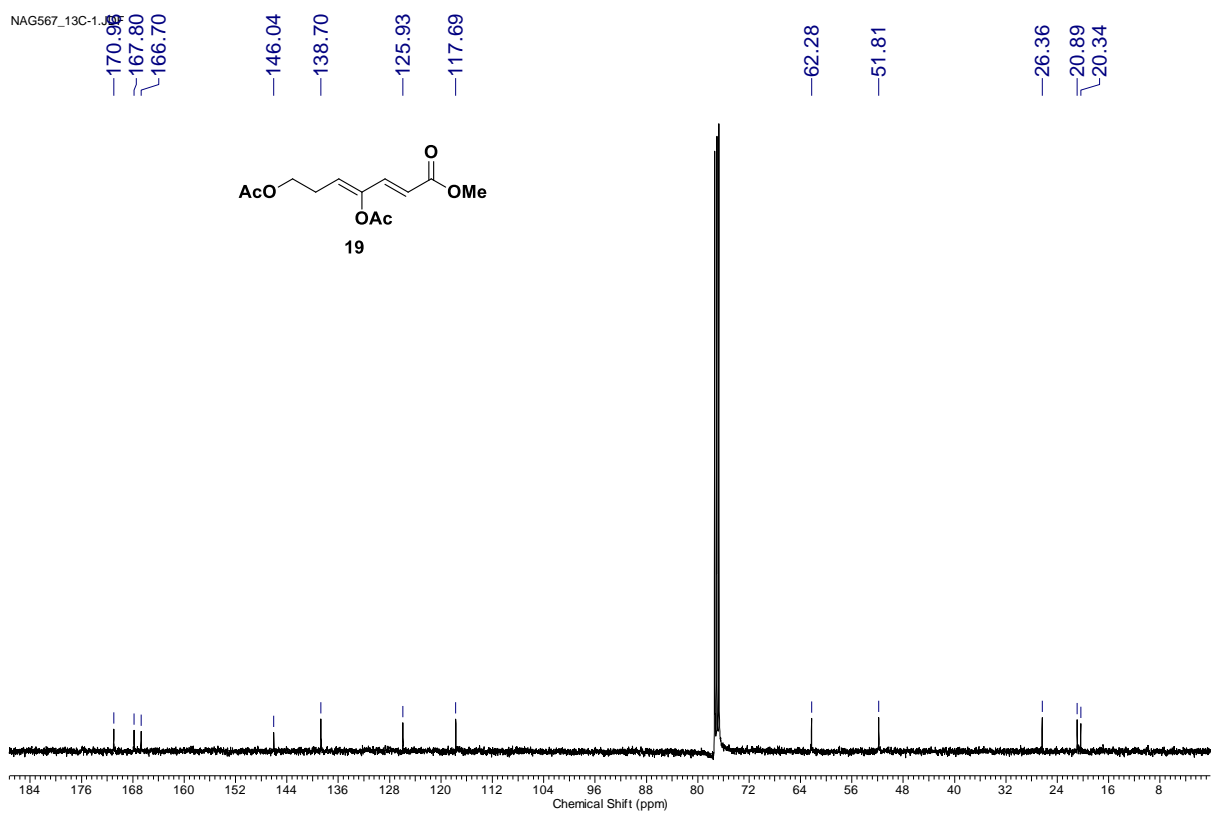

NAG548C-1H-4.JDF

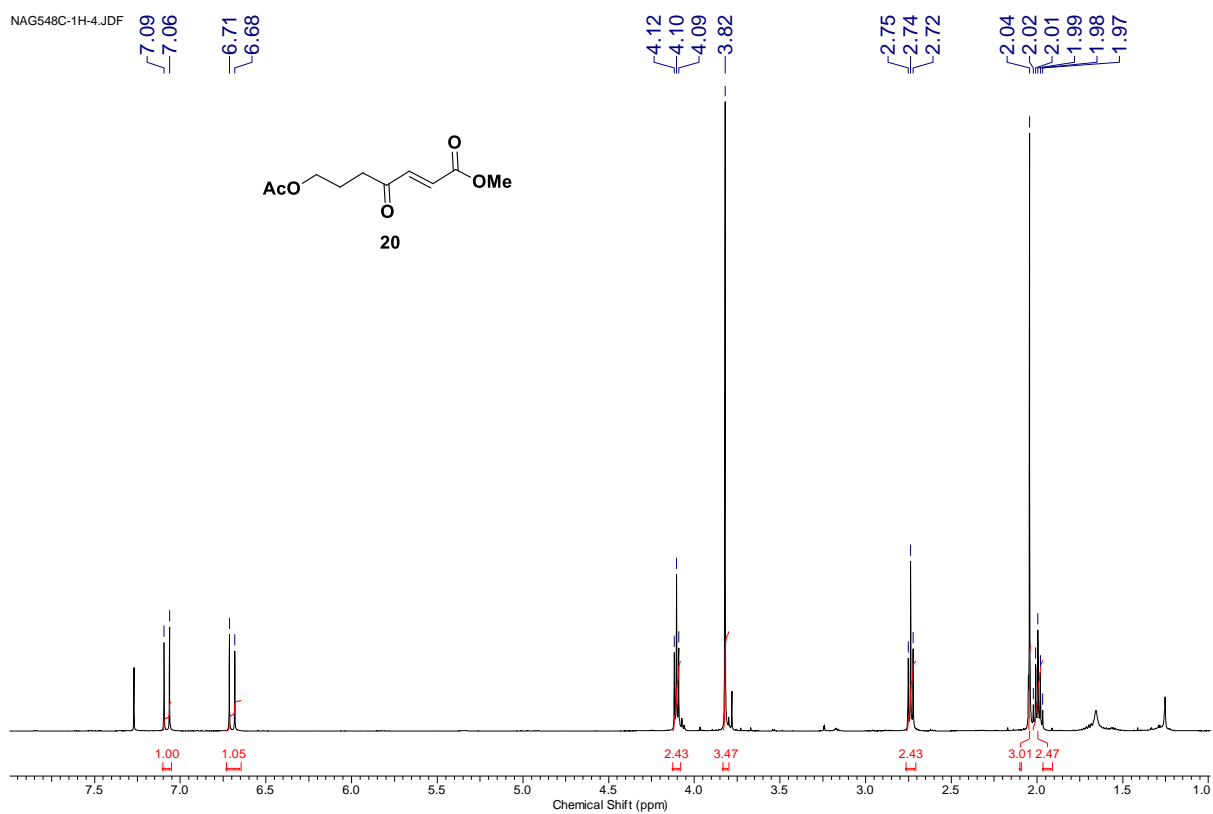

NAG548C-13C-7.JDF

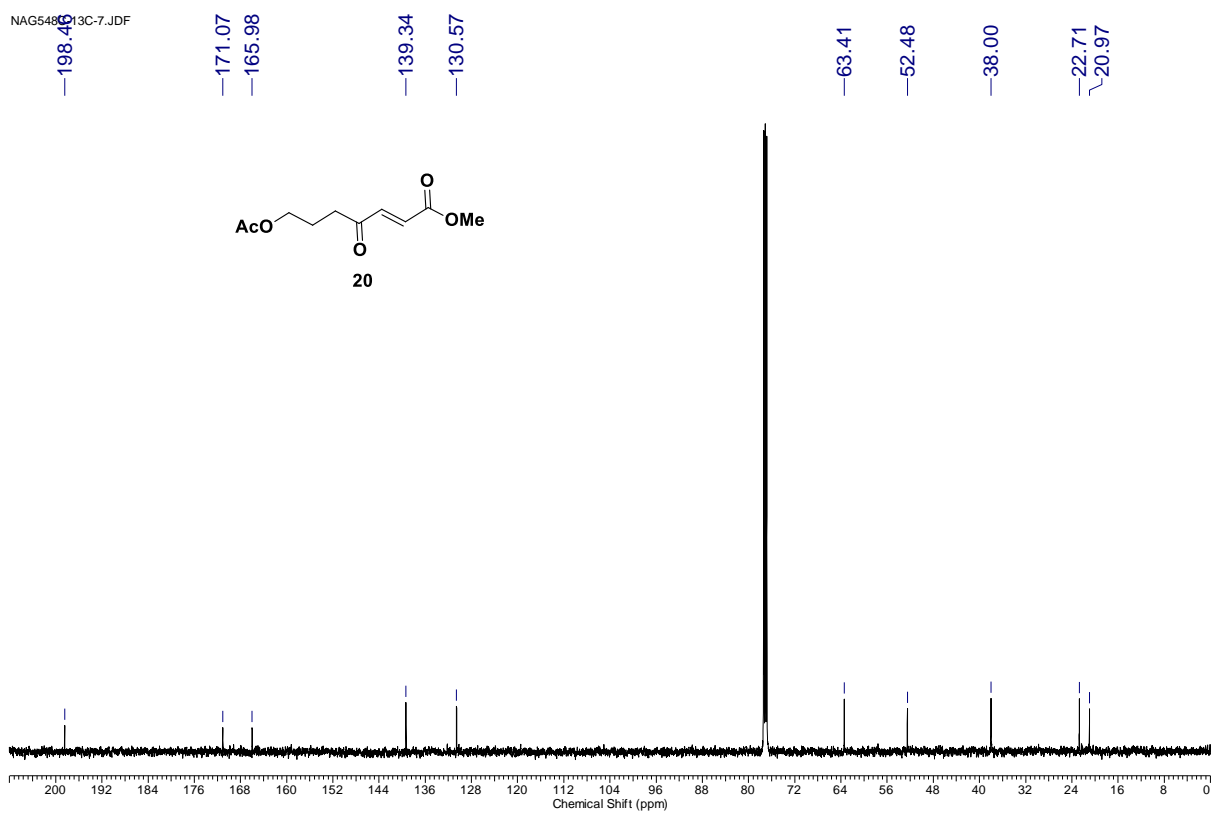

NAG586-1H-5.JDF

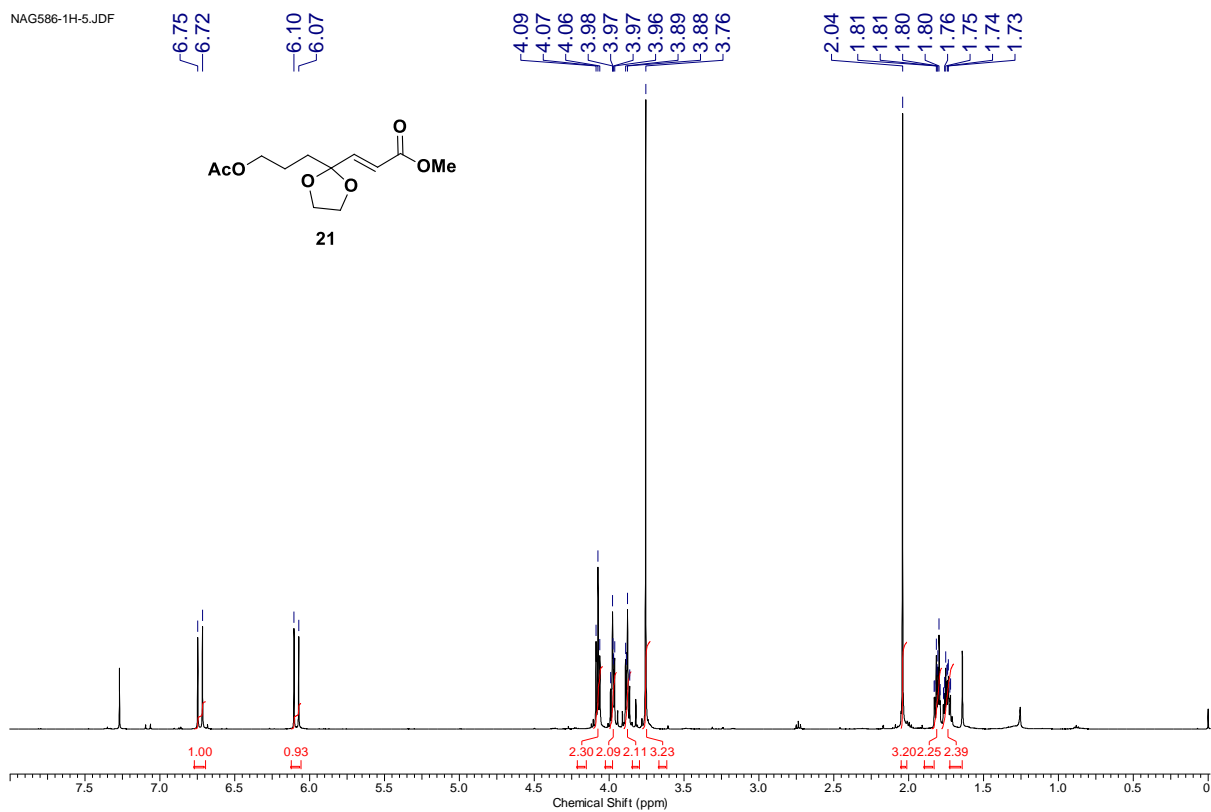

NAG586-CARBON-3.F

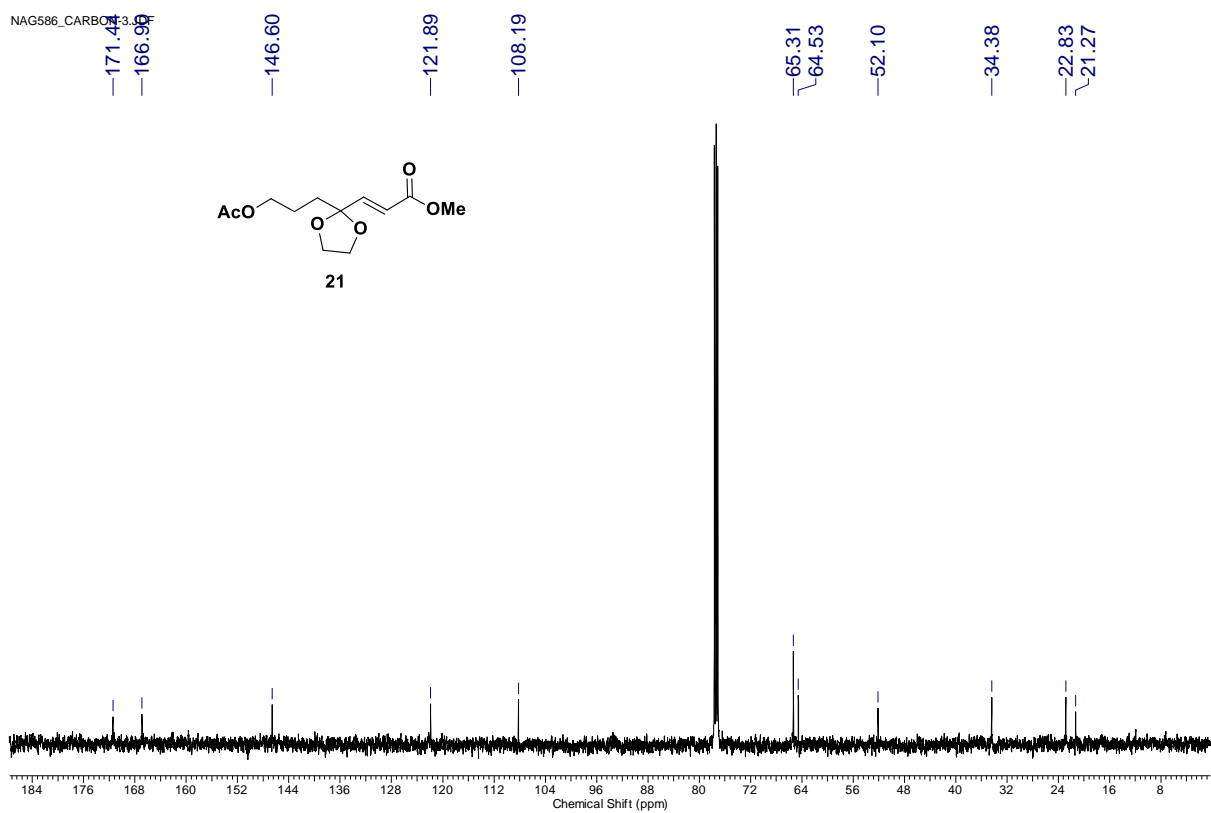

NAG659\_1H-9.JDF

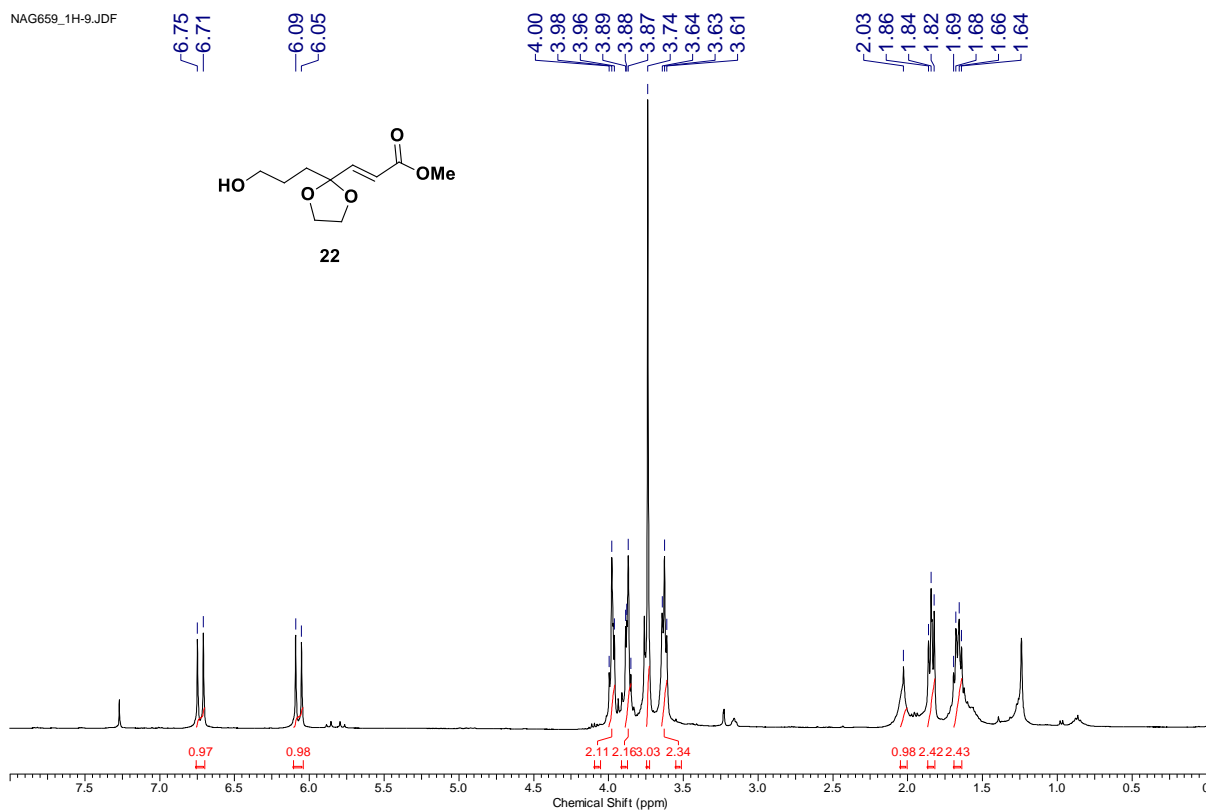

NAG659\_13C-1.JDF

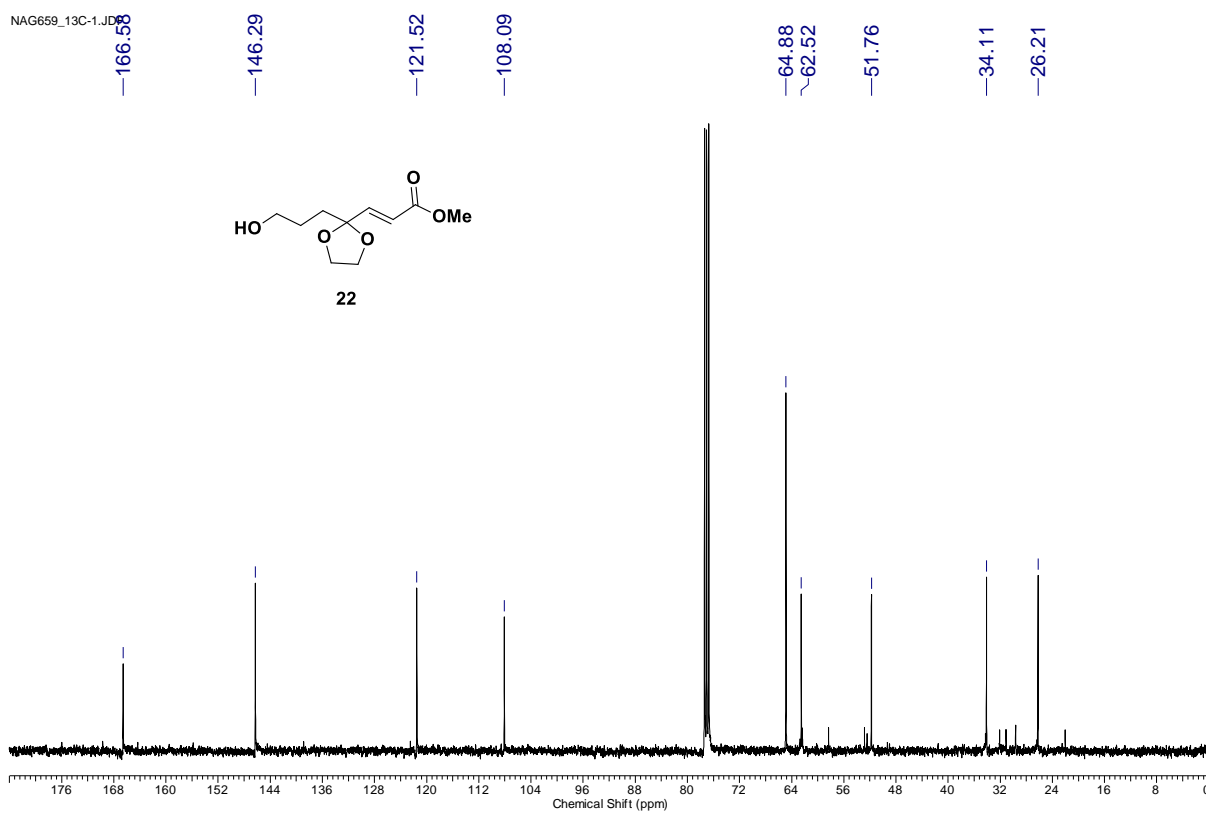

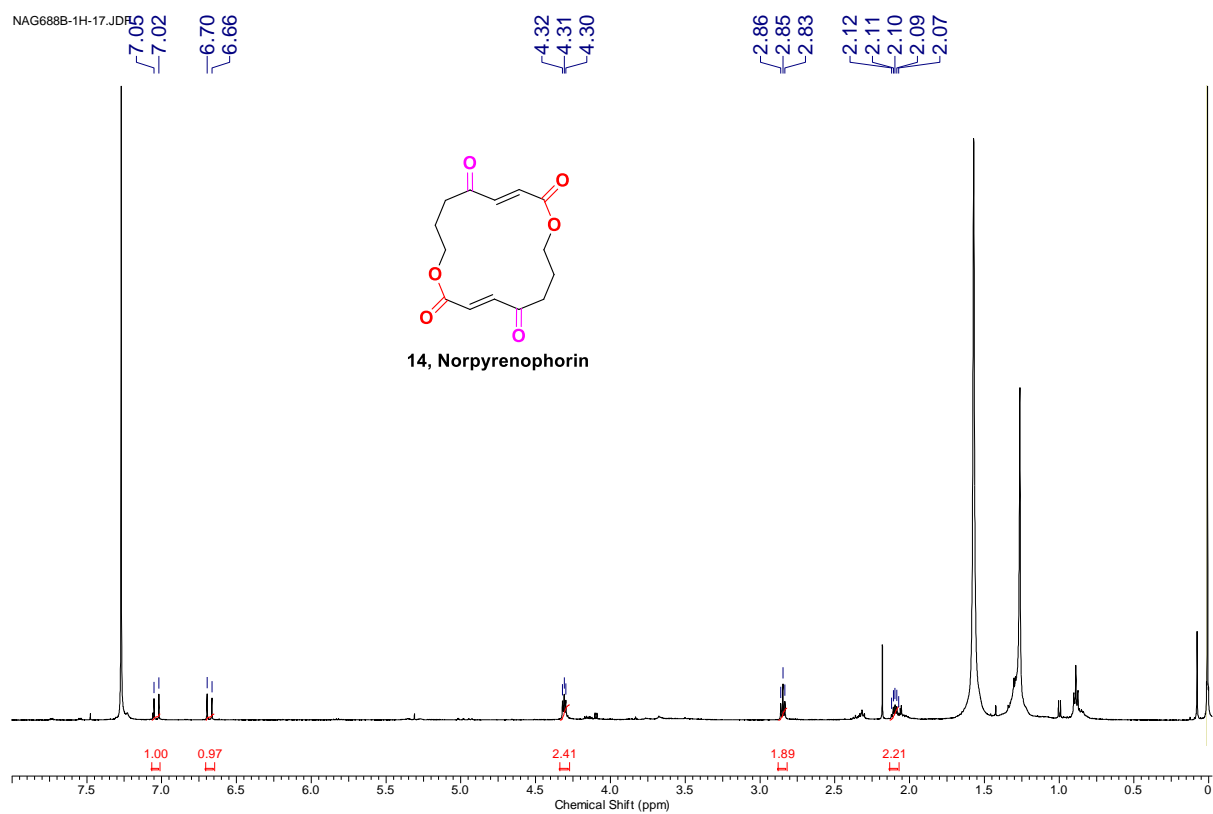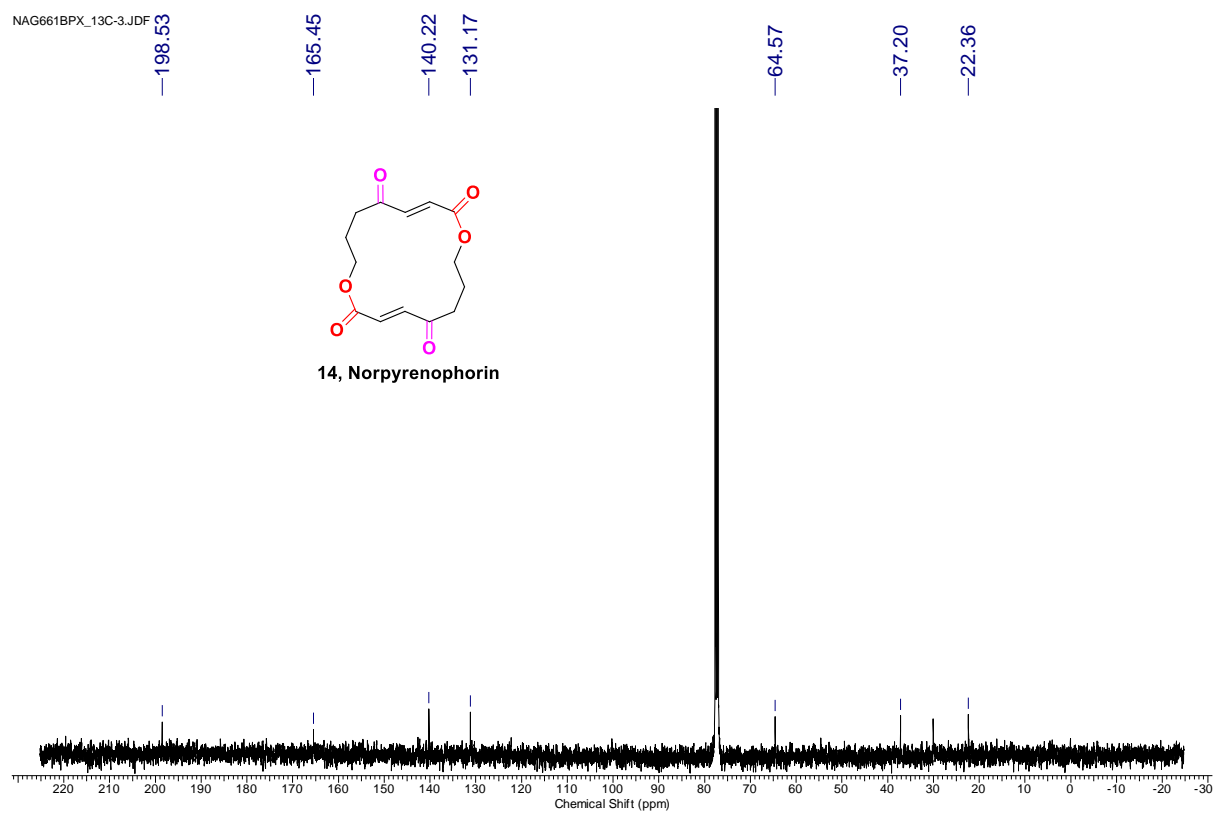

## 4. References

1. Wang, J.; Ma, A.; Ma, D., Organocatalytic Michael Addition of Aldehydes to  $\gamma$ -Keto- $\alpha,\beta$ -unsaturated Esters. An Efficient Entry to Versatile Chiral Building Blocks. *Organic Letters* **2008**, *10* (23), 5425-5428.
2. Kowalczyk, R.; Wierzba, A. J.; Boratynski, P. J.; Bakowicz, J., Enantioselective conjugate addition of aliphatic thiols to divergently activated electron poor alkenes and dienes. *Tetrahedron* **2014**, *70* (35), 5834-5842.
3. Shen, L.-L.; Mun, H.-S.; Jeong, J.-H., Macrocyclisation of Macrodiolide with Dimethylaluminium Methaneselenolate. *Eur. J. Org. Chem.* **2010**, (36), 6895-6899, S6895/1-S6895/6.
